# Supplementary material
Source: MDPI journal article supplement (https://www.mdpi.com/2073-4395/14/5/922)
Supplement: s1 [file s1]

**Supplemental Table S1** Bacterial Statistics of sample sequencing data processing results.

| Treatments | PE<br>Reads | Raw<br>Tags | Clean<br>Tags | Effective<br>Tags | AvgLen(bp) | GC(%) | Q20(%) | Q30(%) | Effective(%) |
|------------|-------------|-------------|---------------|-------------------|------------|-------|--------|--------|--------------|
| CK         | 79818       | 65166       | 50617         | 50177             | 418        | 53.9  | 95.03  | 90.49  | 62.86        |
| J1F1       | 79968       | 67652       | 52152         | 51626             | 420        | 54.9  | 95.04  | 90.55  | 64.56        |
| J1F2       | 79911       | 67269       | 52302         | 52103             | 419        | 53.48 | 95.21  | 90.83  | 65.2         |
| J2F1       | 80054       | 65136       | 50231         | 49460             | 417        | 55.11 | 94.76  | 90.03  | 61.78        |
| J2F2       | 79953       | 67466       | 51877         | 51613             | 421        | 55.02 | 95.03  | 90.51  | 64.55        |
| J3F1       | 80091       | 65576       | 50242         | 49607             | 420        | 55.28 | 94.97  | 90.37  | 61.94        |
| J3F2       | 80012       | 66440       | 51702         | 50993             | 418        | 54.98 | 95.04  | 90.51  | 63.73        |
| Summation  |             |             |               | 355579            |            |       |        |        |              |

**Supplemental Table S2** Bacterial Principal Component Analysis.

| Treatments | PC1          | PC2          | PC3          |
|------------|--------------|--------------|--------------|
| CK         | 0.019085617  | 0.005447994  | -0.013445546 |
| J1F1       | -0.009222153 | -0.00436525  | -0.00395959  |
| J1F2       | 0.010482959  | -0.009585698 | 0.019617434  |
| J2F1       | -0.005250512 | 0.022265587  | 0.008669914  |
| J2F2       | -0.009798274 | -0.005152839 | -0.004729944 |
| J3F1       | -0.003912177 | -0.004250348 | -0.002020142 |
| Loading    | 57.11473027  | 20.23959552  | 11.27009892  |

**Supplemental Table S3** Bacterial microbial community.

a. phylum

| phylum           | CK          | J1F1        | J1F2        | J2F1        | J2F2        | J3F1        | J3F2        |
|------------------|-------------|-------------|-------------|-------------|-------------|-------------|-------------|
| Proteobacteria   | 0.115624658 | 0.473966551 | 0.161354364 | 0.348277453 | 0.445275553 | 0.373476256 | 0.279783654 |
| Firmicutes       | 0.50095259  | 0.004601872 | 0.542531143 | 0.069055675 | 0.003691729 | 0.130275458 | 0.168533654 |
| Bacteroidetes    | 0.07180554  | 0.134427264 | 0.125924471 | 0.106249359 | 0.19052215  | 0.107291537 | 0.099399038 |
| Acidobacteria    | 0.01180335  | 0.146760282 | 0.046010865 | 0.074592433 | 0.140768266 | 0.107665462 | 0.068581731 |
| Actinobacteria   | 0.072659586 | 0.055248764 | 0.042891114 | 0.054009023 | 0.0581025   | 0.097295276 | 0.154975962 |
| Cyanobacteria    | 0.181276689 | 0.001341117 | 0.002487074 | 0.23113401  | 0.001713155 | 0.008226349 | 0.101081731 |
| Chloroflexi      | 0.005387058 | 0.076128116 | 0.022383664 | 0.043140572 | 0.057016697 | 0.051477004 | 0.031971154 |
| Gemmatimonadetes | 4.38E-05    | 0.017118965 | 0.006893994 | 0.027017328 | 0.015080591 | 0.032830612 | 0.021129808 |
| Verrucomicrobia  | 0.003043907 | 0.026506784 | 0.006435849 | 0.008971598 | 0.024128945 | 0.013610869 | 0.012235577 |
| Saccharibacteria | 0.016993321 | 0.016671926 | 0.008552043 | 0.003075977 | 0.01602162  | 0.005957871 | 0.024230769 |
| Planctomycetes   | 0           | 0.009230041 | 0.002225277 | 0.009843125 | 0.015490783 | 0.033179609 | 0.008365385 |
| Tenericutes      | 0.014058907 | 0.000184075 | 0.019940223 | 0.002435148 | 0.000144774 | 0.003639536 | 0.006706731 |
| Latescibacteria  | 2.19E-05    | 0.014962659 | 0.000719942 | 0.003204142 | 0.014115433 | 0.005982799 | 0.003245192 |
| Nitrospirae      | 0.000481769 | 0.007836331 | 0.003294282 | 0.008151338 | 0.006659589 | 0.00463667  | 0.005961538 |
| Armatimonadetes  | 0           | 0.002761123 | 0.000589044 | 0.002563314 | 0.001954445 | 0.002916615 | 0.001995192 |
| Parcubacteria    | 0           | 0.001051857 | 0.002639789 | 0.001486722 | 0.001495995 | 0.00523495  | 0.000552885 |
| Elusimicrobia    | 0.000328479 | 0.001945935 | 0.000414512 | 0.001666154 | 0.001278834 | 0.00239312  | 0.001442308 |
| Chlorobi         | 0           | 0.002734827 | 6.54E-05    | 0.001512355 | 0.000820384 | 0.001994266 | 0.001225962 |
| Microgenomates   | 0           | 0.002866309 | 0.00122172  | 0.00041013  | 0.001085803 | 0.001445843 | 0.000865385 |
| Spirochaetae     | 0.000547465 | 0.000289261 | 0.000109082 | 0.001025326 | 0.000265418 | 0.002966471 | 0.002403846 |
| Others           | 0.004970984 | 0.003365941 | 0.003316098 | 0.002178817 | 0.004367339 | 0.007503428 | 0.0053125   |

| b. genus                                              |             |             |             |             |             |             |             |
|-------------------------------------------------------|-------------|-------------|-------------|-------------|-------------|-------------|-------------|
| genus                                                 | CK          | J1F1        | J1F2        | J2F1        | J2F2        | J3F1        | J3F2        |
| Lactobacillus                                         | 0.190277017 | 0.00205112  | 0.161550712 | 0.028811648 | 0.001351221 | 0.044148074 | 0.048365385 |
| Nicotiana_otothra                                     | 0.169626629 | 0.000604818 | 0.000829025 | 0.050240952 | 0.000530837 | 0.007029789 | 0.015432692 |
| Rhodococcus                                           | 0.037731304 | 0.000420743 | 0.017344067 | 0.014508356 | 0.001544252 | 0.047014832 | 0.088149038 |
| uncultured_bacterium_f_Anaerolineaceae                | 0.003416183 | 0.052645419 | 0.017496782 | 0.028811648 | 0.040464241 | 0.041854668 | 0.019326923 |
| uncultured_bacterium_f_Cytophagaceae                  | 0.00251834  | 0.055669507 | 0.015424221 | 0.013021634 | 0.080228742 | 0.023632058 | 0.0078125   |
| uncultured_bacterium_f_Bacteroidales_S24-7_group      | 0.055491076 | 0.000447039 | 0.073412309 | 0.011073516 | 0.000193032 | 0.023557273 | 0.031850962 |
| Microcystis                                           | 0           | 2.63E-05    | 0           | 0.177970881 | 0           | 0           | 0           |
| uncultured_bacterium_o_Xanthomonadales                | 0.002868718 | 0.039891659 | 0.00820298  | 0.01625141  | 0.045893254 | 0.045768416 | 0.012451923 |
| uncultured_bacterium_c_Subgroup_6                     | 0.003613271 | 0.041732408 | 0.011519078 | 0.015302984 | 0.043890551 | 0.025701109 | 0.016875    |
| uncultured_bacterium_f_Nitrosomonadaceae              | 0.003328589 | 0.038024613 | 0.009446517 | 0.026145801 | 0.044228356 | 0.01792347  | 0.015       |
| Ruminococcaceae_UCG-014                               | 0.023891383 | 0.000157778 | 0.090952724 | 0.002973444 | 4.83E-05    | 0.004910881 | 0.011009615 |
| Allobaculum                                           | 0.04110369  | 0.000210371 | 0.057966272 | 0.004844663 | 0.000168903 | 0.012439237 | 0.015360577 |
| Sphingomonas                                          | 0.003000109 | 0.043704639 | 0.010908218 | 0.016559007 | 0.019110125 | 0.019244672 | 0.011346154 |
| uncultured_bacterium_f_Erysipelotrichaceae            | 0.057812329 | 0.000236668 | 0.02779414  | 0.00522916  | 0.000482579 | 0.009647264 | 0.012475962 |
| Acidibacter                                           | 0.003416183 | 0.013989692 | 0.003621528 | 0.021813801 | 0.019423801 | 0.028368441 | 0.010769231 |
| uncultured_bacterium_f_Chitinophagaceae               | 0           | 0.024403071 | 0.007657569 | 0.009843125 | 0.032212142 | 0.011018322 | 0.008197115 |
| Haliangium                                            | 0.003087704 | 0.017539708 | 0.006523115 | 0.010150723 | 0.018241482 | 0.023083635 | 0.011730769 |
| uncultured_bacterium_f_Xanthomonadales_Incertae_Sedis | 0.002781123 | 0.016303776 | 0.01230447  | 0.011945043 | 0.017565872 | 0.013012589 | 0.013990385 |
| uncultured_bacterium_p_Saccharibacteria               | 0.014343589 | 0.016145998 | 0.003926959 | 0.002537681 | 0.01556317  | 0.00508538  | 0.023533654 |
| Chroococcidiopsis                                     | 0           | 0           | 0           | 0           | 0           | 0           | 0.074423077 |
| Others                                                | 0.317398445 | 0.532213106 | 0.385910945 | 0.451194504 | 0.500868642 | 0.492533965 | 0.462139423 |
| Unclassified                                          | 0.064294317 | 0.103581571 | 0.077208369 | 0.080770019 | 0.117990541 | 0.104025925 | 0.089759615 |

**Supplemental Table S4** Ternary Diagram, CK, J1 and J2 groups in the bacterial phylum level.

| Phylum           | Genus                                       | CK_ratio | F1_ratio | F2_ratio | CK_reabundance | F1_reabundance | F2_reabundance |
|------------------|---------------------------------------------|----------|----------|----------|----------------|----------------|----------------|
| Verrucomicrobia  | uncultured_bacterium_c_OPB35_soil_group     | 0.0432   | 0.5405   | 0.4162   | 0.000679       | 0.00848449     | 0.006533158    |
| Saccharibacteria | uncultured_bacterium_p_Saccharibacteria     | 0.3966   | 0.2164   | 0.387    | 0.014344       | 0.00782724     | 0.013997408    |
| Actinobacteria   | Aeromicrobium                               | 0        | 0.8043   | 0.1957   | 0              | 0.00060603     | 0.000147423    |
| Proteobacteria   | Dokdonella                                  | 0        | 0.9083   | 0.0917   | 0              | 0.00015364     | 1.55E-05       |
| Proteobacteria   | Vulgatibacter                               | 0        | 0.0294   | 0.9706   | 0              | 2.56E-05       | 0.000845741    |
| Bacteroidetes    | Bacteroides                                 | 0.3913   | 0.0932   | 0.5156   | 0.007314       | 0.00174128     | 0.009636797    |
| Actinobacteria   | Brachybacterium                             | 0        | 0.9257   | 0.0743   | 0              | 0.00029021     | 2.33E-05       |
| Proteobacteria   | Steroidobacter                              | 0.0661   | 0.3206   | 0.6133   | 0.000438       | 0.00212539     | 0.004065766    |
| Firmicutes       | Family_XIII_AD3011_group                    | 0.7384   | 0        | 0.2616   | 0.00046        | 0              | 0.000162941    |
| Proteobacteria   | uncultured_bacterium_f_P3OB-42              | 0        | 0.444    | 0.556    | 0              | 0.00045239     | 0.000566414    |
| Chloroflexi      | Ornatilinea                                 | 1        | 0        | 0        | 0.000788       | 0              | 0              |
| Chloroflexi      | uncultured_bacterium_c_Gitt-GS-136          | 0.0192   | 0.4782   | 0.5026   | 2.19E-05       | 0.00054628     | 0.000574173    |
| Latescibacteria  | uncultured_bacterium_p_Latescibacteria      | 0.0018   | 0.5967   | 0.4015   | 2.19E-05       | 0.00722974     | 0.004864953    |
| Actinobacteria   | uncultured_bacterium_f_Propionibacteriaceae | 0        | 0        | 1        | 0              | 0              | 0.000287087    |
| Proteobacteria   | Caulobacter                                 | 0        | 0.6816   | 0.3184   | 0              | 0.00152789     | 0.000713837    |
| Bacteroidetes    | Flavitalea                                  | 0        | 0.7522   | 0.2478   | 0              | 0.00058896     | 0.000193977    |
| Proteobacteria   | uncultured_bacterium_f_Blfdi19              | 0        | 0.9565   | 0.0435   | 0              | 0.00017071     | 7.76E-06       |
| Bacteroidetes    | Flavobacterium                              | 0.0748   | 0.2994   | 0.6258   | 0.000569       | 0.00227903     | 0.004764085    |
| Bacteroidetes    | Nibribacter                                 | 0        | 0.898    | 0.102    | 0              | 0.00013657     | 1.55E-05       |
| Firmicutes       | Clostridium_sensu_stricto_1                 | 0.5574   | 0.0633   | 0.3793   | 0.012701       | 0.00144253     | 0.008643632    |
| Firmicutes       | Acetitomaculum                              | 0.6382   | 0        | 0.3618   | 0.000219       | 0              | 0.000124146    |
| Firmicutes       | Anaerococcus                                | 0        | 0.5326   | 0.4674   | 0              | 0.00024754     | 0.000217255    |
| Firmicutes       | Ruminococcaceae_UCG-005                     | 0.3089   | 0.0708   | 0.6203   | 0.001117       | 0.00025607     | 0.002242379    |
| Proteobacteria   | Alsobacter                                  | 1        | 0        | 0        | 0.001029       | 0              | 0              |
| Firmicutes       | uncultured_bacterium_f_Peptococcaceae       | 0.4137   | 0        | 0.5863   | 0.000635       | 0              | 0.000900055    |
| Chloroflexi      | uncultured_bacterium_f_Anaerolineaceae      | 0.0489   | 0.5867   | 0.3644   | 0.003416       | 0.04101404     | 0.025473111    |
| Proteobacteria   | uncultured_bacterium_f_Syntrophaceae        | 1        | 0        | 0        | 0.000547       | 0              | 0              |

|                     |                                          |        |        |        |          |            |             |
|---------------------|------------------------------------------|--------|--------|--------|----------|------------|-------------|
| Proteobacteria      | uncultured_bacterium_f_KF-JG30-B3        | 0.0177 | 0.5548 | 0.4276 | 8.76E-05 | 0.0027485  | 0.002118233 |
| Chloroflexi         | uncultured_bacterium_o_C0119             | 0      | 0.4889 | 0.5111 | 0        | 0.00034143 | 0.000356918 |
| Proteobacteria      | Georgfuchsia                             | 0      | 0.0576 | 0.9424 | 0        | 1.71E-05   | 0.000279327 |
| Bacteroidetes       | Parafilimonas                            | 0      | 0.0323 | 0.9677 | 0        | 8.54E-06   | 0.00025605  |
| Actinobacteria      | Rubrobacter                              | 0.1249 | 0.4056 | 0.4695 | 0.000394 | 0.00128036 | 0.001481987 |
| Proteobacteria      | Meganema                                 | 0      | 1      | 0      | 0        | 0.00363621 | 0           |
| Bacteroidetes       | uncultured_bacterium_f_KD3-93            | 0      | 0.6247 | 0.3753 | 0        | 0.00098161 | 0.000589691 |
| Chlamydiae          | uncultured_bacterium_f_Simkaniaceae      | 0      | 0      | 1      | 0        | 0          | 0.000450028 |
| Proteobacteria      | uncultured_bacterium_f_Unknown_Family    | 0.151  | 0.4746 | 0.3744 | 0.000328 | 0.00103282 | 0.000814705 |
| Actinobacteria      | Alpinimonas                              | 0      | 0.7675 | 0.2325 | 0        | 0.00023046 | 6.98E-05    |
| Actinobacteria      | uncultured_bacterium_f_288-2             | 0      | 0.7397 | 0.2603 | 0        | 0.00026461 | 9.31E-05    |
| Firmicutes          | Aerococcus                               | 0      | 0.7246 | 0.2754 | 0        | 0.00046946 | 0.000178459 |
| Nitrospirae         | uncultured_bacterium_f_0319-6A21         | 0.0756 | 0.5045 | 0.4199 | 0.000197 | 0.0013145  | 0.001094032 |
| Proteobacteria      | Sphingomonas                             | 0.0698 | 0.6117 | 0.3185 | 0.003    | 0.02628996 | 0.013687045 |
| Proteobacteria      | Panacagrimonas                           | 0      | 0.5621 | 0.4379 | 0        | 0.00017925 | 0.000139664 |
| Proteobacteria      | uncultured_bacterium_f_A0839             | 0      | 0.4987 | 0.5013 | 0        | 0.00104989 | 0.001055237 |
| Chloroflexi         | Roseiflexus                              | 0      | 0.6096 | 0.3904 | 0        | 0.00239853 | 0.001536301 |
| Bacteroidetes       | Dinghuibacter                            | 0      | 0.3284 | 0.6716 | 0        | 0.00020486 | 0.000418991 |
| Proteobacteria      | Ferrovibrio                              | 0      | 0.5946 | 0.4054 | 0        | 0.00030729 | 0.000209496 |
| Deinococcus-Thermus | Truepera                                 | 0.984  | 0.016  | 0      | 0.000526 | 8.54E-06   | 0           |
| Nitrospirae         | Nitrospira                               | 0.0297 | 0.5681 | 0.4021 | 0.000285 | 0.00543724 | 0.003848511 |
| Gemmatimonadetes    | uncultured_bacterium_f_Longimicrobiaceae | 0      | 0.9278 | 0.0722 | 0        | 0.00508728 | 0.000395714 |
| Chloroflexi         | uncultured_bacterium_c_JG37-AG-4         | 0      | 0.1803 | 0.8197 | 0        | 3.41E-05   | 0.000155182 |
| Proteobacteria      | Klebsiella                               | 0.1684 | 0.2712 | 0.5604 | 0.000504 | 0.00081089 | 0.001675965 |
| Chloroflexi         | uncultured_bacterium_c_TK10              | 0      | 0.4532 | 0.5468 | 0        | 0.00138278 | 0.001668206 |
| Firmicutes          | Syntrophomonas                           | 1      | 0      | 0      | 0.000788 | 0          | 0           |
| Proteobacteria      | Nannocystis                              | 0      | 0.5479 | 0.4521 | 0        | 0.00064871 | 0.000535378 |
| Tectomicrobia       | uncultured_bacterium_p_Tectomicrobia     | 0      | 0.4737 | 0.5263 | 0        | 7.68E-05   | 8.54E-05    |
| Planctomycetes      | uncultured_bacterium_c_Pla3_lineage      | 0      | 0.4919 | 0.5081 | 0        | 0.00018779 | 0.000193977 |

|                  |                                                           |        |        |        |          |            |             |
|------------------|-----------------------------------------------------------|--------|--------|--------|----------|------------|-------------|
| Gemmatimonadetes | Gemmatirosa                                               | 0      | 0.4296 | 0.5704 | 0        | 0.00087064 | 0.001156105 |
| Actinobacteria   | Pseudonocardia                                            | 0.4011 | 0.4011 | 0.1978 | 0.000504 | 0.00050361 | 0.000248291 |
| Firmicutes       | Enterococcus                                              | 0.5846 | 0.1934 | 0.222  | 0.003044 | 0.00100721 | 0.001156105 |
| Firmicutes       | Ruminococcaceae_UCG-009                                   | 0.671  | 0.0635 | 0.2655 | 0.002256 | 0.00021339 | 0.000892296 |
| Actinobacteria   | Nocardioidea                                              | 0      | 0.2892 | 0.7108 | 0        | 0.00135718 | 0.003336411 |
| Bacteroidetes    | Hymenobacter                                              | 0      | 0.3929 | 0.6071 | 0        | 8.54E-05   | 0.000131905 |
| Cyanobacteria    | uncultured_bacterium_o_Gastranaerophilales                | 0      | 0.1626 | 0.8374 | 0        | 5.12E-05   | 0.000263809 |
| Acidobacteria    | uncultured_Acidobacteria_bacterium                        | 0.0904 | 0.4975 | 0.4122 | 0.001577 | 0.00868081 | 0.007192682 |
| Elusimicrobia    | uncultured_bacterium_o_Lineage_IIb                        | 0      | 0.7733 | 0.2267 | 0        | 0.00026461 | 7.76E-05    |
| Parcubacteria    | uncultured_bacterium_c_Candidatus_Magasanikbacteria       | 0      | 0.3089 | 0.6911 | 0        | 0.00011096 | 0.000248291 |
| Fibrobacteres    | uncultured_bacterium_f_Fibrobacteraceae                   | 0      | 1      | 0      | 0        | 0.00040971 | 0           |
| Proteobacteria   | uncultured_bacterium_f_DA111                              | 0      | 0.6753 | 0.3247 | 0        | 0.00132303 | 0.000636246 |
| Firmicutes       | Anaerostipes                                              | 0      | 0.2056 | 0.7944 | 0        | 3.41E-05   | 0.000131905 |
| Bacteroidetes    | uncultured_bacterium_c_Bacteroidetes_VC2.1_Bac22          | 0      | 0.6422 | 0.3578 | 0        | 0.00052921 | 0.000294846 |
| Proteobacteria   | uncultured_bacterium_o_Alphaproteobacteria_Incertae_Sedis | 0      | 0.9454 | 0.0546 | 0        | 0.00268875 | 0.000155182 |
| Actinobacteria   | uncultured_bacterium_c_MB-A2-108                          | 0      | 0.4831 | 0.5169 | 0        | 0.00067432 | 0.000721596 |
| Acidobacteria    | uncultured_bacterium_c_Subgroup_5                         | 0      | 0.3639 | 0.6361 | 0        | 0.00011096 | 0.000193977 |
| Euryarchaeota    | uncultured_archaeon                                       | 0      | 0.569  | 0.431  | 0        | 0.00015364 | 0.000116386 |
| Elusimicrobia    | uncultured_bacterium_o_MVP-88                             | 0.0595 | 0.5987 | 0.3417 | 0.000109 | 0.00110111 | 0.000628487 |
| Proteobacteria   | Massilia                                                  | 0      | 0.7849 | 0.2151 | 0        | 0.00240707 | 0.000659523 |
| Firmicutes       | [Bacteroides]_pectinophilus_group                         | 1      | 0      | 0      | 0.001183 | 0          | 0           |
| Proteobacteria   | Roseomonas                                                | 0      | 1      | 0      | 0        | 0.00234732 | 0           |
| Spirochaetae     | Treponema_2                                               | 0      | 0.2921 | 0.7079 | 0        | 7.68E-05   | 0.000186218 |
| Gemmatimonadetes | uncultured_bacterium_c_S0134_terrestrial_group            | 0      | 0.3204 | 0.6796 | 0        | 5.12E-05   | 0.000108627 |
| Proteobacteria   | Peredibacter                                              | 1      | 0      | 0      | 0.00081  | 0          | 0           |
| Firmicutes       | [Eubacterium]_ruminantium_group                           | 0.8509 | 0.0903 | 0.0589 | 0.003701 | 0.00039264 | 0.00025605  |
| Firmicutes       | Lachnospiraceae_NC2004_group                              | 0.6348 | 0.0707 | 0.2945 | 0.00092  | 0.00010243 | 0.00042675  |
| Actinobacteria   | Microbacterium                                            | 0.0509 | 0.5161 | 0.433  | 2.19E-05 | 0.00022193 | 0.000186218 |
| Bacteroidetes    | uncultured_bacterium_f_AKYH767                            | 0      | 0.4044 | 0.5956 | 0        | 0.0014596  | 0.002149269 |

|                |                                                       |        |        |        |          |            |             |
|----------------|-------------------------------------------------------|--------|--------|--------|----------|------------|-------------|
| Proteobacteria | Paucibacter                                           | 0      | 0.9478 | 0.0522 | 0        | 0.00028168 | 1.55E-05    |
| Bacteroidetes  | Prevotella_9                                          | 0      | 0.3834 | 0.6166 | 0        | 0.00011096 | 0.000178459 |
| Proteobacteria | uncultured_bacterium_f_I-10                           | 0      | 0.6672 | 0.3328 | 0        | 0.002629   | 0.001311287 |
| Proteobacteria | Arenimonas                                            | 0      | 0.6704 | 0.3296 | 0        | 0.001673   | 0.000822464 |
| Acidobacteria  | PAUC26f                                               | 0      | 1      | 0      | 0        | 0.00017925 | 0           |
| Firmicutes     | Anaerotruncus                                         | 0.8574 | 0.0341 | 0.1085 | 0.002146 | 8.54E-05   | 0.000271568 |
| Chloroflexi    | uncultured_bacterium_o_JG30-KF-CM45                   | 0      | 0      | 1      | 0        | 0          | 0.000201736 |
| Firmicutes     | Veillonella                                           | 0.7257 | 0.1886 | 0.0857 | 0.000263 | 6.83E-05   | 3.10E-05    |
| Firmicutes     | Clostridium_sensu_stricto_3                           | 0      | 0      | 1      | 0        | 0          | 0.000178459 |
| Proteobacteria | uncultured_bacterium_o_SC-I-84                        | 0      | 0.596  | 0.404  | 0        | 0.00302164 | 0.002048401 |
| Firmicutes     | Lactobacillus                                         | 0.658  | 0.0878 | 0.2542 | 0.190277 | 0.02537664 | 0.073501913 |
| Proteobacteria | Desulfovibrio                                         | 0.7242 | 0.1197 | 0.1562 | 0.002015 | 0.00033289 | 0.000434509 |
| Proteobacteria | Serratia                                              | 0.8362 | 0.0128 | 0.151  | 0.001117 | 1.71E-05   | 0.000201736 |
| Cyanobacteria  | uncultured_bacterium_c_Chloroplast                    | 0.6168 | 0.3761 | 0.007  | 0.001358 | 0.00082796 | 1.55E-05    |
| Firmicutes     | [Clostridium]_innocuum_group                          | 0.8101 | 0.0243 | 0.1656 | 0.000569 | 1.71E-05   | 0.000116386 |
| Chlamydiae     | Neochlamydia                                          | 0      | 0.4445 | 0.5555 | 0        | 6.83E-05   | 8.54E-05    |
| Bacteroidetes  | uncultured_bacterium_o_Sphingobacteriales             | 0      | 0.7999 | 0.2001 | 0        | 0.00161325 | 0.000403473 |
| Actinobacteria | uncultured_bacterium_f_Coriobacteriaceae              | 0.7511 | 0.1025 | 0.1464 | 0.000438 | 5.97E-05   | 8.54E-05    |
| Planctomycetes | uncultured_bacterium_c_OM190                          | 0      | 0.497  | 0.503  | 0        | 0.00346549 | 0.003507111 |
| Acidobacteria  | uncultured_bacterium_f_Acidobacteriaceae_[Subgroup_1] | 0      | 0.636  | 0.364  | 0        | 0.00023046 | 0.000131905 |
| Elusimicrobia  | uncultured_bacterium_o_Lineage_Ila                    | 0      | 1      | 0      | 0        | 0.00017071 | 0           |
| Proteobacteria | uncultured_bacterium_f_TK34                           | 0      | 0.627  | 0.373  | 0        | 0.00069139 | 0.000411232 |
| Bacteroidetes  | uncultured_bacterium_c_Bacteroidetes_vadinHA17        | 0.965  | 0.035  | 0      | 0.000942 | 3.41E-05   | 0           |
| Firmicutes     | Erysipelatoclostridium                                | 1      | 0      | 0      | 0.000547 | 0          | 0           |
| Nitrospirae    | Unclassified                                          | 0      | 0.4158 | 0.5842 | 0        | 9.39E-05   | 0.000131905 |
| Actinobacteria | Quadriflustra                                         | 0      | 0.1416 | 0.8584 | 0        | 2.56E-05   | 0.000155182 |
| Proteobacteria | uncultured_bacterium_f_Thiotrichaceae                 | 0      | 1      | 0      | 0        | 0.00022193 | 0           |
| Firmicutes     | Roseburia                                             | 0.4854 | 0.151  | 0.3636 | 0.002496 | 0.00077675 | 0.001869942 |
| Firmicutes     | Coprococcus_1                                         | 0      | 0.171  | 0.829  | 0        | 2.56E-05   | 0.000124146 |



|                  |                                                       |        |        |        |          |            |             |
|------------------|-------------------------------------------------------|--------|--------|--------|----------|------------|-------------|
| Firmicutes       | Ruminococcus_1                                        | 0.5519 | 0.0454 | 0.4027 | 0.008825 | 0.00072553 | 0.006440049 |
| Proteobacteria   | Comamonas                                             | 0.8187 | 0.133  | 0.0483 | 0.000263 | 4.27E-05   | 1.55E-05    |
| Gemmatimonadetes | uncultured_bacterium_f_Gemmatimonadaceae              | 0.0009 | 0.6424 | 0.3567 | 2.19E-05 | 0.01533012 | 0.008511728 |
| Proteobacteria   | uncultured_bacterium_o_Rhizobiales                    | 0      | 0.7675 | 0.2325 | 0        | 0.00025607 | 7.76E-05    |
| Proteobacteria   | Inquilinus                                            | 0      | 0.4177 | 0.5823 | 0        | 0.00012804 | 0.000178459 |
| Firmicutes       | Marvinbryantia                                        | 0      | 0      | 1      | 0        | 0          | 0.000232773 |
| Firmicutes       | Unclassified                                          | 0.4879 | 0.1018 | 0.4102 | 0.015745 | 0.00328624 | 0.013237017 |
| Proteobacteria   | Polyangium                                            | 0      | 0.5946 | 0.4054 | 0        | 0.00010243 | 6.98E-05    |
| Proteobacteria   | Escherichia-Shigella                                  | 0.7834 | 0.0474 | 0.1692 | 0.015088 | 0.00091332 | 0.00325882  |
| Bacteroidetes    | uncultured_bacterium_f_Bacteroidales_S24-7_group      | 0.5344 | 0.1146 | 0.351  | 0.055491 | 0.01189877 | 0.036452231 |
| Proteobacteria   | uncultured_bacterium_f_Xanthomonadales_Incertae_Sedis | 0.0896 | 0.4421 | 0.4683 | 0.002781 | 0.01372541 | 0.014540545 |
| Chlorobi         | uncultured_bacterium_f_OPB56                          | 0      | 0.7591 | 0.2409 | 0        | 0.00198028 | 0.000628487 |
| Spirochaetae     | uncultured_bacterium_f_Leptospiraceae                 | 0.4378 | 0.5622 | 0      | 0.000372 | 0.000478   | 0           |
| Actinobacteria   | uncultured_bacterium_f_Euzebyaceae                    | 0.6923 | 0.1237 | 0.184  | 0.000526 | 9.39E-05   | 0.000139664 |
| Acidobacteria    | uncultured_bacterium_f_ABS-19                         | 0      | 0.5525 | 0.4475 | 0        | 0.00046946 | 0.000380196 |
| Proteobacteria   | Hirschia                                              | 0.0399 | 0.4946 | 0.4655 | 0.000547 | 0.00678588 | 0.006385736 |
| Bacteroidetes    | Unclassified                                          | 0      | 0.6894 | 0.3106 | 0        | 0.00580428 | 0.002614815 |
| Actinobacteria   | Micrococcus                                           | 0.3066 | 0.6437 | 0.0497 | 0.001533 | 0.00321796 | 0.000248291 |
| Cyanobacteria    | Unclassified                                          | 0.3574 | 0.1393 | 0.5033 | 0.000854 | 0.00033289 | 0.00120266  |
| Proteobacteria   | Candidatus_Odyssella                                  | 0      | 0.453  | 0.547  | 0        | 0.0005975  | 0.000721596 |
| Proteobacteria   | uncultured_organism                                   | 0      | 0.3204 | 0.6796 | 0        | 5.12E-05   | 0.000108627 |
| Bacteroidetes    | Chryseolinea                                          | 0      | 0.3922 | 0.6078 | 0        | 0.00066578 | 0.00103196  |
| Acidobacteria    |                                                       | 0.0072 | 0.6651 | 0.3277 | 2.19E-05 | 0.0020315  | 0.001000923 |
| Tenericutes      | uncultured_bacterium_o_Mollicutes_RF9                 | 0.6129 | 0.098  | 0.2891 | 0.009395 | 0.00150228 | 0.004430444 |
| Acidobacteria    | Paludibaculum                                         | 0.1382 | 0.3258 | 0.536  | 0.000438 | 0.00103282 | 0.001699242 |
| Bacteroidetes    | uncultured_bacterium_f_NS11-12_marine_group           | 0      | 0.3337 | 0.6663 | 0        | 0.00052068 | 0.001039719 |
| Proteobacteria   | Bosea                                                 | 0      | 0.3976 | 0.6024 | 0        | 0.00038411 | 0.000581932 |
| Spirochaetae     | Brevinema                                             | 0      | 0      | 1      | 0        | 0          | 0.000302605 |
| Firmicutes       | Staphylococcus                                        | 0.4267 | 0.2623 | 0.311  | 0.002694 | 0.00165593 | 0.001963051 |

|                 |                                                |        |        |        |          |            |             |
|-----------------|------------------------------------------------|--------|--------|--------|----------|------------|-------------|
| Chloroflexi     | uncultured_bacterium_c_Ardenticatenia          | 0      | 0.6433 | 0.3567 | 0        | 0.00085357 | 0.000473305 |
| Bacteroidetes   | uncultured_bacterium_f_env.OPS_17              | 0      | 0.6758 | 0.3242 | 0        | 0.00122914 | 0.000589691 |
| Chloroflexi     | uncultured_Chloroflexi_bacterium               | 0      | 0.8075 | 0.1925 | 0        | 0.00052068 | 0.000124146 |
| Proteobacteria  | uncultured_bacterium_f_KD3-10                  | 0      | 0.6875 | 0.3125 | 0        | 0.00029021 | 0.000131905 |
| Firmicutes      | Trichococcus                                   | 0.9762 | 0.0026 | 0.0212 | 0.003219 | 8.54E-06   | 6.98E-05    |
| Proteobacteria  | Azoarcus                                       | 0      | 0.0207 | 0.9793 | 0        | 8.54E-06   | 0.000403473 |
| Bacteroidetes   | Ferruginibacter                                | 0      | 0.6413 | 0.3587 | 0        | 0.00011096 | 6.21E-05    |
| Proteobacteria  | Candidatus_Alysiosphaera                       | 0      | 0.6673 | 0.3327 | 0        | 0.00052921 | 0.000263809 |
| Armatimonadetes | uncultured_bacterium_o_Armatimonadales         | 0      | 1      | 0      | 0        | 0.0005975  | 0           |
| Firmicutes      | Peptoniphilus                                  | 0      | 0.9678 | 0.0322 | 0        | 0.00069993 | 2.33E-05    |
| Proteobacteria  | Pseudomonas                                    | 0.0379 | 0.6512 | 0.3109 | 0.000394 | 0.00677735 | 0.003235543 |
| Chloroflexi     | uncultured_bacterium_c_KD4-96                  | 0.0241 | 0.5935 | 0.3824 | 0.000109 | 0.00269728 | 0.001738037 |
| Omnitrophica    | uncultured_bacterium_p_Omnitrophica            | 0      | 0.6147 | 0.3853 | 0        | 0.00024754 | 0.000155182 |
| Microgenomates  | uncultured_bacterium_c_Candidatus_Levybacteria | 0      | 0.3667 | 0.6333 | 0        | 0.00017071 | 0.000294846 |
| Proteobacteria  | uncultured_bacterium_f_Hyphomicrobiaceae       | 0      | 0.7536 | 0.2464 | 0        | 0.00237292 | 0.00077591  |
| Proteobacteria  | Rhodobacter                                    | 0      | 0.9941 | 0.0059 | 0        | 0.00129743 | 7.76E-06    |
| Firmicutes      | uncultured_bacterium_f_Ruminococcaceae         | 0.785  | 0.0501 | 0.1649 | 0.008825 | 0.00056336 | 0.001854424 |
| Proteobacteria  | Rhodovarius                                    | 0      | 1      | 0      | 0        | 0.00029021 | 0           |
| Acidobacteria   | uncultured_bacterium_c_Subgroup_11             | 0      | 0.6875 | 0.3125 | 0        | 0.00032436 | 0.000147423 |
| Actinobacteria  | uncultured_bacterium_f_Sporichthyaceae         | 0      | 0.7757 | 0.2243 | 0        | 0.00018779 | 5.43E-05    |
| Actinobacteria  | Rhodococcus                                    | 0.4018 | 0.2243 | 0.3739 | 0.037731 | 0.02106611 | 0.035117667 |
| Proteobacteria  | Ralstonia                                      | 0.8596 | 0.0558 | 0.0846 | 0.000394 | 2.56E-05   | 3.88E-05    |
| Acidobacteria   | uncultured_bacterium_c_Subgroup_22             | 0      | 0.4761 | 0.5239 | 0        | 0.00016218 | 0.000178459 |
| Proteobacteria  | Methylobacterium                               | 0      | 0.171  | 0.829  | 0        | 0.00012804 | 0.000620728 |
| Bacteroidetes   | Niastella                                      | 0.1622 | 0.4907 | 0.3471 | 0.002124 | 0.00642738 | 0.00454683  |
| Actinobacteria  | Blastococcus                                   | 0.1795 | 0.4548 | 0.3657 | 8.76E-05 | 0.00022193 | 0.000178459 |
| Proteobacteria  | uncultured_bacterium_o_HTA4                    | 0      | 0.9732 | 0.0268 | 0        | 0.00028168 | 7.76E-06    |
| Bacteroidetes   | Rikenellaceae_RC9_gut_group                    | 0      | 0.278  | 0.722  | 0        | 5.97E-05   | 0.000155182 |
| Acidobacteria   | Unclassified                                   | 0.0474 | 0.5343 | 0.4183 | 0.003876 | 0.04369425 | 0.034202093 |

|                 |                                                       |        |        |        |          |            |             |
|-----------------|-------------------------------------------------------|--------|--------|--------|----------|------------|-------------|
| Proteobacteria  | Phaselicystis                                         | 0      | 0.5518 | 0.4482 | 0        | 0.00272289 | 0.002211342 |
| Proteobacteria  | uncultured_bacterium_f_Rhodospirillaceae              | 0.0774 | 0.5054 | 0.4171 | 0.001292 | 0.00843327 | 0.006959909 |
| Chloroflexi     | uncultured_bacterium_o_Ardenticatenales               | 0      | 0.5238 | 0.4762 | 0        | 0.00014511 | 0.000131905 |
| Actinobacteria  | Solirubrobacter                                       | 0      | 0.557  | 0.443  | 0        | 0.00109257 | 0.000869019 |
| Proteobacteria  | Pasteurella                                           | 0      | 0.0547 | 0.9453 | 0        | 8.54E-06   | 0.000147423 |
| Bacteroidetes   | Alloprevotella                                        | 0.6624 | 0.1475 | 0.19   | 0.00046  | 0.00010243 | 0.000131905 |
| Proteobacteria  | uncultured_bacterium_f_Rhodobiaceae                   | 0      | 0.2259 | 0.7741 | 0        | 0.00011096 | 0.000380196 |
| Fusobacteria    | Cetobacterium                                         | 0.8428 | 0      | 0.1572 | 0.000416 | 0          | 7.76E-05    |
| Proteobacteria  | uncultured_bacterium_o_TRA3-20                        | 0.0071 | 0.5655 | 0.4274 | 0.000131 | 0.01048184 | 0.007922037 |
| Actinobacteria  | Virgisporangium                                       | 0.541  | 0.246  | 0.213  | 0.000394 | 0.00017925 | 0.000155182 |
| Proteobacteria  | uncultured_bacterium_f_Sandaracinaceae                | 0.029  | 0.4283 | 0.5427 | 0.000416 | 0.00615424 | 0.007797891 |
| Acidobacteria   | uncultured_bacterium_c_Subgroup_18                    | 0      | 0.3228 | 0.6772 | 0        | 0.00011096 | 0.000232773 |
| Verrucomicrobia | Terrimicrobium                                        | 0      | 0.6111 | 0.3889 | 0        | 0.00017071 | 0.000108627 |
| Proteobacteria  | Castellaniella                                        | 1      | 0      | 0      | 0.000854 | 0          | 0           |
| Acidobacteria   | uncultured_bacterium_f_Blastocatellaceae_[Subgroup_4] | 0      | 0.6474 | 0.3526 | 0        | 0.00232171 | 0.001264733 |
| Firmicutes      | Ruminiclostridium_9                                   | 0.4554 | 0.0775 | 0.4671 | 0.00311  | 0.00052921 | 0.003188988 |
| Proteobacteria  | uncultured_bacterium_f_Alcaligenaceae                 | 0      | 0.518  | 0.482  | 0        | 0.0003585  | 0.000333641 |
| Proteobacteria  | uncultured_bacterium_f_Oligoflexaceae                 | 0      | 1      | 0      | 0        | 0.00015364 | 0           |
| Actinobacteria  | Dietzia                                               | 0      | 0.372  | 0.628  | 0        | 5.97E-05   | 0.000100868 |
| Proteobacteria  | uncultured_bacterium_o_SAR324_clade[Marine_group_B]   | 0      | 1      | 0      | 0        | 0.00030729 | 0           |
| Cyanobacteria   | uncultured_bacterium_o_Vampirovibrionales             | 0.99   | 0.0012 | 0.0088 | 0.006986 | 8.54E-06   | 6.21E-05    |
| Actinobacteria  | Coriobacteriaceae_UCG-002                             | 0.5692 | 0.213  | 0.2178 | 0.001095 | 0.00040971 | 0.000418991 |
| Elusimicrobia   | Unclassified                                          | 0.27   | 0.5578 | 0.1722 | 0.000219 | 0.00045239 | 0.000139664 |
| Proteobacteria  | Aquicella                                             | 0.1352 | 0.6478 | 0.217  | 0.000372 | 0.00178396 | 0.00059745  |
| Acidobacteria   | Stenotrophobacter                                     | 0      | 0.5437 | 0.4563 | 0        | 0.00022193 | 0.000186218 |
| Chlamydiae      | Unclassified                                          | 0      | 0      | 1      | 0        | 0          | 0.000147423 |
| Proteobacteria  | uncultured_bacterium_o_Rickettsiales                  | 0      | 0      | 1      | 0        | 0          | 0.000418991 |
| Firmicutes      | Subdoligranulum                                       | 0.4903 | 0.1911 | 0.3185 | 0.000131 | 5.12E-05   | 8.54E-05    |
| Proteobacteria  | Hydrogenophaga                                        | 0.6273 | 0.0719 | 0.3007 | 0.000372 | 4.27E-05   | 0.000178459 |

|                           |                                                  |        |        |        |          |            |             |
|---------------------------|--------------------------------------------------|--------|--------|--------|----------|------------|-------------|
| Bacteroidetes             | uncultured_bacterium_f_NS9_marine_group          | 0      | 0.7447 | 0.2553 | 0        | 0.00097307 | 0.000333641 |
| Firmicutes                | Ruminococcaceae_UCG-010                          | 0.6561 | 0.0058 | 0.3381 | 0.001927 | 1.71E-05   | 0.000993164 |
| Planctomycetes            | Unclassified                                     | 0      | 0.47   | 0.53   | 0        | 0.00248389 | 0.002801034 |
| Proteobacteria            | uncultured_bacterium_f_Nitrosomonadaceae         | 0.0629 | 0.5135 | 0.4236 | 0.003329 | 0.02718621 | 0.022423786 |
| Chloroflexi               | uncultured_bacterium_c_JG30-KF-CM66              | 0      | 0.5116 | 0.4884 | 0        | 0.00034143 | 0.000325882 |
| Proteobacteria            | Haliea                                           | 0      | 0.8288 | 0.1712 | 0        | 0.00018779 | 3.88E-05    |
| Planctomycetes            | SM1A02                                           | 0      | 0.7071 | 0.2929 | 0        | 0.0025095  | 0.001039719 |
| Actinobacteria            | Unclassified                                     | 0.2549 | 0.3845 | 0.3606 | 0.002672 | 0.00402885 | 0.00377868  |
| Verrucomicrobia           | Chthoniobacter                                   | 0.1818 | 0.3356 | 0.4826 | 0.001073 | 0.00198028 | 0.002847588 |
| Proteobacteria            | Devosia                                          | 0.1283 | 0.5836 | 0.288  | 0.00046  | 0.00209125 | 0.00103196  |
| Candidatus_Berkelbacteria | uncultured_bacterium_p_Candidatus_Berkelbacteria | 0      | 0.5902 | 0.4098 | 0        | 0.00061457 | 0.00042675  |
| Verrucomicrobia           | Akkermansia                                      | 0      | 0.6545 | 0.3455 | 0        | 0.00026461 | 0.000139664 |
| Proteobacteria            | Lautropia                                        | 0      | 0.7723 | 0.2277 | 0        | 0.00031582 | 9.31E-05    |
| Proteobacteria            | Polycyclovorans                                  | 0.0137 | 0.5828 | 0.4034 | 2.19E-05 | 0.00093039 | 0.000644005 |
| Parcubacteria             | Unclassified                                     | 0      | 0.2391 | 0.7609 | 0        | 3.41E-05   | 0.000108627 |
| Firmicutes                | Ruminococcaceae_NK4A214_group                    | 0.4685 | 0.088  | 0.4435 | 0.003    | 0.00056336 | 0.002839829 |
| Bacteroidetes             | Sediminibacterium                                | 0      | 0.8413 | 0.1587 | 0        | 0.00045239 | 8.54E-05    |
| Bacteroidetes             | Fluviicola                                       | 0      | 0.3549 | 0.6451 | 0        | 0.00020486 | 0.000372437 |
| Chloroflexi               | uncultured_bacterium_c_S085                      | 0      | 0.5599 | 0.4401 | 0        | 0.00126328 | 0.000993164 |
| Cyanobacteria             | Solanum_torvum                                   | 0.9155 | 0.0845 | 0      | 0.000832 | 7.68E-05   | 0           |
| Actinobacteria            | Sporichthya                                      | 0      | 0.6552 | 0.3448 | 0        | 0.00048653 | 0.00025605  |
| Cyanobacteria             | Nicotiana_otophora                               | 0.8725 | 0.0994 | 0.028  | 0.169627 | 0.01933336 | 0.005446885 |
| Actinobacteria            | Asaccharobacter                                  | 0.1089 | 0.0424 | 0.8487 | 2.19E-05 | 8.54E-06   | 0.0001707   |
| Bacteroidetes             | Flavisolibacter                                  | 0      | 0.3178 | 0.6822 | 0        | 0.00040118 | 0.00086126  |
| Verrucomicrobia           | Unclassified                                     | 0.7301 | 0.2474 | 0.0225 | 0.000504 | 0.00017071 | 1.55E-05    |
| Proteobacteria            | Paracoccus                                       | 0.0116 | 0.8163 | 0.1722 | 2.19E-05 | 0.00154496 | 0.000325882 |
| Proteobacteria            | uncultured_bacterium_f_Comamonadaceae            | 0      | 0.6249 | 0.3751 | 0        | 0.00045239 | 0.000271568 |
| Bacteroidetes             | Solitalea                                        | 0      | 0.3669 | 0.6331 | 0        | 0.00050361 | 0.000869019 |
| Firmicutes                | Faecalibaculum                                   | 0.6474 | 0.1391 | 0.2135 | 0.02757  | 0.00592378 | 0.00909366  |

|                  |                                                 |        |        |        |          |            |             |
|------------------|-------------------------------------------------|--------|--------|--------|----------|------------|-------------|
| Firmicutes       | Turicibacter                                    | 0.2308 | 0.0934 | 0.6758 | 0.001161 | 0.00046946 | 0.003398484 |
| Proteobacteria   | Sphingobium                                     | 0.0518 | 0.6759 | 0.2723 | 0.000569 | 0.0074346  | 0.002995011 |
| Firmicutes       | Ruminiclostridium_5                             | 0.7362 | 0.0327 | 0.2311 | 0.003263 | 0.00014511 | 0.001024201 |
| Bacteroidetes    | uncultured_Bacteroidetes_bacterium              | 0      | 0.6617 | 0.3383 | 0        | 0.00013657 | 6.98E-05    |
| Proteobacteria   | Agaricicola                                     | 0      | 0.962  | 0.038  | 0        | 0.00019632 | 7.76E-06    |
| Firmicutes       | Bacillus                                        | 0.2391 | 0.3542 | 0.4067 | 0.000328 | 0.00048653 | 0.000558655 |
| Firmicutes       | Kurthia                                         | 0      | 0.6343 | 0.3657 | 0        | 0.00034996 | 0.000201736 |
| Proteobacteria   | Variovorax                                      | 0      | 0.8319 | 0.1681 | 0        | 0.00038411 | 7.76E-05    |
| Gemmatimonadetes | uncultured_bacterium_c_BD2-11_terrestrial_group | 0      | 0.6122 | 0.3878 | 0        | 0.00028168 | 0.000178459 |
| Proteobacteria   | Acidibacter                                     | 0.095  | 0.5987 | 0.3063 | 0.003416 | 0.0215185  | 0.011010157 |
| Proteobacteria   | Desulfatiglans                                  | 0      | 0      | 1      | 0        | 0          | 0.000225014 |
| Verrucomicrobia  | uncultured_bacterium_f_Verrucomicrobiaceae      | 0      | 0.6836 | 0.3164 | 0        | 0.00046946 | 0.000217255 |
| Proteobacteria   | Candidatus_Xenohalotis                          | 0      | 0      | 1      | 0        | 0          | 0.000178459 |
| Firmicutes       | Ruminococcaceae_UCG-004                         | 0.5538 | 0.0116 | 0.4346 | 0.003263 | 6.83E-05   | 0.002560502 |
| Actinobacteria   | uncultured_bacterium_o_Acidimicrobiales         | 0.1076 | 0.4352 | 0.4573 | 0.002475 | 0.01001238 | 0.010521334 |
| Bacteroidetes    | uncultured_bacterium_c_SM1A07                   | 0      | 0.2683 | 0.7317 | 0        | 7.68E-05   | 0.000209496 |
| Actinobacteria   | Promicromonospora                               | 0      | 0.5641 | 0.4359 | 0        | 0.00017071 | 0.000131905 |
| Proteobacteria   | Delftia                                         | 0      | 0.1865 | 0.8135 | 0        | 4.27E-05   | 0.000186218 |
| Acidobacteria    | uncultured_bacterium_c_Subgroup_17              | 0.0833 | 0.5266 | 0.3901 | 0.000197 | 0.00124621 | 0.000923332 |
| Actinobacteria   | Enterorhabdus                                   | 0.7366 | 0.0261 | 0.2373 | 0.000241 | 8.54E-06   | 7.76E-05    |
| Proteobacteria   | Aeromonas                                       | 0      | 0.1822 | 0.8178 | 0        | 0.00013657 | 0.000612969 |
| Bacteroidetes    | Chryseobacterium                                | 0.0014 | 0.9931 | 0.0055 | 2.19E-05 | 0.0154923  | 8.54E-05    |
| Actinobacteria   | Ilumatobacter                                   | 0.0153 | 0.5443 | 0.4404 | 2.19E-05 | 0.00077675 | 0.000628487 |
| Cyanobacteria    | Microcystis                                     | 0      | 1      | 0      | 0        | 0.0592719  | 0           |
| Bacteroidetes    | uncultured_bacterium_f_PHOS-HE51                | 0      | 0.4191 | 0.5809 | 0        | 0.00190346 | 0.002638093 |
| Spirochaetae     | Turneriella                                     | 0.1725 | 0.4455 | 0.382  | 0.000175 | 0.00045239 | 0.000387955 |
| Actinobacteria   | Actinophytocola                                 | 0.8924 | 0.0105 | 0.0971 | 0.003635 | 4.27E-05   | 0.000395714 |
| Proteobacteria   | Noviherbaspirillum                              | 0      | 0.5925 | 0.4075 | 0        | 0.00031582 | 0.000217255 |
| Planctomycetes   | uncultured_bacterium_f_Planctomycetaceae        | 0      | 0.2764 | 0.7236 | 0        | 0.00021339 | 0.000558655 |

|                  |                                        |        |        |        |          |            |             |
|------------------|----------------------------------------|--------|--------|--------|----------|------------|-------------|
| Proteobacteria   | uncultured_bacterium_o_X35             | 0      | 0.3549 | 0.6451 | 0        | 5.12E-05   | 9.31E-05    |
| Proteobacteria   | Alicyclophilus                         | 0      | 0      | 1      | 0        | 0          | 0.000155182 |
| Firmicutes       | Dialister                              | 0      | 1      | 0      | 0        | 0.00033289 | 0           |
| Proteobacteria   | Porphyrobacter                         | 0      | 0.9812 | 0.0188 | 0        | 0.00162178 | 3.10E-05    |
| Proteobacteria   | uncultured_bacterium_f_Coxiellaceae    | 0      | 1      | 0      | 0        | 0.00041825 | 0           |
| GAL15            | uncultured_bacterium_p_GAL15           | 0      | 0.3909 | 0.6091 | 0        | 5.97E-05   | 9.31E-05    |
| Proteobacteria   | Raoultella                             | 0.2369 | 0.7452 | 0.018  | 0.000307 | 0.00096453 | 2.33E-05    |
| Proteobacteria   | Sorangium                              | 0      | 0.6166 | 0.3834 | 0        | 0.00213393 | 0.001326805 |
| Saccharibacteria | Candidatus_Saccharimonas               | 0.5353 | 0.0948 | 0.3699 | 0.00265  | 0.00046946 | 0.001831147 |
| Proteobacteria   | uncultured_bacterium_f_MNC12           | 0      | 0.4445 | 0.5555 | 0        | 6.83E-05   | 8.54E-05    |
| Armatimonadetes  | uncultured_bacterium_p_Armatimonadetes | 0      | 0.5395 | 0.4605 | 0        | 0.00098161 | 0.000837982 |
| Actinobacteria   | Corynebacterium_1                      | 0.2996 | 0.3745 | 0.3258 | 0.000635 | 0.00079382 | 0.00069056  |
| Firmicutes       | Finegoldia                             | 0      | 0.7705 | 0.2295 | 0        | 0.00049507 | 0.000147423 |
| Proteobacteria   | Arcobacter                             | 1      | 0      | 0      | 0.001095 | 0          | 0           |
| Proteobacteria   | Enhydrobacter                          | 0      | 0.8607 | 0.1393 | 0        | 0.00124621 | 0.000201736 |
| Proteobacteria   | uncultured_bacterium_f_Moraxellaceae   | 0      | 0.2996 | 0.7004 | 0        | 0.0001195  | 0.000279327 |
| Proteobacteria   | Skermanella                            | 0      | 0.2529 | 0.7471 | 0        | 6.83E-05   | 0.000201736 |
| Actinobacteria   | CL500-29_marine_group                  | 0.0264 | 0.6081 | 0.3654 | 2.19E-05 | 0.00050361 | 0.000302605 |
| Firmicutes       | Ruminococcaceae_UCG-014                | 0.3821 | 0.0435 | 0.5744 | 0.023891 | 0.00272289 | 0.035916854 |
| Firmicutes       | Pediococcus                            | 1      | 0      | 0      | 0.001117 | 0          | 0           |
| Proteobacteria   | Dongia                                 | 0.1539 | 0.4718 | 0.3743 | 0.000964 | 0.00295335 | 0.002343247 |
| Verrucomicrobia  | Candidatus_Methylophilum               | 0      | 0.1209 | 0.8791 | 0        | 1.71E-05   | 0.000124146 |
| Acidobacteria    | uncultured_bacterium_c_AT-s3-28        | 0      | 0.171  | 0.829  | 0        | 2.56E-05   | 0.000124146 |
| Actinobacteria   | Glutamicibacter                        | 0.0401 | 0.5594 | 0.4005 | 0.000109 | 0.00152789 | 0.001094032 |
| Bacteroidetes    | uncultured_bacterium_f_Cytophagaceae   | 0.0377 | 0.4564 | 0.5059 | 0.002518 | 0.03049806 | 0.03380638  |
| Firmicutes       | uncultured_bacterium_f_Eubacteriaceae  | 0.8597 | 0.1403 | 0      | 0.000942 | 0.00015364 | 0           |
| Bacteroidetes    | Chitinophaga                           | 0      | 0.6627 | 0.3373 | 0        | 0.00021339 | 0.000108627 |
| Proteobacteria   | Lysobacter                             | 0      | 0.4076 | 0.5924 | 0        | 0.00417396 | 0.006067613 |
| Firmicutes       | Anaerovorax                            | 0.5378 | 0.0135 | 0.4487 | 0.000679 | 1.71E-05   | 0.000566414 |

|                           |                                                  |        |        |        |          |            |             |
|---------------------------|--------------------------------------------------|--------|--------|--------|----------|------------|-------------|
| Proteobacteria            | Amaricoccus                                      | 0      | 0      | 1      | 0        | 0          | 0.000395714 |
| Synergistetes             | uncultured_bacterium_f_Synergistaceae            | 1      | 0      | 0      | 0.000482 | 0          | 0           |
| Planctomycetes            | CL500-3                                          | 0      | 0.9898 | 0.0102 | 0        | 0.00827109 | 8.54E-05    |
| Bacteroidetes             | Prevotella_1                                     | 0      | 0.4231 | 0.5769 | 0        | 0.00010243 | 0.000139664 |
| Chloroflexi               | uncultured_bacterium_c_P2-11E                    | 0      | 0.2391 | 0.7609 | 0        | 3.41E-05   | 0.000108627 |
| Proteobacteria            | G55                                              | 0      | 0.5684 | 0.4316 | 0        | 0.00067432 | 0.0005121   |
| Proteobacteria            | uncultured_bacterium_o_KI89A_clade               | 0      | 0.5    | 0.5    | 0        | 0.00017071 | 0.0001707   |
| Proteobacteria            | Acinetobacter                                    | 0.08   | 0.5959 | 0.3241 | 0.000547 | 0.00408006 | 0.002219101 |
| Chloroflexi               | Unclassified                                     | 0      | 0.6651 | 0.3349 | 0        | 0.00396057 | 0.001994088 |
| Actinobacteria            | Bifidobacterium                                  | 0.6446 | 0.1057 | 0.2497 | 0.014322 | 0.00234732 | 0.005547753 |
| Saccharibacteria          | uncultured_Candidatus_Saccharibacteria_bacterium | 0      | 0.4905 | 0.5095 | 0        | 0.00017925 | 0.000186218 |
| Proteobacteria            | uncultured_bacterium_f_B79                       | 0      | 0.5475 | 0.4525 | 0        | 9.39E-05   | 7.76E-05    |
| Proteobacteria            | Oligella                                         | 1      | 0      | 0      | 0.000613 | 0          | 0           |
| Firmicutes                | Listeria                                         | 0      | 0.8189 | 0.1811 | 0        | 0.00031582 | 6.98E-05    |
| Gemmatimonadetes          | Unclassified                                     | 0.0445 | 0.6244 | 0.3311 | 2.19E-05 | 0.00030729 | 0.000162941 |
| Proteobacteria            | Wolbachia                                        | 0      | 0.1146 | 0.8854 | 0        | 1.71E-05   | 0.000131905 |
| Candidatus_Berkelbacteria | Unclassified                                     | 0      | 0.5238 | 0.4762 | 0        | 7.68E-05   | 6.98E-05    |
| Acidobacteria             | Vicinamibacter                                   | 0.0795 | 0.518  | 0.4025 | 0.000307 | 0.00199735 | 0.001551819 |
| Proteobacteria            | Methylothera                                     | 0      | 0.7777 | 0.2223 | 0        | 0.00165593 | 0.000473305 |
| Firmicutes                | Ruminococcaceae_UCG-003                          | 0.9167 | 0.0404 | 0.0429 | 0.001161 | 5.12E-05   | 5.43E-05    |
| Proteobacteria            | uncultured_bacterium_f_Methylobacteriaceae       | 0      | 0.8198 | 0.1802 | 0        | 0.00077675 | 0.0001707   |
| Tenericutes               | Mycoplasma                                       | 0.4722 | 0.0056 | 0.5222 | 0.000723 | 8.54E-06   | 0.000799187 |
| Planctomycetes            | AKYG587                                          | 0      | 0.8148 | 0.1852 | 0        | 0.00017071 | 3.88E-05    |
| Fusobacteria              | Fusobacterium                                    | 0.5178 | 0.1294 | 0.3528 | 0.000854 | 0.00021339 | 0.000581932 |
| Firmicutes                | Weissella                                        | 0.1445 | 0.1112 | 0.7443 | 0.000854 | 0.00065725 | 0.004399407 |
| Firmicutes                | Allobaculum                                      | 0.5656 | 0.0817 | 0.3527 | 0.041104 | 0.00594085 | 0.025628293 |
| Actinobacteria            | Agromyces                                        | 0      | 0.092  | 0.908  | 0        | 0.00023046 | 0.002273415 |
| Actinobacteria            | Streptomyces                                     | 0.1833 | 0.5277 | 0.2891 | 0.000679 | 0.00195468 | 0.001070755 |
| Verrucomicrobia           | uncultured_bacterium_f_DA101_soil_group          | 0      | 0.2612 | 0.7388 | 0        | 0.00015364 | 0.000434509 |

|                 |                                          |        |        |        |          |            |             |
|-----------------|------------------------------------------|--------|--------|--------|----------|------------|-------------|
| Proteobacteria  | uncultured_bacterium_f_Xanthobacteraceae | 0      | 0.602  | 0.398  | 0        | 0.00037557 | 0.000248291 |
| Acidobacteria   | uncultured_bacterium_c_Subgroup_25       | 1      | 0      | 0      | 0.000613 | 0          | 0           |
| Firmicutes      | Ezakiella                                | 0      | 0      | 1      | 0        | 0          | 0.000162941 |
| Acidobacteria   | Candidatus_Solibacter                    | 0.1585 | 0.4216 | 0.4199 | 0.000504 | 0.0013401  | 0.001334564 |
| Proteobacteria  | uncultured_bacterium_f_JG34-KF-361       | 0      | 0.4753 | 0.5247 | 0        | 0.0001195  | 0.000131905 |
| Proteobacteria  | Nordella                                 | 0      | 0.5487 | 0.4513 | 0        | 0.0017925  | 0.001474228 |
| Proteobacteria  | Pseudoxanthomonas                        | 0      | 0.6631 | 0.3369 | 0        | 0.00029021 | 0.000147423 |
| Proteobacteria  | uncultured_bacterium_f_Bradyrhizobiaceae | 0.259  | 0.4116 | 0.3294 | 0.000854 | 0.00135718 | 0.001086273 |
| Actinobacteria  | Arthrobacter                             | 1      | 0      | 0      | 0.00046  | 0          | 0           |
| Chloroflexi     | uncultured_bacterium_f_AKIW781           | 0      | 0.6318 | 0.3682 | 0        | 0.00033289 | 0.000193977 |
| Proteobacteria  | uncultured_bacterium_f_Acetobacteraceae  | 0.2298 | 0.2926 | 0.4776 | 0.000328 | 0.00041825 | 0.0006828   |
| Acidobacteria   | RB41                                     | 0      | 0.6317 | 0.3683 | 0        | 0.00733217 | 0.004275262 |
| Proteobacteria  | Azohydromonas                            | 0.0288 | 0.5043 | 0.4669 | 0.000131 | 0.00230464 | 0.002133751 |
| Acidobacteria   | uncultured_bacterium_c_Subgroup_15       | 0      | 0.8603 | 0.1397 | 0        | 0.000239   | 3.88E-05    |
| Firmicutes      | [Eubacterium]_coprostanoligenes_group    | 0.6481 | 0.0606 | 0.2912 | 0.013227 | 0.00123768 | 0.005943467 |
| Proteobacteria  | uncultured_bacterium_f_Salinisphaeraceae | 1      | 0      | 0      | 0.000679 | 0          | 0           |
| Proteobacteria  | uncultured_bacterium_f_DUNssu044         | 0      | 0.4037 | 0.5963 | 0        | 6.83E-05   | 0.000100868 |
| Proteobacteria  | Sandaracinus                             | 0      | 0.4979 | 0.5021 | 0        | 0.00054628 | 0.000550896 |
| Actinobacteria  | uncultured_bacterium_f_Acidimicrobiaceae | 0.0293 | 0.6483 | 0.3224 | 6.57E-05 | 0.00145107 | 0.000721596 |
| Bacteroidetes   | Sporocytophaga                           | 0      | 0.3894 | 0.6106 | 0        | 0.00034143 | 0.000535378 |
| Armatimonadetes | uncultured_bacterium_f_Fimbriimonadaceae | 0      | 0.6312 | 0.3688 | 0        | 0.0005975  | 0.000349159 |
| Tenericutes     | Anaeroplasma                             | 0.4493 | 0.0137 | 0.5369 | 0.001117 | 3.41E-05   | 0.001334564 |
| Proteobacteria  | Brevundimonas                            | 0.0483 | 0.6778 | 0.2739 | 2.19E-05 | 0.00030729 | 0.000124146 |
| Proteobacteria  | Thiobacillus                             | 0      | 1      | 0      | 0        | 0.00165593 | 0           |
| Proteobacteria  | Chelatococcus                            | 0.9698 | 0.0302 | 0      | 0.000547 | 1.71E-05   | 0           |
| Bacteroidetes   | Alistipes                                | 0.5776 | 0.0701 | 0.3523 | 0.001336 | 0.00016218 | 0.000814705 |
| Firmicutes      | Christensenellaceae_R-7_group            | 0.6066 | 0.1478 | 0.2456 | 0.001226 | 0.00029875 | 0.000496582 |
| Actinobacteria  | Luedemannella                            | 0      | 0.4988 | 0.5012 | 0        | 0.00032436 | 0.000325882 |
| Proteobacteria  | Bradyrhizobium                           | 0.2628 | 0.3677 | 0.3695 | 0.003526 | 0.00493363 | 0.004958062 |



|                  |                                           |        |        |        |          |            |             |
|------------------|-------------------------------------------|--------|--------|--------|----------|------------|-------------|
| Actinobacteria   | Actinoplanes                              | 0      | 0.8544 | 0.1456 | 0        | 0.00027314 | 4.66E-05    |
| Firmicutes       | Tyzzarella                                | 0.7133 | 0.0649 | 0.2218 | 0.001971 | 0.00017925 | 0.000612969 |
| Fibrobacteres    | possible_genus_04                         | 0.5455 | 0.1613 | 0.2932 | 0.000635 | 0.00018779 | 0.0003414   |
| Proteobacteria   | Rhodoplanes                               | 0.0367 | 0.7432 | 0.2201 | 0.000394 | 0.00798942 | 0.002366524 |
| Proteobacteria   | uncultured_bacterium_f_Nannocystaceae     | 0      | 0.8102 | 0.1898 | 0        | 0.00082796 | 0.000193977 |
| Proteobacteria   | Hyphomicrobium                            | 0      | 0.7088 | 0.2912 | 0        | 0.00062311 | 0.00025605  |
| Gemmatimonadetes | Gemmatimonas                              | 0      | 0.5173 | 0.4827 | 0        | 0.00386667 | 0.003607979 |
| Synergistetes    | Thermovirga                               | 1      | 0      | 0      | 0.000482 | 0          | 0           |
| Bacteroidetes    | Prevotella                                | 0      | 0.2683 | 0.7317 | 0        | 4.27E-05   | 0.000116386 |
| Proteobacteria   | uncultured_bacterium_f_SM2D12             | 0.877  | 0.0436 | 0.0793 | 0.002058 | 0.00010243 | 0.000186218 |
| Acidobacteria    | Blastocatella                             | 0      | 0.8024 | 0.1976 | 0        | 0.00040971 | 0.000100868 |
| Bacteroidetes    | Crocinitomix                              | 0      | 0.9346 | 0.0654 | 0        | 0.00022193 | 1.55E-05    |
| Bacteroidetes    | Parabacteroides                           | 0      | 0.2373 | 0.7627 | 0        | 0.000239   | 0.00076815  |
| Bacteroidetes    | Dyadobacter                               | 0      | 0.2683 | 0.7317 | 0        | 4.27E-05   | 0.000116386 |
| Actinobacteria   | Nonomurea                                 | 0      | 0.2421 | 0.7579 | 0        | 7.68E-05   | 0.000240532 |
| Microgenomates   | uncultured_Microgenomates_group_bacterium | 0      | 0.4591 | 0.5409 | 0        | 0.00023046 | 0.000271568 |
| Proteobacteria   | Psychrobacter                             | 0      | 0.2619 | 0.7381 | 0        | 8.54E-05   | 0.000240532 |
| Firmicutes       | Oscillibacter                             | 0.9083 | 0.019  | 0.0727 | 0.002037 | 4.27E-05   | 0.000162941 |
| Bacteroidetes    | Prevotellaceae_NK3B31_group               | 0.2343 | 0.2055 | 0.5603 | 8.76E-05 | 7.68E-05   | 0.000209496 |
| Firmicutes       | Ruminiclostridium_6                       | 0.5034 | 0.1861 | 0.3106 | 0.00127  | 0.00046946 | 0.000783669 |
| Elusimicrobia    | uncultured_bacterium_o_Lineage_IIc        | 0      | 0.0873 | 0.9127 | 0        | 1.71E-05   | 0.000178459 |
| Proteobacteria   | uncultured_bacterium_o_NB1-j              | 0      | 0.453  | 0.547  | 0        | 0.00278264 | 0.003359688 |
| Acidobacteria    | uncultured_bacterium_o_Subgroup_7         | 0.3714 | 0.4244 | 0.2042 | 0.000635 | 0.00072553 | 0.000349159 |
| Proteobacteria   | Enhygromyxa                               | 0      | 0.5585 | 0.4415 | 0        | 0.00039264 | 0.000310364 |
| FCPU426          | uncultured_bacterium_p_FCPU426            | 0      | 0.3438 | 0.6562 | 0        | 0.00017071 | 0.000325882 |
| Tenericutes      | Unclassified                              | 0.4604 | 0.0932 | 0.4464 | 0.002825 | 0.00057189 | 0.002738961 |
| Acidobacteria    | uncultured_bacterium_c_Subgroup_6         | 0.066  | 0.5016 | 0.4324 | 0.003613 | 0.02744228 | 0.023657482 |
| Proteobacteria   | Silanimonas                               | 0      | 1      | 0      | 0        | 0.00065725 | 0           |
| Bacteroidetes    | uncultured_bacterium_f_Saprospiraceae     | 0      | 0.7263 | 0.2737 | 0        | 0.0038496  | 0.001450951 |

|                 |                                                 |        |        |        |          |            |             |
|-----------------|-------------------------------------------------|--------|--------|--------|----------|------------|-------------|
| Firmicutes      | Lachnoclostridium                               | 0.7466 | 0.0374 | 0.216  | 0.002387 | 0.0001195  | 0.00069056  |
| Proteobacteria  | Falsirhodobacter                                | 0.7498 | 0.0731 | 0.1771 | 0.000263 | 2.56E-05   | 6.21E-05    |
| Proteobacteria  | uncultured_bacterium_f_Polyangiaceae            | 0      | 0.6227 | 0.3773 | 0        | 0.00163885 | 0.000993164 |
| Bacteroidetes   | Cloacibacterium                                 | 0      | 0.3176 | 0.6824 | 0        | 9.39E-05   | 0.000201736 |
| Proteobacteria  | uncultured_bacterium_f_Hyphomonadaceae          | 0      | 0.1315 | 0.8685 | 0        | 0.00086211 | 0.005695176 |
| Armatimonadetes | uncultured_bacterium_o_Chthonomonadales         | 0      | 0.4872 | 0.5128 | 0        | 0.00016218 | 0.0001707   |
| Bacteroidetes   | uncultured_bacterium_f_Chitinophagaceae         | 0      | 0.4877 | 0.5123 | 0        | 0.01497162 | 0.015727687 |
| Acidobacteria   | Bryobacter                                      | 0      | 0.6636 | 0.3364 | 0        | 0.00740899 | 0.003755402 |
| Firmicutes      | Lachnospiraceae_NK4A136_group                   | 0.6422 | 0.049  | 0.3088 | 0.02249  | 0.00171568 | 0.010816179 |
| Microgenomates  | uncultured_bacterium_c_Candidatus_Woesebacteria | 0      | 1      | 0      | 0        | 0.00016218 | 0           |
| Firmicutes      | Ruminiclostridium_1                             | 0      | 0      | 1      | 0        | 0          | 0.000186218 |
| Proteobacteria  | Sulfurifustis                                   | 0.2052 | 0.2523 | 0.5425 | 0.000285 | 0.00034996 | 0.000752632 |
| Firmicutes      | uncultured_bacterium_f_Erysipelotrichaceae      | 0.7508 | 0.0665 | 0.1827 | 0.057812 | 0.00512142 | 0.01406724  |
| Armatimonadetes | Unclassified                                    | 0      | 0.7675 | 0.2325 | 0        | 0.00040971 | 0.000124146 |
| Bacteroidetes   | Ohtaekwangia                                    | 0      | 0.2949 | 0.7051 | 0        | 0.002629   | 0.006284867 |
| Actinobacteria  | Brevibacterium                                  | 0.1991 | 0.2717 | 0.5292 | 0.000131 | 0.00017925 | 0.000349159 |
| Cyanobacteria   | Microcoleus                                     | 0      | 0      | 1      | 0        | 0          | 0.002358765 |
| Proteobacteria  | Rhodomicrobium                                  | 0      | 0.4766 | 0.5234 | 0        | 0.00040971 | 0.000450028 |
| Chloroflexi     | uncultured_bacterium_c_SBR2076                  | 0.5307 | 0.2307 | 0.2386 | 0.000569 | 0.00024754 | 0.00025605  |
| Proteobacteria  | uncultured_bacterium_f_BIrii41                  | 0.1983 | 0.4296 | 0.372  | 0.004248 | 0.00920149 | 0.007968591 |
| Proteobacteria  | H16                                             | 0      | 0.601  | 0.399  | 0        | 0.00455806 | 0.003026047 |
| Bacteroidetes   | Adhaeribacter                                   | 0      | 0.4905 | 0.5095 | 0        | 0.00053775 | 0.000558655 |
| Bacteroidetes   | Odoribacter                                     | 0.3727 | 0      | 0.6273 | 8.76E-05 | 0          | 0.000147423 |
| Proteobacteria  | Parasutterella                                  | 0.3348 | 0.0843 | 0.5809 | 0.001051 | 0.00026461 | 0.001823387 |
| Bacteroidetes   | Barnesiella                                     | 0.9412 | 0      | 0.0588 | 0.000372 | 0          | 2.33E-05    |
| Acidobacteria   | DS-100                                          | 0      | 0.7294 | 0.2706 | 0        | 0.00041825 | 0.000155182 |
| Proteobacteria  | uncultured_bacterium_f_Methylophilaceae         | 0.2248 | 0.6408 | 0.1344 | 0.00035  | 0.00099868 | 0.000209496 |
| Cloacimonetes   | Unclassified                                    | 0.9927 | 0      | 0.0073 | 0.001051 | 0          | 7.76E-06    |
| Actinobacteria  | Lawsonella                                      | 0      | 0.5874 | 0.4126 | 0        | 0.00037557 | 0.000263809 |

|                |                                                      |        |        |        |          |            |             |
|----------------|------------------------------------------------------|--------|--------|--------|----------|------------|-------------|
| Proteobacteria | Rubellimicrobium                                     | 0.0847 | 0.1651 | 0.7502 | 2.19E-05 | 4.27E-05   | 0.000193977 |
| Firmicutes     | Streptococcus                                        | 0.5566 | 0.2104 | 0.2331 | 0.000723 | 0.00027314 | 0.000302605 |
| Chloroflexi    | Anaerolinea                                          | 1      | 0      | 0      | 0.000482 | 0          | 0           |
| Proteobacteria | Cellvibrio                                           | 0      | 0.7376 | 0.2624 | 0        | 0.00019632 | 6.98E-05    |
| Planctomycetes | uncultured_bacterium_c_BD7-11                        | 0      | 0.2391 | 0.7609 | 0        | 3.41E-05   | 0.000108627 |
| BRC1           | uncultured_bacterium_p_BRC1                          | 0      | 0.4074 | 0.5926 | 0        | 8.54E-05   | 0.000124146 |
| Acidobacteria  | Aridibacter                                          | 0.0434 | 0.8797 | 0.0769 | 2.19E-05 | 0.00044386 | 3.88E-05    |
| Proteobacteria | Burkholderia-Paraburkholderia                        | 0.1103 | 0.3273 | 0.5624 | 0.000394 | 0.00116939 | 0.002009606 |
| Planctomycetes | uncultured_bacterium_f_Phycisphaeraceae              | 0      | 0.6814 | 0.3186 | 0        | 0.00029875 | 0.000139664 |
| Firmicutes     | uncultured_bacterium_f_Clostridiales_vadinBB60_group | 0.9537 | 0      | 0.0463 | 0.001599 | 0          | 7.76E-05    |
| Proteobacteria | Undibacterium                                        | 0      | 0.0305 | 0.9695 | 0        | 8.54E-06   | 0.000271568 |
| Actinobacteria | uncultured_bacterium_o_Gaiellales                    | 0.0245 | 0.5039 | 0.4717 | 0.000153 | 0.00315821 | 0.002956215 |
| Actinobacteria | Jatrophihabitans                                     | 0      | 0.7196 | 0.2804 | 0        | 0.000239   | 9.31E-05    |
| Proteobacteria | uncultured_bacterium_f_Xanthomonadaceae              | 0.3054 | 0.4532 | 0.2414 | 0.000569 | 0.00084503 | 0.000450028 |
| Cyanobacteria  | Pleurocapsa                                          | 1      | 0      | 0      | 0.00162  | 0          | 0           |
| Bacteroidetes  | Terrimonas                                           | 0.0083 | 0.4687 | 0.523  | 8.76E-05 | 0.00495071 | 0.005524476 |
| Proteobacteria | uncultured_bacterium_f_Caulobacteraceae              | 0      | 0.4066 | 0.5934 | 0        | 0.00032436 | 0.000473305 |
| Actinobacteria | Amycolatopsis                                        | 0.6396 | 0.2244 | 0.136  | 0.000438 | 0.00015364 | 9.31E-05    |
| Spirochaetae   | uncultured_Spirochaetales_bacterium                  | 0      | 0.9502 | 0.0498 | 0        | 0.00044386 | 2.33E-05    |
| Cyanobacteria  | Chroococcidiopsis                                    | 0      | 0      | 1      | 0        | 0          | 0.02402216  |
| Proteobacteria | Pseudolabrys                                         | 0      | 0.7735 | 0.2265 | 0        | 0.00076821 | 0.000225014 |
| Proteobacteria | Rhizobacter                                          | 0      | 0.8297 | 0.1703 | 0        | 0.00026461 | 5.43E-05    |
| Proteobacteria | Campylobacter                                        | 0      | 0.386  | 0.614  | 0        | 0.00010243 | 0.000162941 |
| WS6            | uncultured_bacterium_p_WS6                           | 0      | 0.882  | 0.118  | 0        | 0.00168153 | 0.000225014 |
| Bacteroidetes  | vadinBC27_wastewater-sludge_group                    | 0.693  | 0.075  | 0.2319 | 0.000394 | 4.27E-05   | 0.000131905 |
| Proteobacteria | Desulfomicrobium                                     | 1      | 0      | 0      | 0.000547 | 0          | 0           |
| Proteobacteria | Tahibacter                                           | 0.2501 | 0.4485 | 0.3013 | 0.000109 | 0.00019632 | 0.000131905 |
| Firmicutes     | Blautia                                              | 0.287  | 0.0124 | 0.7006 | 0.000197 | 8.54E-06   | 0.000481064 |
| Firmicutes     | [Eubacterium]_nodatum_group                          | 0.5445 | 0.1222 | 0.3333 | 0.000723 | 0.00016218 | 0.000442268 |

|                 |                                           |        |        |        |          |            |             |
|-----------------|-------------------------------------------|--------|--------|--------|----------|------------|-------------|
| Proteobacteria  | BD1-7_clade                               | 0      | 0.1642 | 0.8358 | 0        | 4.27E-05   | 0.000217255 |
| Actinobacteria  | uncultured_bacterium_f_Micromonosporaceae | 0.4427 | 0.174  | 0.3833 | 0.002715 | 0.00106696 | 0.002351006 |
| Actinobacteria  | Janibacter                                | 0      | 0.7202 | 0.2798 | 0        | 0.00099868 | 0.000387955 |
| Firmicutes      | Planomicrobium                            | 0      | 0      | 1      | 0        | 0          | 0.00042675  |
| Deferribacteres | Mucispirillum                             | 0.5349 | 0.1651 | 0.3001 | 0.000526 | 0.00016218 | 0.000294846 |
| Verrucomicrobia | Roseimicrobium                            | 0      | 0.2323 | 0.7677 | 0        | 0.00028168 | 0.000931091 |
| Firmicutes      | uncultured_bacterium_f_Lachnospiraceae    | 0.6879 | 0.0936 | 0.2185 | 0.009723 | 0.00132303 | 0.00308812  |
| Firmicutes      | [Eubacterium]_ventriosum_group            | 1      | 0      | 0      | 0.000569 | 0          | 0           |
| Proteobacteria  | uncultured_bacterium_o_Xanthomonadales    | 0.049  | 0.5808 | 0.3702 | 0.002869 | 0.03403184 | 0.021694431 |
| Chloroflexi     | uncultured_bacterium_f_Caldilineaceae     | 0      | 0.6549 | 0.3451 | 0        | 0.00058896 | 0.000310364 |
| Firmicutes      | Ruminococcus_2                            | 0.8015 | 0.0526 | 0.146  | 0.002343 | 0.00015364 | 0.00042675  |
| Parcubacteria   | uncultured_bacterium_p_Parcubacteria      | 0      | 0.6668 | 0.3332 | 0        | 0.00248389 | 0.001241455 |
| Actinobacteria  | Mycobacterium                             | 0      | 0.4231 | 0.5769 | 0        | 0.00017071 | 0.000232773 |
| Nitrospirae     | uncultured_bacterium_f_Nitrospiraceae     | 0      | 0      | 1      | 0        | 0          | 0.000162941 |
| Proteobacteria  | Rhizomicrobium                            | 0.0639 | 0.4818 | 0.4543 | 0.000394 | 0.00297042 | 0.002801034 |
| Actinobacteria  | Paenarthrobacter                          | 0      | 0.362  | 0.638  | 0        | 0.00055482 | 0.000977646 |
| Chlorobi        | uncultured_bacterium_f_SJA-28             | 0      | 0.6335 | 0.3665 | 0        | 9.39E-05   | 5.43E-05    |
| Proteobacteria  | uncultured_bacterium_f_RB446              | 0      | 0.731  | 0.269  | 0        | 0.0003585  | 0.000131905 |
| Proteobacteria  | Phenylobacterium                          | 0.1603 | 0.5944 | 0.2452 | 0.001796 | 0.00665785 | 0.00274672  |
| Acidobacteria   | uncultured_bacterium_f_Sva0725            | 0      | 0.5475 | 0.4525 | 0        | 0.00065725 | 0.000543137 |
| Firmicutes      | Fusicatenibacter                          | 0.73   | 0.239  | 0.031  | 0.000547 | 0.00017925 | 2.33E-05    |
| Proteobacteria  | Rhizobium                                 | 0.1984 | 0.5575 | 0.2441 | 0.001161 | 0.00326064 | 0.001427674 |
| Firmicutes      | Eisenbergiella                            | 0      | 0.018  | 0.982  | 0        | 8.54E-06   | 0.000465546 |
| Proteobacteria  | Altererythrobacter                        | 0.1814 | 0.4637 | 0.3549 | 0.003022 | 0.00772481 | 0.005912431 |
| Proteobacteria  | Sphingopyxis                              | 0      | 0.7601 | 0.2399 | 0        | 0.00472024 | 0.001489746 |
| Proteobacteria  | Ensifer                                   | 0      | 0.6217 | 0.3783 | 0        | 0.00100721 | 0.000612969 |
| Proteobacteria  | Caenimonas                                | 0.0292 | 0.6295 | 0.3413 | 0.000131 | 0.00283385 | 0.001536301 |
| Firmicutes      | [Ruminococcus]_torques_group              | 0      | 0.3311 | 0.6689 | 0        | 7.68E-05   | 0.000155182 |
| Acidobacteria   | Elev-16S-1166                             | 0      | 0.44   | 0.56   | 0        | 8.54E-05   | 0.000108627 |

|                          |                                                |        |        |        |          |            |             |
|--------------------------|------------------------------------------------|--------|--------|--------|----------|------------|-------------|
| Actinobacteria           | Rhizocola                                      | 0      | 0.5702 | 0.4298 | 0        | 0.00139985 | 0.001055237 |
| Proteobacteria           | Woodsholea                                     | 0.05   | 0.6793 | 0.2707 | 0.000591 | 0.00804063 | 0.003204506 |
| Actinobacteria           | Iamia                                          | 0      | 0.6541 | 0.3459 | 0        | 0.00224489 | 0.001187142 |
| SR1_[Absconditabacteria] | Unclassified                                   | 0      | 0      | 1      | 0        | 0          | 0.000612969 |
| Cyanobacteria            | uncultured_bacterium_o_Obscuribacterales       | 0      | 0.3138 | 0.6862 | 0        | 0.00031582 | 0.00069056  |
| Bacteroidetes            | Mucilaginibacter                               | 0      | 0      | 1      | 0        | 0          | 0.000271568 |
| Proteobacteria           | Helicobacter                                   | 0.0502 | 0.505  | 0.4448 | 0.000109 | 0.00110111 | 0.000969887 |
| Microgenomates           | Unclassified                                   | 0      | 0.585  | 0.415  | 0        | 0.00069993 | 0.000496582 |
| Proteobacteria           | uncultured_bacterium_f_Sneathiellaceae         | 0      | 0.3834 | 0.6166 | 0        | 0.00011096 | 0.000178459 |
| Proteobacteria           | Reyranella                                     | 0.0855 | 0.5218 | 0.3927 | 0.000723 | 0.00441296 | 0.003320893 |
| Firmicutes               | Exiguobacterium                                | 1      | 0      | 0      | 0.000438 | 0          | 0           |
| Firmicutes               | Lachnospiraceae_UCG-001                        | 1      | 0      | 0      | 0.001073 | 0          | 0           |
| Proteobacteria           | Variibacter                                    | 0.1248 | 0.5366 | 0.3386 | 0.001226 | 0.00527506 | 0.003328652 |
| Proteobacteria           | Polaromonas                                    | 0.2954 | 0.5286 | 0.176  | 0.000482 | 0.00086211 | 0.000287087 |
| Proteobacteria           | OM27_clade                                     | 0      | 0.5454 | 0.4546 | 0        | 0.00195468 | 0.00162941  |
| Firmicutes               | Erysipelotrichaceae_UCG-007                    | 0      | 0      | 1      | 0        | 0          | 0.000178459 |
| Proteobacteria           | Unclassified                                   | 0.3883 | 0.3063 | 0.3054 | 0.036527 | 0.02881653 | 0.028731931 |
| Latescibacteria          | Unclassified                                   | 0      | 0.4317 | 0.5683 | 0        | 0.00074261 | 0.000977646 |
| Proteobacteria           | Pedomicrobium                                  | 0      | 0.4127 | 0.5873 | 0        | 0.00255217 | 0.003631257 |
| Proteobacteria           | Craurococcus                                   | 0      | 0.2202 | 0.7798 | 0        | 0.00016218 | 0.000574173 |
| Proteobacteria           | Vibrio                                         | 0      | 0.6535 | 0.3465 | 0        | 0.00051214 | 0.000271568 |
| TM6_[Dependentiae]       | Unclassified                                   | 0      | 0.6875 | 0.3125 | 0        | 0.00017071 | 7.76E-05    |
| Proteobacteria           | Acidovorax                                     | 0      | 0.3823 | 0.6177 | 0        | 0.00015364 | 0.000248291 |
| Microgenomates           | uncultured_bacterium_c_Candidatus_Pacebacteria | 0      | 1      | 0      | 0        | 0.00029875 | 0           |
| Firmicutes               | Ruminococcaceae_UCG-013                        | 0.4474 | 0.1885 | 0.3641 | 0.00081  | 0.00034143 | 0.000659523 |
| Proteobacteria           | uncultured_bacterium_o_Myxococcales            | 0.0319 | 0.4893 | 0.4787 | 6.57E-05 | 0.00100721 | 0.000985405 |
| Firmicutes               | Holdemanella                                   | 1      | 0      | 0      | 0.000745 | 0          | 0           |
| Verrucomicrobia          | Opitutus                                       | 0.1025 | 0.5536 | 0.3439 | 0.000788 | 0.00425931 | 0.002645852 |
| Proteobacteria           | Pseudohongiella                                | 0.206  | 0.5782 | 0.2158 | 0.000985 | 0.00276557 | 0.00103196  |

|                |                                  |        |        |        |          |            |             |
|----------------|----------------------------------|--------|--------|--------|----------|------------|-------------|
| Proteobacteria | Stenotrophomonas                 | 0.596  | 0.2262 | 0.1778 | 0.000832 | 0.00031582 | 0.000248291 |
| Firmicutes     | Ruminiclostridium                | 0.9427 | 0      | 0.0573 | 0.000766 | 0          | 4.66E-05    |
| Proteobacteria | Zoogloea                         | 1      | 0      | 0      | 0.000613 | 0          | 0           |
| Firmicutes     | Faecalibacterium                 | 0.6028 | 0.141  | 0.2563 | 0.000657 | 0.00015364 | 0.000279327 |
| Actinobacteria | Propionibacterium                | 0.2594 | 0.3713 | 0.3693 | 0.001139 | 0.00163032 | 0.001621651 |
| Firmicutes     | Lachnospiraceae_UCG-006          | 0.3789 | 0.0394 | 0.5817 | 0.000328 | 3.41E-05   | 0.000504341 |
| Proteobacteria | Mesorhizobium                    | 0.2146 | 0.3491 | 0.4363 | 0.000504 | 0.00081943 | 0.001024201 |
| Firmicutes     | Gracilibacter                    | 1      | 0      | 0      | 0.000569 | 0          | 0           |
| Firmicutes     | [Eubacterium]_xylanophilum_group | 0.2776 | 0.2124 | 0.51   | 0.000591 | 0.00045239 | 0.001086273 |
| Proteobacteria | Haliangium                       | 0.0964 | 0.5299 | 0.3737 | 0.003088 | 0.01697751 | 0.011972285 |

**Supplemental Table S5** Ternary diagram, F1, F2 and F3 groups in the bacterial phylum level.

| Phylum           | Genus                                       | J1_ratio | J2_ratio | J3_ratio | J1_reabundance | J2_reabundance | J3_reabundance |
|------------------|---------------------------------------------|----------|----------|----------|----------------|----------------|----------------|
| Verrucomicrobia  | uncultured_bacterium_c_OPB35_soil_group     | 0.3931   | 0.432    | 0.1749   | 0.0088         | 0.00967        | 0.00391605     |
| Saccharibacteria | uncultured_bacterium_p_Saccharibacteria     | 0.2852   | 0.2786   | 0.4362   | 0.009468       | 0.009247       | 0.014477146    |
| Actinobacteria   | Aeromicrobium                               | 0.5903   | 0.376    | 0.0337   | 0.000644       | 0.00041        | 3.67E-05       |
| Proteobacteria   | Dokdonella                                  | 0.3935   | 0.0513   | 0.5553   | 9.54E-05       | 1.24E-05       | 0.000134614    |
| Proteobacteria   | Vulgatibacter                               | 0.2249   | 0.7484   | 0.0266   | 0.00031        | 0.001032       | 3.67E-05       |
| Bacteroidetes    | Bacteroides                                 | 0.2965   | 0.0509   | 0.6525   | 0.005211       | 0.000895       | 0.011466683    |
| Actinobacteria   | Brachybacterium                             | 0        | 0.3006   | 0.6994   | 0              | 0.000137       | 0.000318179    |
| Proteobacteria   | Steroidobacter                              | 0.4808   | 0.2294   | 0.2898   | 0.004507       | 0.00215        | 0.002716759    |
| Firmicutes       | Family_XIII_AD3011_group                    | 1        | 0        | 0        | 0.00025        | 0              | 0              |
| Proteobacteria   | uncultured_bacterium_f_P3OB-42              | 0.1233   | 0.4497   | 0.427    | 0.000191       | 0.000696       | 0.000660833    |
| Chloroflexi      | uncultured_bacterium_c_Gitt-GS-136          | 0.4478   | 0.3334   | 0.2188   | 0.000751       | 0.000559       | 0.00036713     |
| Latescibacteria  | uncultured_bacterium_p_Latescibacteria      | 0.3769   | 0.395    | 0.2281   | 0.006773       | 0.007097       | 0.004099615    |
| Actinobacteria   | uncultured_bacterium_f_Propionibacteriaceae | 0        | 0.0274   | 0.9726   | 0              | 1.24E-05       | 0.000440556    |
| Proteobacteria   | Caulobacter                                 | 0.4489   | 0.3207   | 0.2304   | 0.001479       | 0.001056       | 0.000758735    |
| Bacteroidetes    | Flavitalea                                  | 0.4386   | 0.2613   | 0.3001   | 0.000501       | 0.000298       | 0.000342654    |
| Proteobacteria   | uncultured_bacterium_f_Blfdi19              | 0.9505   | 0.0495   | 0        | 0.000238       | 1.24E-05       | 0              |
| Bacteroidetes    | Flavobacterium                              | 0.1395   | 0.6937   | 0.1668   | 0.001514       | 0.007532       | 0.001811173    |
| Bacteroidetes    | Nibribacter                                 | 0.3791   | 0.6209   | 0        | 8.35E-05       | 0.000137       | 0              |
| Firmicutes       | Clostridium_sensu_stricto_1                 | 0.7128   | 0.05     | 0.2372   | 0.010994       | 0.000771       | 0.003659059    |
| Firmicutes       | Acetitomaculum                              | 1        | 0        | 0        | 0.000191       | 0              | 0              |
| Firmicutes       | Anaerococcus                                | 0        | 0        | 1        | 0              | 0              | 0.000697546    |
| Firmicutes       | Ruminococcaceae_UCG-005                     | 0.1348   | 0.0319   | 0.8333   | 0.000525       | 0.000124       | 0.003242979    |
| Firmicutes       | uncultured_bacterium_f_Peptococcaceae       | 0.9029   | 0        | 0.0971   | 0.001252       | 0              | 0.000134614    |
| Chloroflexi      | uncultured_bacterium_f_Anaerolineaceae      | 0.339    | 0.353    | 0.3081   | 0.033435       | 0.034814       | 0.030386098    |
| Proteobacteria   | uncultured_bacterium_f_KF-JG30-B3           | 0.4882   | 0.3662   | 0.1456   | 0.003529       | 0.002647       | 0.001052438    |
| Chloroflexi      | uncultured_bacterium_o_C0119                | 0.1815   | 0.2129   | 0.6056   | 0.000191       | 0.000224       | 0.000636358    |
| Proteobacteria   | Georgfuchsia                                | 0.1014   | 0.8986   | 0        | 4.77E-05       | 0.000423       | 0              |

|                     |                                          |        |        |        |          |          |             |
|---------------------|------------------------------------------|--------|--------|--------|----------|----------|-------------|
| Bacteroidetes       | Parafilimonas                            | 1      | 0      | 0      | 0.000405 | 0        | 0           |
| Actinobacteria      | Rubrobacter                              | 0.1422 | 0.566  | 0.2918 | 0.000596 | 0.002374 | 0.001223766 |
| Proteobacteria      | Meganema                                 | 0      | 1      | 0      | 0        | 0.005295 | 0           |
| Bacteroidetes       | uncultured_bacterium_f_KD3-93            | 0.3802 | 0.1821 | 0.4377 | 0.000882 | 0.000423 | 0.001015725 |
| Chlamydiae          | uncultured_bacterium_f_Simkaniaceae      | 0.0498 | 0.8992 | 0.0511 | 3.58E-05 | 0.000646 | 3.67E-05    |
| Proteobacteria      | uncultured_bacterium_f_Unknown_Family    | 0.5854 | 0.1366 | 0.278  | 0.001598 | 0.000373 | 0.000758735 |
| Actinobacteria      | Alpinimonas                              | 0.1619 | 0.4781 | 0.36   | 7.15E-05 | 0.000211 | 0.00015909  |
| Actinobacteria      | uncultured_bacterium_f_288-2             | 0.1584 | 0.3538 | 0.4877 | 8.35E-05 | 0.000186 | 0.000256991 |
| Firmicutes          | Aerococcus                               | 0.1378 | 0.0522 | 0.81   | 0.000131 | 4.97E-05 | 0.000770972 |
| Nitrospirae         | uncultured_bacterium_f_0319-6A21         | 0.1549 | 0.3951 | 0.4499 | 0.00056  | 0.001429 | 0.001627608 |
| Proteobacteria      | Sphingomonas                             | 0.4379 | 0.3036 | 0.2586 | 0.02578  | 0.017873 | 0.015223643 |
| Proteobacteria      | Panacagrimonas                           | 0.3251 | 0.4953 | 0.1797 | 0.000155 | 0.000236 | 8.57E-05    |
| Proteobacteria      | uncultured_bacterium_f_A0839             | 0.2031 | 0.3724 | 0.4245 | 0.000644 | 0.001181 | 0.001346142 |
| Chloroflexi         | Roseiflexus                              | 0.2378 | 0.4492 | 0.3129 | 0.001395 | 0.002635 | 0.001835648 |
| Bacteroidetes       | Dinghuibacter                            | 0.236  | 0.764  | 0      | 0.000227 | 0.000733 | 0           |
| Proteobacteria      | Ferrovibrio                              | 0.406  | 0.0651 | 0.5289 | 0.00031  | 4.97E-05 | 0.000403843 |
| Deinococcus-Thermus | Truepera                                 | 0      | 1      | 0      | 0        | 1.24E-05 | 0           |
| Nitrospirae         | Nitrospira                               | 0.3223 | 0.4213 | 0.2565 | 0.00446  | 0.005829 | 0.00354892  |
| Gemmatimonadetes    | uncultured_bacterium_f_Longimicrobiaceae | 0.0211 | 0.0894 | 0.8895 | 0.000167 | 0.000708 | 0.007048889 |
| Chloroflexi         | uncultured_bacterium_c_JG37-AG-4         | 0.1631 | 0      | 0.8369 | 4.77E-05 | 0        | 0.000244753 |
| Proteobacteria      | Klebsiella                               | 0.091  | 0.0294 | 0.8795 | 0.000346 | 0.000112 | 0.00334088  |
| Chloroflexi         | uncultured_bacterium_c_TK10              | 0.2714 | 0.4634 | 0.2653 | 0.001252 | 0.002138 | 0.001223766 |
| Proteobacteria      | Nannocystis                              | 0.234  | 0.7248 | 0.0412 | 0.000417 | 0.001293 | 7.34E-05    |
| Tectomicrobia       | uncultured_bacterium_p_Tectomicrobia     | 0.0484 | 0.5545 | 0.3971 | 1.19E-05 | 0.000137 | 9.79E-05    |
| Planctomycetes      | uncultured_bacterium_c_Pla3_lineage      | 0.2071 | 0.4102 | 0.3826 | 0.000119 | 0.000236 | 0.000220278 |
| Gemmatimonadetes    | Gemmatirosa                              | 0.0155 | 0.2902 | 0.6944 | 4.77E-05 | 0.000895 | 0.00214159  |
| Actinobacteria      | Pseudonocardia                           | 0.2352 | 0.5125 | 0.2523 | 0.000262 | 0.000572 | 0.000281466 |
| Firmicutes          | Enterococcus                             | 0.1722 | 0.0382 | 0.7896 | 0.00056  | 0.000124 | 0.002569908 |
| Firmicutes          | Ruminococcaceae_UCG-009                  | 0.7443 | 0.0665 | 0.1892 | 0.001252 | 0.000112 | 0.000318179 |



|                  |                                                           |        |        |        |          |          |             |
|------------------|-----------------------------------------------------------|--------|--------|--------|----------|----------|-------------|
| Actinobacteria   | Nocardioidea                                              | 0.1737 | 0.2949 | 0.5314 | 0.001252 | 0.002125 | 0.003830386 |
| Bacteroidetes    | Hymenobacter                                              | 0.5105 | 0.1901 | 0.2994 | 0.000167 | 6.21E-05 | 9.79E-05    |
| Cyanobacteria    | uncultured_bacterium_o_Gastranaerophilales                | 0.8467 | 0      | 0.1533 | 0.000405 | 0        | 7.34E-05    |
| Acidobacteria    | uncultured_Acidobacteria_bacterium                        | 0.2502 | 0.3957 | 0.3541 | 0.00595  | 0.009409 | 0.008419507 |
| Elusimicrobia    | uncultured_bacterium_o_Lineage_IIb                        | 0.2613 | 0.4705 | 0.2682 | 0.000131 | 0.000236 | 0.000134614 |
| Parcubacteria    | uncultured_bacterium_c_Candidatus_Magasanikbacteria       | 0.7933 | 0.2067 | 0      | 0.000429 | 0.000112 | 0           |
| Fibrobacteres    | uncultured_bacterium_f_Fibrobacteraceae                   | 0      | 0.0212 | 0.9788 | 0        | 1.24E-05 | 0.00057517  |
| Proteobacteria   | uncultured_bacterium_f_DA111                              | 0.2885 | 0.3351 | 0.3764 | 0.000835 | 0.000969 | 0.001089151 |
| Firmicutes       | Anaerostipes                                              | 0.093  | 0.0484 | 0.8586 | 2.38E-05 | 1.24E-05 | 0.000220278 |
| Bacteroidetes    | uncultured_bacterium_c_Bacteroidetes_VC2.1_Bac22          | 0.1461 | 0.2842 | 0.5697 | 0.000179 | 0.000348 | 0.000697546 |
| Proteobacteria   | uncultured_bacterium_o_Alphaproteobacteria_Incertae_Sedis | 0.1793 | 0.6663 | 0.1544 | 0.000739 | 0.002747 | 0.000636358 |
| Actinobacteria   | uncultured_bacterium_c_MB-A2-108                          | 0.1865 | 0.4771 | 0.3364 | 0.000393 | 0.001007 | 0.000709784 |
| Acidobacteria    | uncultured_bacterium_c_Subgroup_5                         | 0.0507 | 0.767  | 0.1823 | 2.38E-05 | 0.00036  | 8.57E-05    |
| Euryarchaeota    | uncultured_archaeon                                       | 0.2058 | 0.6434 | 0.1508 | 8.35E-05 | 0.000261 | 6.12E-05    |
| Elusimicrobia    | uncultured_bacterium_o_MVP-88                             | 0.1946 | 0.4154 | 0.39   | 0.000501 | 0.001069 | 0.001003488 |
| Proteobacteria   | Massilia                                                  | 0.1514 | 0.2298 | 0.6188 | 0.00068  | 0.001032 | 0.002777948 |
| Proteobacteria   | uncultured_bacterium_o_X35                                | 0.438  | 0      | 0.562  | 9.54E-05 | 0        | 0.000122377 |
| Proteobacteria   | Roseomonas                                                | 0.0035 | 0.9965 | 0      | 1.19E-05 | 0.003406 | 0           |
| Spirochaetae     | Treponema_2                                               | 0      | 0      | 1      | 0        | 0        | 0.000403843 |
| Gemmatimonadetes | uncultured_bacterium_c_S0134_terrestrial_group            | 0.4896 | 0.5104 | 0      | 0.000119 | 0.000124 | 0           |
| Firmicutes       | [Eubacterium]_ruminantium_group                           | 0.2588 | 0.5009 | 0.2403 | 0.00025  | 0.000485 | 0.000232515 |
| Firmicutes       | Lachnospiraceae_NC2004_group                              | 0.8163 | 0.0619 | 0.1219 | 0.000656 | 4.97E-05 | 9.79E-05    |
| Actinobacteria   | Microbacterium                                            | 0.1358 | 0.5257 | 0.3385 | 8.35E-05 | 0.000323 | 0.00020804  |
| Bacteroidetes    | uncultured_bacterium_f_AKYH767                            | 0.1513 | 0.6401 | 0.2086 | 0.000835 | 0.00353  | 0.00115034  |
| Proteobacteria   | Paucibacter                                               | 0.0834 | 0.2318 | 0.6848 | 3.58E-05 | 9.94E-05 | 0.000293704 |
| Bacteroidetes    | Prevotella_9                                              | 0.0271 | 0.0282 | 0.9447 | 1.19E-05 | 1.24E-05 | 0.00041608  |
| Proteobacteria   | uncultured_bacterium_f_I-10                               | 0.32   | 0.2716 | 0.4084 | 0.00186  | 0.001579 | 0.002374105 |
| Proteobacteria   | Arenimonas                                                | 0.4222 | 0.2979 | 0.28   | 0.00155  | 0.001094 | 0.001027963 |

|                  |                                                        |        |        |        |          |          |             |
|------------------|--------------------------------------------------------|--------|--------|--------|----------|----------|-------------|
| Acidobacteria    | PAUC26f                                                | 1      | 0      | 0      | 0.00025  | 0        | 0           |
| Firmicutes       | Anaerotruncus                                          | 0.152  | 0.0679 | 0.7801 | 8.35E-05 | 3.73E-05 | 0.000428318 |
| Chloroflexi      | uncultured_bacterium_o_JG30-KF-CM45                    | 0      | 0      | 1      | 0        | 0        | 0.000318179 |
| Firmicutes       | Veillonella                                            | 0.3276 | 0      | 0.6724 | 4.77E-05 | 0        | 9.79E-05    |
| Firmicutes       | Clostridium_sensu_stricto_3                            | 0      | 0      | 1      | 0        | 0        | 0.000281466 |
| Proteobacteria   | uncultured_bacterium_o_SC-I-84                         | 0.3288 | 0.3889 | 0.2823 | 0.00248  | 0.002933 | 0.002129352 |
| Firmicutes       | Lactobacillus                                          | 0.5941 | 0.0977 | 0.3082 | 0.089227 | 0.014666 | 0.04629505  |
| Proteobacteria   | Desulfovibrio                                          | 0.2576 | 0.1289 | 0.6135 | 0.000298 | 0.000149 | 0.000709784 |
| Proteobacteria   | Serratia                                               | 0.6009 | 0      | 0.3991 | 0.000203 | 0        | 0.000134614 |
| Cyanobacteria    | uncultured_bacterium_c_Chloroplast                     | 0.068  | 0.912  | 0.02   | 8.35E-05 | 0.001119 | 2.45E-05    |
| Firmicutes       | [Clostridium]_innocuum_group                           | 0      | 0.1193 | 0.8807 | 0        | 2.49E-05 | 0.000183565 |
| Chlamydiae       | Neochlamydia                                           | 0.2037 | 0.7963 | 0      | 4.77E-05 | 0.000186 | 0           |
| Bacteroidetes    | uncultured_bacterium_o_Sphingobacteriales              | 0.3543 | 0.1401 | 0.5057 | 0.001037 | 0.00041  | 0.001480756 |
| Actinobacteria   | uncultured_bacterium_f_Coriobacteriaceae               | 0.4365 | 0.2275 | 0.336  | 9.54E-05 | 4.97E-05 | 7.34E-05    |
| Planctomycetes   | uncultured_bacterium_c_OM190                           | 0.2338 | 0.4295 | 0.3367 | 0.002456 | 0.004512 | 0.003536682 |
| Acidobacteria    | uncultured_bacterium_f_Acidobacteriaceae_[Sub group_1] | 0.1774 | 0.2081 | 0.6145 | 9.54E-05 | 0.000112 | 0.000330417 |
| Elusimicrobia    | uncultured_bacterium_o_Lineage_Ila                     | 0.694  | 0.0517 | 0.2544 | 0.000167 | 1.24E-05 | 6.12E-05    |
| Proteobacteria   | uncultured_bacterium_f_TK34                            | 0.2023 | 0.7606 | 0.0371 | 0.000334 | 0.001255 | 6.12E-05    |
| Bacteroidetes    | uncultured_bacterium_c_Bacteroidetes_vadinHA 17        | 0      | 1      | 0      | 0        | 4.97E-05 | 0           |
| Nitrospirae      | Unclassified                                           | 0.2438 | 0.363  | 0.3932 | 8.35E-05 | 0.000124 | 0.000134614 |
| Actinobacteria   | Quadrisphaera                                          | 0      | 0.1322 | 0.8678 | 0        | 3.73E-05 | 0.000244753 |
| Proteobacteria   | uncultured_bacterium_f_Thiotrichaceae                  | 1      | 0      | 0      | 0.00031  | 0        | 0           |
| Firmicutes       | Roseburia                                              | 0.6803 | 0.084  | 0.2358 | 0.002719 | 0.000336 | 0.000942299 |
| Firmicutes       | Coprococcus_1                                          | 0.3615 | 0.1615 | 0.477  | 8.35E-05 | 3.73E-05 | 0.000110139 |
| Firmicutes       | Ruminococcus_1                                         | 0.6912 | 0.0497 | 0.2591 | 0.007607 | 0.000547 | 0.002851374 |
| Proteobacteria   | Comamonas                                              | 0      | 0.2889 | 0.7111 | 0        | 2.49E-05 | 6.12E-05    |
| Gemmatimonadetes | uncultured_bacterium_f_Gemmatimonadaceae               | 0.2579 | 0.3893 | 0.3529 | 0.009122 | 0.013772 | 0.012482408 |
| Proteobacteria   | uncultured_bacterium_o_Rhizobiales                     | 0.7439 | 0.1034 | 0.1527 | 0.000358 | 4.97E-05 | 7.34E-05    |

|                |                                                       |        |        |        |          |          |             |
|----------------|-------------------------------------------------------|--------|--------|--------|----------|----------|-------------|
| Proteobacteria | Inquilinus                                            | 0.4649 | 0.3231 | 0.2121 | 0.000215 | 0.000149 | 9.79E-05    |
| Firmicutes     | Marvinbryantia                                        | 0.2616 | 0      | 0.7384 | 9.54E-05 | 0        | 0.000269228 |
| Proteobacteria | Polyangium                                            | 0.374  | 0.1462 | 0.4798 | 9.54E-05 | 3.73E-05 | 0.000122377 |
| Proteobacteria | Escherichia-Shigella                                  | 0.2678 | 0.0756 | 0.6566 | 0.001717 | 0.000485 | 0.004209753 |
| Bacteroidetes  | uncultured_bacterium_f_Bacteroidales_S24-7_group      | 0.5481 | 0.0743 | 0.3776 | 0.040327 | 0.005469 | 0.027779477 |
| Proteobacteria | uncultured_bacterium_f_Xanthomonadales_Incertae_Sedis | 0.3324 | 0.3494 | 0.3181 | 0.014118 | 0.01484  | 0.013510371 |
| Chlorobi       | uncultured_bacterium_f_OPB56                          | 0.2998 | 0.2963 | 0.4039 | 0.001145 | 0.001131 | 0.001541945 |
| Spirochaetae   | uncultured_bacterium_f_Leptospiraceae                 | 0.0173 | 0.4505 | 0.5322 | 1.19E-05 | 0.000311 | 0.00036713  |
| Actinobacteria | uncultured_bacterium_f_Euzebyaceae                    | 0.2339 | 0.7661 | 0      | 8.35E-05 | 0.000273 | 0           |
| Acidobacteria  | uncultured_bacterium_f_ABS-19                         | 0.3478 | 0.3821 | 0.2701 | 0.000441 | 0.000485 | 0.000342654 |
| Proteobacteria | Hirschia                                              | 0.2331 | 0.3855 | 0.3814 | 0.004615 | 0.007632 | 0.007550633 |
| Bacteroidetes  | Unclassified                                          | 0.1797 | 0.4435 | 0.3768 | 0.002242 | 0.005531 | 0.00469926  |
| Actinobacteria | Micrococcus                                           | 0      | 0.1561 | 0.8439 | 0        | 0.000783 | 0.004234229 |
| Cyanobacteria  | Unclassified                                          | 0      | 0.0366 | 0.9634 | 0        | 8.70E-05 | 0.002288442 |
| Proteobacteria | Candidatus_Odyssella                                  | 0.1492 | 0.3608 | 0.49   | 0.000298 | 0.000721 | 0.000979012 |
| Proteobacteria | uncultured_organism                                   | 0.2446 | 0.153  | 0.6024 | 5.96E-05 | 3.73E-05 | 0.000146852 |
| Bacteroidetes  | Chryseolinea                                          | 0.3663 | 0.3577 | 0.276  | 0.000942 | 0.00092  | 0.000709784 |
| Acidobacteria  |                                                       | 0.3363 | 0.2254 | 0.4383 | 0.001502 | 0.001007 | 0.001958025 |
| Tenericutes    | uncultured_bacterium_o_Mollicutes_RF9                 | 0.5564 | 0.0964 | 0.3472 | 0.00502  | 0.00087  | 0.00313284  |
| Acidobacteria  | Paludibaculum                                         | 0.2976 | 0.5937 | 0.1087 | 0.00124  | 0.002473 | 0.000452793 |
| Bacteroidetes  | uncultured_bacterium_f_NS11-12_marine_group           | 0.483  | 0.3724 | 0.1446 | 0.001145 | 0.000882 | 0.000342654 |
| Proteobacteria | Bosea                                                 | 0.433  | 0.3406 | 0.2264 | 0.000632 | 0.000497 | 0.000330417 |
| Spirochaetae   | Brevinema                                             | 0      | 0      | 1      | 0        | 0        | 0.000477269 |
| Firmicutes     | Staphylococcus                                        | 0.0742 | 0.041  | 0.8848 | 0.000405 | 0.000224 | 0.004833874 |
| Chloroflexi    | uncultured_bacterium_c_Ardenticatenia                 | 0.3033 | 0.3667 | 0.33   | 0.000596 | 0.000721 | 0.000648596 |
| Bacteroidetes  | uncultured_bacterium_f_env.OPS_17                     | 0.2299 | 0.5115 | 0.2586 | 0.00062  | 0.00138  | 0.000697546 |
| Chloroflexi    | uncultured_Chloroflexi_bacterium                      | 0.5493 | 0.3196 | 0.1311 | 0.000513 | 0.000298 | 0.000122377 |
| Proteobacteria | uncultured_bacterium_f_KD3-10                         | 0.3073 | 0.1802 | 0.5125 | 0.000191 | 0.000112 | 0.000318179 |

|                 |                                                |        |        |        |          |          |             |
|-----------------|------------------------------------------------|--------|--------|--------|----------|----------|-------------|
| Firmicutes      | Trichococcus                                   | 0      | 0.1014 | 0.8986 | 0        | 1.24E-05 | 0.000110139 |
| Proteobacteria  | Azoarcus                                       | 0.0181 | 0.9819 | 0      | 1.19E-05 | 0.000646 | 0           |
| Bacteroidetes   | Ferruginibacter                                | 0.7543 | 0.2457 | 0      | 0.000191 | 6.21E-05 | 0           |
| Proteobacteria  | Candidatus_Alysiosphaera                       | 0.1723 | 0.4014 | 0.4264 | 0.000203 | 0.000472 | 0.000501744 |
| Armatimonadetes | uncultured_bacterium_o_Armatimonadales         | 0.0139 | 0      | 0.9861 | 1.19E-05 | 0        | 0.000844398 |
| Firmicutes      | Peptoniphilus                                  | 0      | 0      | 1      | 0        | 0        | 0.001040201 |
| Proteobacteria  | Pseudomonas                                    | 0.5702 | 0.2671 | 0.1628 | 0.008359 | 0.003915 | 0.002386343 |
| Chloroflexi     | uncultured_bacterium_c_KD4-96                  | 0.489  | 0.3524 | 0.1586 | 0.003208 | 0.002312 | 0.001040201 |
| Omnitrophica    | uncultured_bacterium_p_Omnitrophica            | 0.1581 | 0.6797 | 0.1622 | 9.54E-05 | 0.00041  | 9.79E-05    |
| Microgenomates  | uncultured_bacterium_c_Candidatus_Levybacteria | 0.6638 | 0.2838 | 0.0524 | 0.000465 | 0.000199 | 3.67E-05    |
| Proteobacteria  | uncultured_bacterium_f_Hyphomicrobiaceae       | 0.1859 | 0.226  | 0.5881 | 0.000859 | 0.001044 | 0.002716759 |
| Proteobacteria  | Rhodobacter                                    | 0      | 0.9936 | 0.0064 | 0        | 0.001889 | 1.22E-05    |
| Firmicutes      | uncultured_bacterium_f_Ruminococcaceae         | 0.5238 | 0.1079 | 0.3683 | 0.001932 | 0.000398 | 0.00135838  |
| Proteobacteria  | Rhodovarius                                    | 0      | 1      | 0      | 0        | 0.000423 | 0           |
| Acidobacteria   | uncultured_bacterium_c_Subgroup_11             | 0.4825 | 0.3053 | 0.2122 | 0.000334 | 0.000211 | 0.000146852 |
| Actinobacteria  | uncultured_bacterium_f_Sporichthyaceae         | 0.4724 | 0.5276 | 0      | 0.000167 | 0.000186 | 0           |
| Actinobacteria  | Rhodococcus                                    | 0.1132 | 0.0916 | 0.7952 | 0.00967  | 0.00783  | 0.0679557   |
| Proteobacteria  | Ralstonia                                      | 0.6189 | 0      | 0.3811 | 5.96E-05 | 0        | 3.67E-05    |
| Acidobacteria   | uncultured_bacterium_c_Subgroup_22             | 0.1152 | 0.6484 | 0.2364 | 5.96E-05 | 0.000336 | 0.000122377 |
| Proteobacteria  | Methylobacterium                               | 0      | 0.0427 | 0.9573 | 0        | 4.97E-05 | 0.001113627 |
| Bacteroidetes   | Niastella                                      | 0.4489 | 0.2477 | 0.3034 | 0.007297 | 0.004027 | 0.004931775 |
| Actinobacteria  | Blastococcus                                   | 0.1782 | 0.5984 | 0.2235 | 0.000107 | 0.00036  | 0.000134614 |
| Proteobacteria  | uncultured_bacterium_o_HTA4                    | 0.7271 | 0.2729 | 0      | 0.000298 | 0.000112 | 0           |
| Bacteroidetes   | Rikenellaceae_RC9_gut_group                    | 0      | 0.2623 | 0.7377 | 0        | 8.70E-05 | 0.000244753 |
| Acidobacteria   | Unclassified                                   | 0.3095 | 0.3791 | 0.3114 | 0.035998 | 0.044099 | 0.03622346  |
| Proteobacteria  | Phaselicystis                                  | 0.3214 | 0.4697 | 0.2089 | 0.002373 | 0.003468 | 0.001541945 |
| Proteobacteria  | uncultured_bacterium_f_Rhodospirillaceae       | 0.2381 | 0.4576 | 0.3043 | 0.005497 | 0.010565 | 0.007024414 |
| Chloroflexi     | uncultured_bacterium_o_Ardenticatenales        | 0.4027 | 0.4497 | 0.1476 | 0.000167 | 0.000186 | 6.12E-05    |
| Actinobacteria  | Solirubrobacter                                | 0.1214 | 0.4218 | 0.4568 | 0.000358 | 0.001243 | 0.001346142 |

|                 |                                                       |        |        |        |          |          |             |
|-----------------|-------------------------------------------------------|--------|--------|--------|----------|----------|-------------|
| Proteobacteria  | Pasteurella                                           | 0.9488 | 0      | 0.0512 | 0.000227 | 0        | 1.22E-05    |
| Bacteroidetes   | Alloprevotella                                        | 0.5453 | 0      | 0.4547 | 0.000191 | 0        | 0.00015909  |
| Proteobacteria  | uncultured_bacterium_f_Rhodobiaceae                   | 0.2503 | 0.7337 | 0.0161 | 0.000191 | 0.000559 | 1.22E-05    |
| Fusobacteria    | Cetobacterium                                         | 0      | 0.4037 | 0.5963 | 0        | 4.97E-05 | 7.34E-05    |
| Proteobacteria  | uncultured_bacterium_o_TRA3-20                        | 0.3851 | 0.3706 | 0.2443 | 0.010553 | 0.010155 | 0.006693997 |
| Actinobacteria  | Virgisporangium                                       | 0.4052 | 0.4969 | 0.0979 | 0.000203 | 0.000249 | 4.90E-05    |
| Proteobacteria  | uncultured_bacterium_f_Sandaracinaceae                | 0.3971 | 0.457  | 0.1459 | 0.008359 | 0.00962  | 0.003071651 |
| Acidobacteria   | uncultured_bacterium_c_Subgroup_18                    | 0      | 0.0943 | 0.9057 | 0        | 4.97E-05 | 0.000477269 |
| Verrucomicrobia | Terrimicrobium                                        | 0.5191 | 0.4809 | 0      | 0.000215 | 0.000199 | 0           |
| Acidobacteria   | uncultured_bacterium_f_Blastocatellaceae [Subgroup_4] | 0.548  | 0.2242 | 0.2278 | 0.002886 | 0.001181 | 0.00119929  |
| Firmicutes      | Ruminiclostridium_9                                   | 0.4837 | 0.0435 | 0.4729 | 0.002766 | 0.000249 | 0.002704522 |
| Proteobacteria  | uncultured_bacterium_f_Alcaligenaceae                 | 0.1602 | 0.3817 | 0.4581 | 0.000167 | 0.000398 | 0.000477269 |
| Proteobacteria  | uncultured_bacterium_f_Oligoflexaceae                 | 1      | 0      | 0      | 0.000215 | 0        | 0           |
| Actinobacteria  | Dietzia                                               | 0      | 0.152  | 0.848  | 0        | 3.73E-05 | 0.00020804  |
| Proteobacteria  | uncultured_bacterium_o_SAR324_clade[Marine_group_B]   | 0.9138 | 0.0577 | 0.0284 | 0.000393 | 2.49E-05 | 1.22E-05    |
| Cyanobacteria   | uncultured_bacterium_o_Vampirovibrionales             | 1      | 0      | 0      | 0.000107 | 0        | 0           |
| Actinobacteria  | Coriobacteriaceae_UCG-002                             | 0.4144 | 0.1306 | 0.455  | 0.000513 | 0.000162 | 0.000562932 |
| Elusimicrobia   | Unclassified                                          | 0.3314 | 0.1583 | 0.5102 | 0.000286 | 0.000137 | 0.000440556 |
| Proteobacteria  | Aquicella                                             | 0.4054 | 0.1397 | 0.4549 | 0.001407 | 0.000485 | 0.001578658 |
| Acidobacteria   | Stenotrophobacter                                     | 0.9169 | 0.0831 | 0      | 0.000549 | 4.97E-05 | 0           |
| Chlamydiae      | Unclassified                                          | 1      | 0      | 0      | 0.000227 | 0        | 0           |
| Proteobacteria  | uncultured_bacterium_o_Rickettsiales                  | 0      | 0      | 1      | 0        | 0        | 0.000660833 |
| Firmicutes      | Subdoligranulum                                       | 0.1142 | 0.4168 | 0.469  | 2.38E-05 | 8.70E-05 | 9.79E-05    |
| Proteobacteria  | Hydrogenophaga                                        | 0.0348 | 0      | 0.9652 | 1.19E-05 | 0        | 0.000330417 |
| Bacteroidetes   | uncultured_bacterium_f_NS9_marine_group               | 0.2366 | 0.1818 | 0.5816 | 0.000453 | 0.000348 | 0.001113627 |
| Firmicutes      | Ruminococcaceae_UCG-010                               | 0.8741 | 0      | 0.1259 | 0.001359 | 0        | 0.000195802 |
| Planctomycetes  | Unclassified                                          | 0.2071 | 0.5544 | 0.2385 | 0.001657 | 0.004437 | 0.001909074 |
| Proteobacteria  | uncultured_bacterium_f_Nitrosomonadaceae              | 0.3015 | 0.4773 | 0.2212 | 0.022405 | 0.03546  | 0.016435171 |

|                           |                                                  |        |        |        |          |          |             |
|---------------------------|--------------------------------------------------|--------|--------|--------|----------|----------|-------------|
| Chloroflexi               | uncultured_bacterium_c_JG30-KF-CM66              | 0.1184 | 0.4565 | 0.4252 | 0.000119 | 0.00046  | 0.000428318 |
| Proteobacteria            | Haliea                                           | 0.509  | 0.379  | 0.112  | 0.000167 | 0.000124 | 3.67E-05    |
| Planctomycetes            | SM1A02                                           | 0.127  | 0.4657 | 0.4073 | 0.000668 | 0.002449 | 0.00214159  |
| Actinobacteria            | Unclassified                                     | 0.2029 | 0.4326 | 0.3645 | 0.002385 | 0.005084 | 0.004283179 |
| Verrucomicrobia           | Chthoniobacter                                   | 0.2199 | 0.2937 | 0.4864 | 0.00161  | 0.00215  | 0.003561158 |
| Proteobacteria            | Devosia                                          | 0.3706 | 0.2756 | 0.3538 | 0.001705 | 0.001268 | 0.001627608 |
| Candidatus_Berkelbacteria | uncultured_bacterium_p_Candidatus_Berkelbacteria | 0.6771 | 0.219  | 0.1038 | 0.001037 | 0.000336 | 0.00015909  |
| Verrucomicrobia           | Akkermansia                                      | 0.0198 | 0.3096 | 0.6706 | 1.19E-05 | 0.000186 | 0.000403843 |
| Proteobacteria            | Lautropia                                        | 0.1777 | 0.7615 | 0.0608 | 0.000107 | 0.00046  | 3.67E-05    |
| Proteobacteria            | Polycyclovorans                                  | 0.4132 | 0.3616 | 0.2251 | 0.000966 | 0.000845 | 0.000526219 |
| Parcubacteria             | Unclassified                                     | 0.3814 | 0.2272 | 0.3914 | 8.35E-05 | 4.97E-05 | 8.57E-05    |
| Firmicutes                | Ruminococcaceae_NK4A214_group                    | 0.5553 | 0.0881 | 0.3565 | 0.002898 | 0.00046  | 0.001860124 |
| Bacteroidetes             | Sediminibacterium                                | 0.0304 | 0.2216 | 0.748  | 2.38E-05 | 0.000174 | 0.000587407 |
| Bacteroidetes             | Fluviicola                                       | 0.0942 | 0.4912 | 0.4145 | 8.35E-05 | 0.000435 | 0.00036713  |
| Chloroflexi               | uncultured_bacterium_c_S085                      | 0.3359 | 0.4644 | 0.1996 | 0.001133 | 0.001566 | 0.000673071 |
| Cyanobacteria             | Solanum_torvum                                   | 0      | 1      | 0      | 0        | 0.000112 | 0           |
| Actinobacteria            | Sporichthya                                      | 0.3362 | 0.4522 | 0.2115 | 0.00037  | 0.000497 | 0.000232515 |
| Cyanobacteria             | Nicotiana_otophora                               | 0.0198 | 0.6718 | 0.3084 | 0.000727 | 0.024635 | 0.011307593 |
| Actinobacteria            | Asaccharobacter                                  | 0.1702 | 0      | 0.8298 | 4.77E-05 | 0        | 0.000232515 |
| Bacteroidetes             | Flavisolibacter                                  | 0.258  | 0.7042 | 0.0378 | 0.000501 | 0.001367 | 7.34E-05    |
| Verrucomicrobia           | Unclassified                                     | 0.4022 | 0.0932 | 0.5046 | 0.000107 | 2.49E-05 | 0.000134614 |
| Proteobacteria            | Paracoccus                                       | 0      | 0.5957 | 0.4043 | 0        | 0.001641 | 0.001113627 |
| Proteobacteria            | uncultured_bacterium_f_Comamonadaceae            | 0.3215 | 0.4737 | 0.2048 | 0.000346 | 0.00051  | 0.000220278 |
| Bacteroidetes             | Solitalea                                        | 0.0902 | 0.823  | 0.0868 | 0.000191 | 0.00174  | 0.000183565 |
| Firmicutes                | Faecalibaculum                                   | 0.5201 | 0.0909 | 0.389  | 0.011733 | 0.002051 | 0.008774399 |
| Firmicutes                | Turicibacter                                     | 0.571  | 0.0815 | 0.3475 | 0.003398 | 0.000485 | 0.002068164 |
| Proteobacteria            | Sphingobium                                      | 0.4847 | 0.2746 | 0.2407 | 0.007393 | 0.004189 | 0.003671297 |
| Firmicutes                | Ruminiclostridium_5                              | 0.53   | 0.0552 | 0.4148 | 0.000954 | 9.94E-05 | 0.000746497 |
| Bacteroidetes             | uncultured_Bacteroidetes_bacterium               | 0.2741 | 0.1633 | 0.5626 | 8.35E-05 | 4.97E-05 | 0.000171327 |

|                  |                                                 |        |        |        |          |          |             |
|------------------|-------------------------------------------------|--------|--------|--------|----------|----------|-------------|
| Proteobacteria   | Agaricicola                                     | 0.9573 | 0      | 0.0427 | 0.000274 | 0        | 1.22E-05    |
| Firmicutes       | Bacillus                                        | 0.0226 | 0.1964 | 0.781  | 3.58E-05 | 0.000311 | 0.001236003 |
| Firmicutes       | Kurthia                                         | 0.1166 | 0.0456 | 0.8378 | 9.54E-05 | 3.73E-05 | 0.000685309 |
| Proteobacteria   | Variovorax                                      | 0.5359 | 0.3724 | 0.0917 | 0.000358 | 0.000249 | 6.12E-05    |
| Gemmatimonadetes | uncultured_bacterium_c_BD2-11_terrestrial_group | 0.1209 | 0.6841 | 0.195  | 8.35E-05 | 0.000472 | 0.000134614 |
| Proteobacteria   | Acidibacter                                     | 0.1723 | 0.426  | 0.4017 | 0.008323 | 0.020583 | 0.019408921 |
| Proteobacteria   | Desulfatiglans                                  | 1      | 0      | 0      | 0.000346 | 0        | 0           |
| Verrucomicrobia  | uncultured_bacterium_f_Verrucomicrobiaceae      | 0.366  | 0.2462 | 0.3878 | 0.00037  | 0.000249 | 0.000391605 |
| Proteobacteria   | Candidatus_Xenohalictis                         | 0      | 1      | 0      | 0        | 0.000286 | 0           |
| Firmicutes       | Ruminococcaceae_UCG-004                         | 0.9785 | 0.0154 | 0.0061 | 0.003947 | 6.21E-05 | 2.45E-05    |
| Actinobacteria   | uncultured_bacterium_o_Acidimicrobiales         | 0.368  | 0.3469 | 0.2851 | 0.01134  | 0.010689 | 0.008786636 |
| Bacteroidetes    | uncultured_bacterium_c_SM1A07                   | 0.2172 | 0.1698 | 0.613  | 9.54E-05 | 7.46E-05 | 0.000269228 |
| Actinobacteria   | Promicromonospora                               | 0.5332 | 0.1112 | 0.3557 | 0.000238 | 4.97E-05 | 0.00015909  |
| Proteobacteria   | Delftia                                         | 0      | 0      | 1      | 0        | 0        | 0.000354892 |
| Acidobacteria    | uncultured_bacterium_c_Subgroup_17              | 0.2727 | 0.3188 | 0.4085 | 0.000882 | 0.001032 | 0.001321667 |
| Actinobacteria   | Enterorhabdus                                   | 0.9056 | 0.0944 | 0      | 0.000119 | 1.24E-05 | 0           |
| Proteobacteria   | Aeromonas                                       | 0.1024 | 0.2882 | 0.6095 | 0.000119 | 0.000336 | 0.000709784 |
| Bacteroidetes    | Chryseobacterium                                | 0.0032 | 0.9693 | 0.0275 | 7.15E-05 | 0.021987 | 0.00062412  |
| Actinobacteria   | Ilumatobacter                                   | 0.3638 | 0.4029 | 0.2333 | 0.000763 | 0.000845 | 0.000489506 |
| Cyanobacteria    | Microcystis                                     | 0.0001 | 0.9999 | 0      | 1.19E-05 | 0.086296 | 0           |
| Bacteroidetes    | uncultured_bacterium_f_PHOS-HE51                | 0.3661 | 0.454  | 0.1799 | 0.002516 | 0.00312  | 0.001236003 |
| Spirochaetae     | Turneriella                                     | 0.104  | 0.2266 | 0.6694 | 0.000131 | 0.000286 | 0.000844398 |
| Actinobacteria   | Actinophytocola                                 | 0.2448 | 0.0911 | 0.664  | 0.000167 | 6.21E-05 | 0.000452793 |
| Proteobacteria   | Noviherbaspirillum                              | 0.4068 | 0.3612 | 0.232  | 0.000322 | 0.000286 | 0.000183565 |
| Planctomycetes   | uncultured_bacterium_f_Planctomycetaceae        | 0.0801 | 0.3444 | 0.5755 | 9.54E-05 | 0.00041  | 0.000685309 |
| Proteobacteria   | Alicyclophilus                                  | 0      | 0      | 1      | 0        | 0        | 0.000244753 |
| Firmicutes       | Dialister                                       | 0      | 0      | 1      | 0        | 0        | 0.000477269 |
| Proteobacteria   | Porphyrobacter                                  | 0.0496 | 0.8842 | 0.0662 | 0.000119 | 0.002125 | 0.00015909  |
| Proteobacteria   | uncultured_bacterium_f_Coxiellaceae             | 0      | 0      | 1      | 0        | 0        | 0.000599645 |

|                  |                                        |        |        |        |          |          |             |
|------------------|----------------------------------------|--------|--------|--------|----------|----------|-------------|
| GAL15            | uncultured_bacterium_p_GAL15           | 0.0509 | 0.5309 | 0.4182 | 1.19E-05 | 0.000124 | 9.79E-05    |
| Proteobacteria   | Raoultella                             | 0.9555 | 0.0179 | 0.0265 | 0.001324 | 2.49E-05 | 3.67E-05    |
| Proteobacteria   | Sorangium                              | 0.367  | 0.397  | 0.236  | 0.001884 | 0.002038 | 0.001211528 |
| Saccharibacteria | Candidatus_Saccharimonas               | 0.726  | 0.0711 | 0.2029 | 0.00254  | 0.000249 | 0.000709784 |
| Proteobacteria   | uncultured_bacterium_f_MNC12           | 0.3609 | 0.2687 | 0.3704 | 8.35E-05 | 6.21E-05 | 8.57E-05    |
| Armatimonadetes  | uncultured_bacterium_p_Armatimonadetes | 0.2404 | 0.3827 | 0.3768 | 0.000656 | 0.001044 | 0.001027963 |
| Actinobacteria   | Corynebacterium_1                      | 0.1989 | 0.084  | 0.7171 | 0.000441 | 0.000186 | 0.001590895 |
| Firmicutes       | Finegoldia                             | 0      | 0.0132 | 0.9868 | 0        | 1.24E-05 | 0.000930062 |
| Proteobacteria   | Enhydrobacter                          | 0.0504 | 0.8116 | 0.138  | 0.000107 | 0.001728 | 0.000293704 |
| Proteobacteria   | uncultured_bacterium_f_Moraxellaceae   | 0.0194 | 0.424  | 0.5566 | 1.19E-05 | 0.000261 | 0.000342654 |
| Proteobacteria   | Skermanella                            | 0.2881 | 0.1501 | 0.5618 | 0.000119 | 6.21E-05 | 0.000232515 |
| Actinobacteria   | CL500-29_marine_group                  | 0.4096 | 0.3853 | 0.2051 | 0.000489 | 0.00046  | 0.000244753 |
| Firmicutes       | Ruminococcaceae_UCG-014                | 0.84   | 0.0247 | 0.1353 | 0.049782 | 0.001467 | 0.008015664 |
| Firmicutes       | Unclassified                           | 0.6569 | 0.0602 | 0.2829 | 0.016538 | 0.001516 | 0.007122315 |
| Proteobacteria   | Dongia                                 | 0.2928 | 0.5823 | 0.1248 | 0.002325 | 0.004624 | 0.00099125  |
| Verrucomicrobia  | Candidatus_Methylococcoides            | 1      | 0      | 0      | 0.000215 | 0        | 0           |
| Acidobacteria    | uncultured_bacterium_c_AT-s3-28        | 0      | 0.2131 | 0.7869 | 0        | 4.97E-05 | 0.000183565 |
| Actinobacteria   | Glutamicibacter                        | 0.3882 | 0.4079 | 0.2039 | 0.001514 | 0.001591 | 0.000795448 |
| Bacteroidetes    | uncultured_bacterium_f_Cytophagaceae   | 0.3475 | 0.4917 | 0.1608 | 0.033673 | 0.047641 | 0.015578535 |
| Firmicutes       | uncultured_bacterium_f_Eubacteriaceae  | 0      | 0.0564 | 0.9436 | 0        | 1.24E-05 | 0.00020804  |
| Bacteroidetes    | Chitinophaga                           | 0.6055 | 0.3945 | 0      | 0.000286 | 0.000186 | 0           |
| Proteobacteria   | Lysobacter                             | 0.2742 | 0.5206 | 0.2052 | 0.004269 | 0.008104 | 0.003194028 |
| Firmicutes       | Anaerovorax                            | 0.7955 | 0.0276 | 0.1769 | 0.000715 | 2.49E-05 | 0.00015909  |
| Proteobacteria   | Amaricoccus                            | 0      | 0      | 1      | 0        | 0        | 0.00062412  |
| Planctomycetes   | CL500-3                                | 0.003  | 0.001  | 0.996  | 3.58E-05 | 1.24E-05 | 0.011943952 |
| Bacteroidetes    | Prevotella_1                           | 0      | 0.1688 | 0.8312 | 0        | 6.21E-05 | 0.000305941 |
| Chloroflexi      | uncultured_bacterium_c_P2-11E          | 0.1614 | 0.673  | 0.1656 | 3.58E-05 | 0.000149 | 3.67E-05    |
| Proteobacteria   | G55                                    | 0.2419 | 0.4202 | 0.3379 | 0.000429 | 0.000746 | 0.000599645 |
| Proteobacteria   | uncultured_bacterium_o_KI89A_clade     | 0.2312 | 0.6026 | 0.1661 | 0.000119 | 0.000311 | 8.57E-05    |



|                           |                                                  |        |        |        |          |          |             |
|---------------------------|--------------------------------------------------|--------|--------|--------|----------|----------|-------------|
| Proteobacteria            | Acinetobacter                                    | 0.0316 | 0.5357 | 0.4326 | 0.000298 | 0.005046 | 0.004075139 |
| Chloroflexi               | Unclassified                                     | 0.3295 | 0.3392 | 0.3312 | 0.002898 | 0.002983 | 0.002912562 |
| Actinobacteria            | Bifidobacterium                                  | 0.3481 | 0.0972 | 0.5547 | 0.004185 | 0.001168 | 0.006669522 |
| Saccharibacteria          | uncultured_Candidatus_Saccharibacteria_bacterium | 0.413  | 0.4532 | 0.1339 | 0.000227 | 0.000249 | 7.34E-05    |
| Proteobacteria            | uncultured_bacterium_f_B79                       | 0.4184 | 0.5816 | 0      | 0.000107 | 0.000149 | 0           |
| Firmicutes                | Listeria                                         | 0      | 0      | 1      | 0        | 0        | 0.000562932 |
| Gemmatimonadetes          | Unclassified                                     | 0.2561 | 0.5161 | 0.2278 | 0.000179 | 0.00036  | 0.00015909  |
| Proteobacteria            | Wolbachia                                        | 0.0514 | 0      | 0.9486 | 1.19E-05 | 0        | 0.000220278 |
| Candidatus_Berkelbacteria | Unclassified                                     | 0.435  | 0.4534 | 0.1116 | 9.54E-05 | 9.94E-05 | 2.45E-05    |
| Acidobacteria             | Vicinamibacter                                   | 0.234  | 0.2673 | 0.4987 | 0.00124  | 0.001417 | 0.002643334 |
| Proteobacteria            | Methylobacter                                    | 0.2449 | 0.3112 | 0.4439 | 0.000763 | 0.000969 | 0.001382855 |
| Firmicutes                | Ruminococcaceae_UCG-003                          | 0.4529 | 0.3147 | 0.2324 | 7.15E-05 | 4.97E-05 | 3.67E-05    |
| Proteobacteria            | uncultured_bacterium_f_Methylobacteriaceae       | 0.1982 | 0.3773 | 0.4245 | 0.000274 | 0.000522 | 0.000587407 |
| Tenericutes               | Mycoplasma                                       | 0.99   | 0.01   | 0      | 0.001228 | 1.24E-05 | 0           |
| Planctomycetes            | AKYG587                                          | 0.1942 | 0.5667 | 0.2391 | 5.96E-05 | 0.000174 | 7.34E-05    |
| Fusobacteria              | Fusobacterium                                    | 0      | 0.0913 | 0.9087 | 0        | 0.000112 | 0.001113627 |
| Firmicutes                | Weissella                                        | 0.7728 | 0.0531 | 0.1741 | 0.005974 | 0.00041  | 0.001346142 |
| Firmicutes                | Allobaculum                                      | 0.6601 | 0.0506 | 0.2893 | 0.031777 | 0.002436 | 0.013926452 |
| Actinobacteria            | Agromyces                                        | 0.0823 | 0.0889 | 0.8288 | 0.000322 | 0.000348 | 0.003242979 |
| Actinobacteria            | Streptomyces                                     | 0.392  | 0.3891 | 0.2189 | 0.001753 | 0.00174  | 0.000979012 |
| Verrucomicrobia           | uncultured_bacterium_f_DA101_soil_group          | 0.3297 | 0.4537 | 0.2166 | 0.000298 | 0.00041  | 0.000195802 |
| Proteobacteria            | uncultured_bacterium_f_Xanthobacteraceae         | 0.1795 | 0.3074 | 0.5132 | 0.000167 | 0.000286 | 0.000477269 |
| Firmicutes                | Ezakiella                                        | 0      | 0      | 1      | 0        | 0        | 0.000256991 |
| Acidobacteria             | Candidatus_Solibacter                            | 0.3597 | 0.3718 | 0.2685 | 0.001443 | 0.001491 | 0.001076914 |
| Proteobacteria            | uncultured_bacterium_f_JG34-KF-361               | 0.0312 | 0.4882 | 0.4806 | 1.19E-05 | 0.000186 | 0.000183565 |
| Proteobacteria            | Nordella                                         | 0.4    | 0.2021 | 0.3979 | 0.001944 | 0.000982 | 0.00193355  |
| Proteobacteria            | Pseudoxanthomonas                                | 0.6136 | 0.3101 | 0.0763 | 0.000393 | 0.000199 | 4.90E-05    |
| Proteobacteria            | uncultured_bacterium_f_Bradyrhizobiaceae         | 0.3238 | 0.3069 | 0.3693 | 0.00118  | 0.001119 | 0.001346142 |
| Firmicutes                | Oscillibacter                                    | 0.5304 | 0.1974 | 0.2722 | 0.000167 | 6.21E-05 | 8.57E-05    |

|                  |                                          |        |        |        |          |          |             |
|------------------|------------------------------------------|--------|--------|--------|----------|----------|-------------|
| Chloroflexi      | uncultured_bacterium_f_AKIW781           | 0.0302 | 0.6136 | 0.3563 | 2.38E-05 | 0.000485 | 0.000281466 |
| Proteobacteria   | uncultured_bacterium_f_Acetobacteraceae  | 0.1128 | 0.7642 | 0.123  | 0.000191 | 0.001293 | 0.00020804  |
| Acidobacteria    | RB41                                     | 0.361  | 0.3234 | 0.3156 | 0.0062   | 0.005556 | 0.005421281 |
| Proteobacteria   | Azohydromonas                            | 0.2112 | 0.2817 | 0.507  | 0.001407 | 0.001877 | 0.003377593 |
| Acidobacteria    | uncultured_bacterium_c_Subgroup_15       | 0.4167 | 0.1862 | 0.3971 | 0.000167 | 7.46E-05 | 0.00015909  |
| Firmicutes       | [Eubacterium]_coprostanoligenes_group    | 0.711  | 0.0488 | 0.2402 | 0.007786 | 0.000534 | 0.002631096 |
| Proteobacteria   | uncultured_bacterium_f_DUNssu044         | 0.0459 | 0.7183 | 0.2357 | 1.19E-05 | 0.000186 | 6.12E-05    |
| Proteobacteria   | Sandaracinus                             | 0.3552 | 0.3249 | 0.3199 | 0.000584 | 0.000534 | 0.000526219 |
| Actinobacteria   | uncultured_bacterium_f_Acidimicrobiaceae | 0.3307 | 0.3718 | 0.2975 | 0.001061 | 0.001193 | 0.000954537 |
| Bacteroidetes    | Sporocytophaga                           | 0.1426 | 0.4459 | 0.4116 | 0.000191 | 0.000597 | 0.000550694 |
| Armatimonadetes  | uncultured_bacterium_f_Fimbriimonadaceae | 0.4177 | 0.3199 | 0.2625 | 0.000584 | 0.000447 | 0.00036713  |
| Tenericutes      | Anaeroplasma                             | 0.556  | 0.0059 | 0.4381 | 0.00118  | 1.24E-05 | 0.000930062 |
| Proteobacteria   | Brevundimonas                            | 0.1877 | 0.2152 | 0.5971 | 0.000119 | 0.000137 | 0.000379367 |
| Proteobacteria   | Thiobacillus                             | 0.9947 | 0      | 0.0053 | 0.002301 | 0        | 1.22E-05    |
| Proteobacteria   | Chelatococcus                            | 0      | 0      | 1      | 0        | 0        | 2.45E-05    |
| Bacteroidetes    | Alistipes                                | 0.261  | 0.033  | 0.7061 | 0.000393 | 4.97E-05 | 0.001064676 |
| Firmicutes       | Christensenellaceae_R-7_group            | 0.2571 | 0.1443 | 0.5987 | 0.00031  | 0.000174 | 0.000722022 |
| Actinobacteria   | Luedemannella                            | 0.0971 | 0.367  | 0.5358 | 9.54E-05 | 0.00036  | 0.000526219 |
| Proteobacteria   | Bradyrhizobium                           | 0.2544 | 0.2902 | 0.4554 | 0.00378  | 0.004313 | 0.006767423 |
| Actinobacteria   | Actinoplanes                             | 0.1795 | 0.2941 | 0.5264 | 8.35E-05 | 0.000137 | 0.000244753 |
| Firmicutes       | Tyzzereella                              | 0.5829 | 0.0927 | 0.3245 | 0.000704 | 0.000112 | 0.000391605 |
| Fibrobacteres    | possible_genus_04                        | 0.1181 | 0.1847 | 0.6972 | 9.54E-05 | 0.000149 | 0.000562932 |
| Proteobacteria   | Rhodoplanes                              | 0.4257 | 0.3359 | 0.2383 | 0.006427 | 0.005071 | 0.003597871 |
| Proteobacteria   | uncultured_bacterium_f_Nannocystaceae    | 0.0631 | 0.8639 | 0.0729 | 9.54E-05 | 0.001305 | 0.000110139 |
| Proteobacteria   | Hyphomicrobium                           | 0.2574 | 0.4312 | 0.3114 | 0.000334 | 0.000559 | 0.000403843 |
| Gemmatimonadetes | Gemmatimonas                             | 0.161  | 0.403  | 0.436  | 0.001812 | 0.004537 | 0.0049073   |
| Bacteroidetes    | Prevotella                               | 0      | 0.152  | 0.848  | 0        | 3.73E-05 | 0.00020804  |
| Proteobacteria   | uncultured_bacterium_f_SM2D12            | 0.6044 | 0.0573 | 0.3383 | 0.000262 | 2.49E-05 | 0.000146852 |
| Acidobacteria    | Blastocatella                            | 0.1442 | 0.0334 | 0.8224 | 0.000107 | 2.49E-05 | 0.000611883 |

|                 |                                                 |        |        |        |          |          |             |
|-----------------|-------------------------------------------------|--------|--------|--------|----------|----------|-------------|
| Bacteroidetes   | Crocinitomix                                    | 0.2081 | 0.5784 | 0.2135 | 7.15E-05 | 0.000199 | 7.34E-05    |
| Bacteroidetes   | Parabacteroides                                 | 0.4581 | 0.0081 | 0.5339 | 0.000704 | 1.24E-05 | 0.000819923 |
| Bacteroidetes   | Dyadobacter                                     | 0.145  | 0.7558 | 0.0992 | 3.58E-05 | 0.000186 | 2.45E-05    |
| Actinobacteria  | Nonomuraea                                      | 0.8962 | 0.1038 | 0      | 0.000429 | 4.97E-05 | 0           |
| Proteobacteria  | Psychrobacter                                   | 0      | 0.0989 | 0.9011 | 0        | 4.97E-05 | 0.000452793 |
| Bacteroidetes   | Prevotellaceae_NK3B31_group                     | 0      | 0      | 1      | 0        | 0        | 0.000440556 |
| Firmicutes      | Ruminiclostridium_6                             | 0.4475 | 0.1774 | 0.3752 | 0.000847 | 0.000336 | 0.000709784 |
| Elusimicrobia   | uncultured_bacterium_o_Lineage_IIc              | 0.0781 | 0.0407 | 0.8813 | 2.38E-05 | 1.24E-05 | 0.000269228 |
| Proteobacteria  | uncultured_bacterium_o_NB1-j                    | 0.1455 | 0.6411 | 0.2135 | 0.001359 | 0.005991 | 0.001994738 |
| Acidobacteria   | uncultured_bacterium_o_Subgroup_7               | 0.3842 | 0.3298 | 0.286  | 0.000608 | 0.000522 | 0.000452793 |
| Proteobacteria  | Enhygromyxa                                     | 0.226  | 0.5653 | 0.2087 | 0.000238 | 0.000597 | 0.000220278 |
| FCPU426         | uncultured_bacterium_p_FCPU426                  | 0.1727 | 0.3438 | 0.4835 | 0.000131 | 0.000261 | 0.00036713  |
| Tenericutes     | Unclassified                                    | 0.7034 | 0.0713 | 0.2253 | 0.003553 | 0.00036  | 0.001138102 |
| Acidobacteria   | uncultured_bacterium_c_Subgroup_6               | 0.3299 | 0.3928 | 0.2774 | 0.025219 | 0.030029 | 0.021207857 |
| Proteobacteria  | Silanimonas                                     | 0      | 1      | 0      | 0        | 0.000957 | 0           |
| Bacteroidetes   | uncultured_bacterium_f_Saprospiraceae           | 0.4406 | 0.1847 | 0.3747 | 0.00341  | 0.001429 | 0.002900324 |
| Firmicutes      | Lachnoclostridium                               | 0.2472 | 0.0892 | 0.6636 | 0.00031  | 0.000112 | 0.000832161 |
| Proteobacteria  | Falsirhodobacter                                | 0      | 0.0922 | 0.9078 | 0        | 1.24E-05 | 0.000122377 |
| Proteobacteria  | uncultured_bacterium_f_Polyangiaceae            | 0.1211 | 0.5556 | 0.3233 | 0.000477 | 0.002188 | 0.001272716 |
| Bacteroidetes   | Cloacibacterium                                 | 0.0263 | 0.0549 | 0.9188 | 1.19E-05 | 2.49E-05 | 0.00041608  |
| Proteobacteria  | uncultured_bacterium_f_Hyphomonadaceae          | 0.1608 | 0.8297 | 0.0095 | 0.001657 | 0.008551 | 9.79E-05    |
| Armatimonadetes | uncultured_bacterium_o_Chthonomonadales         | 0.3572 | 0.4717 | 0.1711 | 0.000179 | 0.000236 | 8.57E-05    |
| Bacteroidetes   | uncultured_bacterium_f_Chitinophagaceae         | 0.3301 | 0.4625 | 0.2074 | 0.015251 | 0.021366 | 0.009582084 |
| Acidobacteria   | Bryobacter                                      | 0.3285 | 0.447  | 0.2245 | 0.005425 | 0.007383 | 0.00370801  |
| Firmicutes      | Lachnospiraceae_NK4A136_group                   | 0.7501 | 0.0519 | 0.198  | 0.014368 | 0.000994 | 0.003793673 |
| Microgenomates  | uncultured_bacterium_c_Candidatus_Woesebacteria | 0.8365 | 0.1635 | 0      | 0.000191 | 3.73E-05 | 0           |
| Firmicutes      | Ruminiclostridium_1                             | 0      | 0      | 1      | 0        | 0        | 0.000293704 |
| Proteobacteria  | Sulfurifustis                                   | 0.449  | 0.1634 | 0.3876 | 0.000751 | 0.000273 | 0.000648596 |
| Firmicutes      | uncultured_bacterium_f_Erysipelotrichaceae      | 0.5245 | 0.0954 | 0.3801 | 0.015298 | 0.002784 | 0.011087316 |

|                 |                                                      |        |        |        |          |          |             |
|-----------------|------------------------------------------------------|--------|--------|--------|----------|----------|-------------|
| Armatimonadetes | Unclassified                                         | 0.1817 | 0.6629 | 0.1554 | 0.000143 | 0.000522 | 0.000122377 |
| Bacteroidetes   | Ohtaekwangia                                         | 0.2221 | 0.6755 | 0.1024 | 0.003053 | 0.009285 | 0.00140733  |
| Actinobacteria  | Brevibacterium                                       | 0.1924 | 0.1543 | 0.6533 | 0.000155 | 0.000124 | 0.000526219 |
| Cyanobacteria   | Microcoleus                                          | 0      | 0      | 1      | 0        | 0        | 0.003720247 |
| Proteobacteria  | Rhodomicrobium                                       | 0.3231 | 0.279  | 0.3979 | 0.000417 | 0.00036  | 0.000513982 |
| Chloroflexi     | uncultured_bacterium_c_SBR2076                       | 0.2197 | 0.4581 | 0.3222 | 0.000167 | 0.000348 | 0.000244753 |
| Proteobacteria  | uncultured_bacterium_f_BIrii41                       | 0.2797 | 0.4542 | 0.2661 | 0.007202 | 0.011696 | 0.006853087 |
| Proteobacteria  | H16                                                  | 0.3448 | 0.3947 | 0.2605 | 0.003887 | 0.00445  | 0.002937037 |
| Bacteroidetes   | Adhaeribacter                                        | 0.354  | 0.5422 | 0.1038 | 0.000584 | 0.000895 | 0.000171327 |
| Bacteroidetes   | Odoribacter                                          | 0.1028 | 0      | 0.8972 | 2.38E-05 | 0        | 0.00020804  |
| Proteobacteria  | Parasutterella                                       | 0.5159 | 0.0232 | 0.4609 | 0.001657 | 7.46E-05 | 0.001480756 |
| Bacteroidetes   | Barnesiella                                          | 0.3276 | 0      | 0.6724 | 1.19E-05 | 0        | 2.45E-05    |
| Acidobacteria   | DS-100                                               | 0.2405 | 0.2802 | 0.4792 | 0.000203 | 0.000236 | 0.000403843 |
| Proteobacteria  | uncultured_bacterium_f_Methylophilaceae              | 0.6932 | 0.2575 | 0.0493 | 0.001204 | 0.000447 | 8.57E-05    |
| Cloacimonetes   | Unclassified                                         | 0      | 0      | 1      | 0        | 0        | 1.22E-05    |
| Actinobacteria  | Lawsonella                                           | 0.1376 | 0.1304 | 0.7319 | 0.000131 | 0.000124 | 0.000697546 |
| Proteobacteria  | Rubellimicrobium                                     | 0.1954 | 0.1697 | 0.6349 | 7.15E-05 | 6.21E-05 | 0.000232515 |
| Firmicutes      | Streptococcus                                        | 0.2342 | 0.1436 | 0.6222 | 0.000203 | 0.000124 | 0.000538457 |
| Proteobacteria  | Cellvibrio                                           | 0.3364 | 0.2869 | 0.3767 | 0.000131 | 0.000112 | 0.000146852 |
| Planctomycetes  | uncultured_bacterium_c_BD7-11                        | 0.4342 | 0.5658 | 0      | 9.54E-05 | 0.000124 | 0           |
| BRC1            | uncultured_bacterium_p_BRC1                          | 0.4923 | 0.1579 | 0.3498 | 0.000155 | 4.97E-05 | 0.000110139 |
| Acidobacteria   | Aridibacter                                          | 0.2744 | 0.2503 | 0.4753 | 0.000191 | 0.000174 | 0.000330417 |
| Proteobacteria  | Burkholderia-Paraburkholderia                        | 0.6089 | 0.1145 | 0.2766 | 0.002909 | 0.000547 | 0.001321667 |
| Planctomycetes  | uncultured_bacterium_f_Phycisphaeraceae              | 0.3307 | 0.6128 | 0.0566 | 0.000215 | 0.000398 | 3.67E-05    |
| Firmicutes      | uncultured_bacterium_f_Clostridiales_vadinBB60_group | 1      | 0      | 0      | 0.000119 | 0        | 0           |
| Proteobacteria  | Undibacterium                                        | 0      | 1      | 0      | 0        | 0.000447 | 0           |
| Actinobacteria  | uncultured_bacterium_o_Gaiellales                    | 0.2528 | 0.4865 | 0.2608 | 0.002325 | 0.004474 | 0.00239858  |
| Actinobacteria  | Jatrophihabitans                                     | 0.0727 | 0.4547 | 0.4726 | 3.58E-05 | 0.000224 | 0.000232515 |
| Proteobacteria  | uncultured_bacterium_f_Xanthomonadaceae              | 0.3687 | 0.1824 | 0.4489 | 0.000704 | 0.000348 | 0.000856636 |

|                 |                                           |        |        |        |          |          |             |
|-----------------|-------------------------------------------|--------|--------|--------|----------|----------|-------------|
| Bacteroidetes   | Terrimonas                                | 0.2302 | 0.3547 | 0.4151 | 0.003637 | 0.005606 | 0.006559383 |
| Proteobacteria  | uncultured_bacterium_f_Caulobacteraceae   | 0.2471 | 0.1442 | 0.6087 | 0.000298 | 0.000174 | 0.000734259 |
| Actinobacteria  | Amycolatopsis                             | 0.359  | 0.3061 | 0.3349 | 0.000131 | 0.000112 | 0.000122377 |
| Spirochaetae    | uncultured_Spirochaetales_bacterium       | 0.0709 | 0.0555 | 0.8736 | 4.77E-05 | 3.73E-05 | 0.000587407 |
| Cyanobacteria   | Chroococcidiopsis                         | 0      | 0      | 1      | 0        | 0        | 0.037887781 |
| Proteobacteria  | Pseudolabrys                              | 0.2953 | 0.3848 | 0.3199 | 0.000429 | 0.000559 | 0.000465031 |
| Proteobacteria  | Rhizobacter                               | 0.412  | 0.4294 | 0.1586 | 0.000191 | 0.000199 | 7.34E-05    |
| Proteobacteria  | Campylobacter                             | 0      | 0      | 1      | 0        | 0        | 0.000403843 |
| WS6             | uncultured_bacterium_p_WS6                | 0.0301 | 0.1302 | 0.8397 | 8.35E-05 | 0.00036  | 0.002325155 |
| Bacteroidetes   | vadinBC27_wastewater-sludge_group         | 0      | 0      | 1      | 0        | 0        | 0.000269228 |
| Proteobacteria  | Tahibacter                                | 0.7184 | 0.1291 | 0.1525 | 0.000346 | 6.21E-05 | 7.34E-05    |
| Firmicutes      | Blautia                                   | 0.0464 | 0.0161 | 0.9374 | 3.58E-05 | 1.24E-05 | 0.000722022 |
| Firmicutes      | [Eubacterium]_nodatum_group               | 0.5848 | 0.1084 | 0.3068 | 0.000537 | 9.94E-05 | 0.000281466 |
| Proteobacteria  | BD1-7_clade                               | 0.0584 | 0.8518 | 0.0899 | 2.38E-05 | 0.000348 | 3.67E-05    |
| Actinobacteria  | uncultured_bacterium_f_Micromonosporaceae | 0.1818 | 0.417  | 0.4012 | 0.000954 | 0.002188 | 0.002104877 |
| Actinobacteria  | Janibacter                                | 0.2335 | 0.3772 | 0.3894 | 0.000477 | 0.000771 | 0.000795448 |
| Firmicutes      | Planomicrobium                            | 0      | 0      | 1      | 0        | 0        | 0.000673071 |
| Deferribacteres | Mucispirillum                             | 0.1028 | 0.0536 | 0.8437 | 7.15E-05 | 3.73E-05 | 0.000587407 |
| Verrucomicrobia | Roseimicrobium                            | 0.0827 | 0.1857 | 0.7315 | 0.000155 | 0.000348 | 0.001370617 |
| Firmicutes      | uncultured_bacterium_f_Lachnospiraceae    | 0.5253 | 0.2134 | 0.2613 | 0.003518 | 0.001429 | 0.001749985 |
| Proteobacteria  | uncultured_bacterium_o_Xanthomonadales    | 0.2723 | 0.3802 | 0.3475 | 0.022572 | 0.03152  | 0.02880744  |
| Chloroflexi     | uncultured_bacterium_f_Caldilineaceae     | 0.624  | 0.3111 | 0.065  | 0.000823 | 0.00041  | 8.57E-05    |
| Firmicutes      | Ruminococcus_2                            | 0.6234 | 0.0706 | 0.306  | 0.000549 | 6.21E-05 | 0.000269228 |
| Parcubacteria   | uncultured_bacterium_p_Parcubacteria      | 0.2557 | 0.2417 | 0.5026 | 0.001407 | 0.00133  | 0.00276571  |
| Actinobacteria  | Mycobacterium                             | 0.1943 | 0.5065 | 0.2992 | 0.000119 | 0.000311 | 0.000183565 |
| Nitrospirae     | uncultured_bacterium_f_Nitrospiraceae     | 1      | 0      | 0      | 0.00025  | 0        | 0           |
| Proteobacteria  | Rhizomicrobium                            | 0.2379 | 0.3712 | 0.3909 | 0.002063 | 0.003219 | 0.003389831 |
| Actinobacteria  | Paenarthrobacter                          | 0.0663 | 0.1435 | 0.7902 | 0.000155 | 0.000336 | 0.001847886 |
| Chlorobi        | uncultured_bacterium_f_SJA-28             | 0.6039 | 0.1144 | 0.2817 | 0.000131 | 2.49E-05 | 6.12E-05    |

|                          |                                           |        |        |        |          |          |             |
|--------------------------|-------------------------------------------|--------|--------|--------|----------|----------|-------------|
| Proteobacteria           | uncultured_bacterium_f_RB446              | 0.033  | 0.2061 | 0.761  | 2.38E-05 | 0.000149 | 0.000550694 |
| Proteobacteria           | Phenylobacterium                          | 0.2283 | 0.4492 | 0.3225 | 0.003172 | 0.006239 | 0.004478982 |
| Acidobacteria            | uncultured_bacterium_f_Sva0725            | 0.3389 | 0.4225 | 0.2387 | 0.000608 | 0.000758 | 0.000428318 |
| Firmicutes               | Fusicatenibacter                          | 0.0813 | 0.0424 | 0.8763 | 2.38E-05 | 1.24E-05 | 0.000256991 |
| Proteobacteria           | Rhizobium                                 | 0.4046 | 0.3984 | 0.197  | 0.00279  | 0.002747 | 0.00135838  |
| Firmicutes               | Eisenbergiella                            | 0.8656 | 0.017  | 0.1173 | 0.000632 | 1.24E-05 | 8.57E-05    |
| Proteobacteria           | Altererythrobacter                        | 0.29   | 0.342  | 0.368  | 0.005902 | 0.00696  | 0.007489445 |
| Proteobacteria           | Sphingopyxis                              | 0.6248 | 0.1452 | 0.2301 | 0.005616 | 0.001305 | 0.002068164 |
| Proteobacteria           | Ensifer                                   | 0.2584 | 0.1243 | 0.6172 | 0.00062  | 0.000298 | 0.001480756 |
| Proteobacteria           | Caenimonas                                | 0.1572 | 0.6591 | 0.1838 | 0.001025 | 0.0043   | 0.00119929  |
| Firmicutes               | [Ruminococcus]_torques_group              | 0.2027 | 0      | 0.7973 | 7.15E-05 | 0        | 0.000281466 |
| Acidobacteria            | Elev-16S-1166                             | 0.2431 | 0.549  | 0.2079 | 7.15E-05 | 0.000162 | 6.12E-05    |
| Actinobacteria           | Rhizocola                                 | 0.2923 | 0.5044 | 0.2033 | 0.001073 | 0.001852 | 0.000746497 |
| Proteobacteria           | Woodsholea                                | 0.2872 | 0.4224 | 0.2903 | 0.004758 | 0.006998 | 0.004809399 |
| Actinobacteria           | Iamia                                     | 0.4403 | 0.4074 | 0.1522 | 0.00223  | 0.002063 | 0.000770972 |
| SR1_[Absconditabacteria] | Unclassified                              | 1      | 0      | 0      | 0.000942 | 0        | 0           |
| Cyanobacteria            | uncultured_bacterium_o_Obscuribacterales  | 0.4114 | 0.4612 | 0.1275 | 0.000632 | 0.000708 | 0.000195802 |
| Bacteroidetes            | Mucilaginibacter                          | 1      | 0      | 0      | 0.000417 | 0        | 0           |
| Proteobacteria           | Helicobacter                              | 0.1461 | 0.0842 | 0.7697 | 0.000453 | 0.000261 | 0.002386343 |
| Microgenomates           | Unclassified                              | 0.4439 | 0.2454 | 0.3107 | 0.000787 | 0.000435 | 0.000550694 |
| Proteobacteria           | uncultured_bacterium_f_Sneathiellaceae    | 0      | 0.3089 | 0.6911 | 0        | 0.000137 | 0.000305941 |
| Proteobacteria           | Reyranella                                | 0.3365 | 0.4982 | 0.1653 | 0.003887 | 0.005755 | 0.001909074 |
| Microgenomates           | uncultured_Microgenomates_group_bacterium | 0.703  | 0.1166 | 0.1804 | 0.000525 | 8.70E-05 | 0.000134614 |
| Proteobacteria           | Variibacter                               | 0.215  | 0.3705 | 0.4145 | 0.002754 | 0.004748 | 0.005311142 |
| Proteobacteria           | Polaromonas                               | 0.3696 | 0.2    | 0.4304 | 0.00062  | 0.000336 | 0.000722022 |
| Proteobacteria           | OM27_clade                                | 0.124  | 0.3716 | 0.5044 | 0.000668 | 0.002001 | 0.002716759 |
| Firmicutes               | Erysipelotrichaceae_UCG-007               | 0      | 0      | 1      | 0        | 0        | 0.000281466 |
| Proteobacteria           | Unclassified                              | 0.2349 | 0.373  | 0.392  | 0.020342 | 0.032303 | 0.033947256 |
| Latescibacteria          | Unclassified                              | 0.1546 | 0.6588 | 0.1867 | 0.000405 | 0.001728 | 0.000489506 |

|                    |                                                |        |        |        |          |          |             |
|--------------------|------------------------------------------------|--------|--------|--------|----------|----------|-------------|
| Proteobacteria     | Pedomicrobium                                  | 0.2761 | 0.3647 | 0.3591 | 0.002587 | 0.003418 | 0.003365355 |
| Proteobacteria     | Craurococcus                                   | 0      | 0.109  | 0.891  | 0        | 0.000124 | 0.001015725 |
| Proteobacteria     | Vibrio                                         | 0.0616 | 0.0642 | 0.8742 | 7.15E-05 | 7.46E-05 | 0.001015725 |
| TM6_[Dependentiae] | Unclassified                                   | 0.5922 | 0.1715 | 0.2364 | 0.000215 | 6.21E-05 | 8.57E-05    |
| Proteobacteria     | Acidovorax                                     | 0.039  | 0.1015 | 0.8595 | 2.38E-05 | 6.21E-05 | 0.000526219 |
| Microgenomates     | uncultured_bacterium_c_Candidatus_Pacebacteria | 0      | 0      | 1      | 0        | 0        | 0.000428318 |
| Firmicutes         | Ruminococcaceae_UCG-013                        | 0.3928 | 0.1638 | 0.4434 | 0.000596 | 0.000249 | 0.000673071 |
| Proteobacteria     | uncultured_bacterium_o_Myxococcales            | 0.3195 | 0.2789 | 0.4016 | 0.000954 | 0.000833 | 0.00119929  |
| Verrucomicrobia    | Opitutus                                       | 0.367  | 0.3461 | 0.2869 | 0.003756 | 0.003542 | 0.002937037 |
| Proteobacteria     | Pseudohongiella                                | 0.1427 | 0.2998 | 0.5575 | 0.000799 | 0.001678 | 0.003120602 |
| Proteobacteria     | Stenotrophomonas                               | 0.6024 | 0.0149 | 0.3827 | 0.000501 | 1.24E-05 | 0.000318179 |
| Firmicutes         | Ruminiclostridium                              | 0      | 0      | 1      | 0        | 0        | 7.34E-05    |
| Firmicutes         | Faecalibacterium                               | 0.072  | 0.2814 | 0.6466 | 4.77E-05 | 0.000186 | 0.000428318 |
| Actinobacteria     | Propionibacterium                              | 0.0658 | 0.1016 | 0.8326 | 0.000322 | 0.000497 | 0.004075139 |
| Firmicutes         | Lachnospiraceae_UCG-006                        | 0.8806 | 0.0602 | 0.0593 | 0.000727 | 4.97E-05 | 4.90E-05    |
| Proteobacteria     | Mesorhizobium                                  | 0.2097 | 0.2676 | 0.5227 | 0.000584 | 0.000746 | 0.001456281 |
| Firmicutes         | [Eubacterium]_xylanophilum_group               | 0.6042 | 0.1121 | 0.2838 | 0.001407 | 0.000261 | 0.000660833 |
| Proteobacteria     | Haliangium                                     | 0.267  | 0.3319 | 0.4011 | 0.011519 | 0.014318 | 0.017304045 |

**Supplemental Table S6** Fungal Statistics of sample sequencing data processing results.

| Treatments | PE Reads | Raw Tags | Clean Tags | Effective Tags | AvgLen (bp) | GC(%) | Q20(%) | Q30(%) | Effective(%) |
|------------|----------|----------|------------|----------------|-------------|-------|--------|--------|--------------|
| CK         | 78104    | 50066    | 44379      | 44247          | 256         | 49.62 | 98.11  | 95.47  | 56.65        |
| J1F1       | 119474   | 91681    | 81275      | 78004          | 266         | 45.6  | 97.55  | 94.63  | 65.29        |
| J1F2       | 79973    | 68360    | 60769      | 60398          | 244         | 48.44 | 99.08  | 97.6   | 75.52        |
| J2F1       | 105266   | 75704    | 66668      | 66667          | 278         | 53.13 | 97.41  | 94.01  | 63.33        |
| J2F2       | 63524    | 43187    | 37869      | 37862          | 262         | 48.97 | 97.68  | 94.75  | 59.6         |
| J3F1       | 80198    | 68273    | 60854      | 60473          | 240         | 48.69 | 99.17  | 97.75  | 75.4         |
| J3F2       | 197798   | 147285   | 132121     | 131842         | 235         | 48.54 | 98.76  | 96.67  | 66.65        |
| Summation  |          |          |            | 479493         |             |       |        |        |              |



**Supplemental Table S7** Fungal Principal Component Analysis.

| Treatments | PC1        | PC2         | PC3         |
|------------|------------|-------------|-------------|
| CK         | -0.00269   | -0.00577    | 0.016874    |
| J1F1       | -0.00664   | 0.023305    | -0.00144    |
| J1F2       | -0.00333   | -0.00275    | 0.00993     |
| J2F1       | -0.00421   | -0.00675    | -0.01654    |
| J2F2       | -0.00401   | -0.00735    | -0.00611    |
| J3F1       | -0.00345   | -0.0032     | -0.00147    |
| J3F2       | 0.024329   | 0.00251     | -0.00124    |
| Loading    | 73.9104247 | 22.55023525 | 1.836721057 |

**Supplemental Table S8** Fungal microbial community.**a. phylum**

| phylum            | CK       | J1F1     | J1F2     | J2F1     | J2F2     | J3F1     | J3F2     |
|-------------------|----------|----------|----------|----------|----------|----------|----------|
| Ascomycota        | 0.57598  | 0.402135 | 0.662929 | 0.320805 | 0.499204 | 0.614473 | 0.717329 |
| Unclassified      | 0.086975 | 0.138458 | 0.126753 | 0.128178 | 0.29495  | 0.156851 | 0.044007 |
| Basidiomycota     | 0.074855 | 0.25203  | 0.121127 | 0.047727 | 0.079167 | 0.129293 | 0.223941 |
| Mortierellomycota | 0.031746 | 0.180018 | 0.066434 | 0.019115 | 0.023449 | 0.05662  | 0.004599 |
| Cercozoa          | 0.008608 | 0.006391 | 0.00125  | 0.00695  | 0.059124 | 0.001561 | 0        |
| Glomeromycota     | 0.015885 | 0.001729 | 0.000469 | 0.012457 | 0.019736 | 0.002717 | 0.001146 |
| Chytridiomycota   | 0        | 0.008471 | 0.003868 | 0.014728 | 0.002792 | 0.003045 | 0.001123 |
| Anthophyta        | 0        | 0        | 0        | 0        | 0        | 0.016978 | 0        |
| Rotifera          | 0.011156 | 0.000419 | 0        | 0.000936 | 0.001898 | 0.001677 | 0        |
| Olpidiomycota     | 0        | 0.004229 | 0.000566 | 0        | 0        | 3.85E-05 | 0        |
| Rozellomycota     | 0        | 0        | 0.004317 | 0        | 0        | 0.000501 | 0        |
| Aphelidiomycota   | 0        | 0        | 0.001778 | 0        | 0        | 0.001985 | 0        |
| Mucoromycota      | 0        | 0        | 0        | 0        | 0        | 0.001214 | 0.001436 |
| Unknown           | 0.194794 | 0.00612  | 0.010509 | 0.449105 | 0.01968  | 0.013047 | 0.006418 |

**b. genus**

| genus            | CK       | J1F1     | J1F2     | J2F1     | J2F2     | J3F1     | J3F2     |
|------------------|----------|----------|----------|----------|----------|----------|----------|
| Unclassified     | 0.242884 | 0.38657  | 0.390417 | 0.313395 | 0.591157 | 0.460301 | 0.299564 |
| Mortierella      | 0.031746 | 0.180018 | 0.065183 | 0.015694 | 0.023449 | 0.05504  | 0.004599 |
| Cladosporium     | 0.08445  | 0.007485 | 0.075399 | 0.019668 | 0.090026 | 0.035787 | 0.031042 |
| Aspergillus      | 0.060555 | 0.042829 | 0.043697 | 0.005799 | 0.005583 | 0.029023 | 0.05261  |
| Fusarium         | 0.033652 | 0.003418 | 0.011935 | 0.000445 | 0.007007 | 0.017113 | 0.107826 |
| Rhodotorula      | 0        | 1.35E-05 | 0.004551 | 6.14E-05 | 5.58E-05 | 0.007304 | 0.144384 |
| Penicillium      | 0.029635 | 0.018253 | 0.030961 | 0.013823 | 0.014209 | 0.018347 | 0.015227 |
| Melanophyllum    | 0        | 0.090144 | 0        | 0        | 0.001284 | 0        | 0        |
| Alternaria       | 0.014393 | 9.46E-05 | 0.012111 | 0.008192 | 0.021774 | 0.010503 | 0.007312 |
| Candida          | 0.042329 | 0        | 0.005294 | 1.53E-05 | 0.00321  | 0.008826 | 0.010689 |
| Malassezia       | 0.007644 | 0.000446 | 0.016154 | 0.012488 | 0.001619 | 0.007265 | 0.021026 |
| Verticillium     | 0.013543 | 0.010106 | 0.013459 | 0.008422 | 0.004885 | 0.012006 | 0.003438 |
| Plectosphaerella | 0.008287 | 0.016402 | 0.004395 | 0        | 0.010999 | 0.00397  | 0.010918 |
| Gibberella       | 0.014301 | 0.004053 | 0.014963 | 0        | 0.001647 | 0.014762 | 0.004447 |
| Colletotrichum   | 0        | 0.000838 | 0.004063 | 0.003007 | 0.001256 | 0.000424 | 0.040287 |
| Lindtneria       | 0        | 0.048315 | 0        | 0        | 0.000698 | 0        | 0        |
| Chaetomium       | 0.016137 | 0.005256 | 0.014455 | 0        | 2.79E-05 | 0.011813 | 0        |
| Myrothecium      | 0.024585 | 0        | 0.003692 | 0        | 0        | 0.002968 | 0.005211 |
| Didymella        | 0.007414 | 0.000797 | 0.004395 | 0.010923 | 0.004383 | 0.005627 | 0.001879 |
| Trichoderma      | 0.004293 | 0.005418 | 0.006055 | 3.07E-05 | 0.007342 | 0.006205 | 0.005753 |
| Others           | 0.16936  | 0.173424 | 0.268313 | 0.138932 | 0.189711 | 0.279669 | 0.227372 |
| Unknown          | 0.194794 | 0.00612  | 0.010509 | 0.449105 | 0.01968  | 0.013047 | 0.006418 |

**Supplemental Table S9** Ternary diagram, CK, J1 and J2 groups in the fungal phylum level.

| Phylum          | Genus           | CK_ratio | F1_ratio | F2_ratio | CK_reabundance | F1_reabundance | F2_reabundance |
|-----------------|-----------------|----------|----------|----------|----------------|----------------|----------------|
| Basidiomycota   | Clavulina       | 0        | 1        | 0        | 0              | 0.000691       | 0              |
| Ascomycota      | Lulwoana        | 0        | 0        | 1        | 0              | 0              | 0.000972905    |
| Ascomycota      | Dekkera         | 0        | 1        | 0        | 0              | 0.001779       | 0              |
| Ascomycota      | Stilbella       | 0        | 0.443    | 0.557    | 0              | 0.000989       | 0.001243667    |
| Ascomycota      | Aspergillus     | 0.4666   | 0.2038   | 0.3297   | 0.060555       | 0.026449       | 0.042784896    |
| Ascomycota      | Debaryomyces    | 0        | 0        | 1        | 0              | 0              | 0.00022487     |
| Ascomycota      | Arthrographis   | 0.9787   | 0        | 0.0213   | 0.008838       | 0              | 0.000192745    |
| Chytridiomycota | Unclassified    | 0        | 0.791    | 0.209    | 0              | 0.004464       | 0.001179418    |
| Ascomycota      | Graphium        | 0        | 1        | 0        | 0              | 0.000157       | 0              |
| Basidiomycota   | Rhodotorula     | 0        | 0.0224   | 0.9776   | 0              | 0.00201        | 0.087804721    |
| Ascomycota      | Pochonia        | 0        | 0.5128   | 0.4872   | 0              | 0.000126       | 0.000119319    |
| Ascomycota      | Didymella       | 0.4675   | 0.3508   | 0.1817   | 0.007414       | 0.005563       | 0.002882003    |
| Ascomycota      | Cyphellophora   | 0        | 0.8422   | 0.1578   | 0              | 0.001298       | 0.000243226    |
| Ascomycota      | Clonostachys    | 0.0307   | 0.487    | 0.4823   | 6.89E-05       | 0.001094       | 0.001083046    |
| Ascomycota      | Epicoccum       | 0        | 0.2329   | 0.7671   | 0              | 0.000644       | 0.0021202      |
| Ascomycota      | Paraphoma       | 0        | 0.3898   | 0.6102   | 0              | 0.001413       | 0.002211983    |
| Ascomycota      | Trichocladium   | 0.1189   | 0.786    | 0.0951   | 2.30E-05       | 0.000152       | 1.84E-05       |
| Ascomycota      | Articulospora   | 0        | 0.809    | 0.191    | 0              | 0.000136       | 3.21E-05       |
| Ascomycota      | Mycothermus     | 0        | 0.0935   | 0.9065   | 0              | 0.000194       | 0.001876973    |
| Ascomycota      | Volutella       | 0        | 0.1515   | 0.8485   | 0              | 6.80E-05       | 0.000380902    |
| Basidiomycota   | Cyathus         | 0        | 1        | 0        | 0              | 0.000958       | 0              |
| Basidiomycota   | Coprinellus     | 0        | 0.6091   | 0.3909   | 0              | 0.000429       | 0.000275351    |
| Basidiomycota   | Russula         | 0        | 0.9511   | 0.0489   | 0              | 0.006248       | 0.000321242    |
| Ascomycota      | Lectera         | 0        | 0.091    | 0.909    | 0              | 0.000408       | 0.004079778    |
| Ascomycota      | Staphylotrichum | 0        | 0.7113   | 0.2887   | 0              | 0.005552       | 0.002253286    |
| Ascomycota      | Sarocladium     | 0.0127   | 0.4565   | 0.5308   | 4.59E-05       | 0.001654       | 0.001922865    |
| Ascomycota      | Chrysosporium   | 0        | 1        | 0        | 0              | 0.000188       | 0              |

|                   |                         |        |        |        |          |          |             |
|-------------------|-------------------------|--------|--------|--------|----------|----------|-------------|
| Basidiomycota     | Aporpium                | 0      | 1      | 0      | 0        | 0.000126 | 0           |
| Basidiomycota     | Erythrobasidium         | 0      | 0.488  | 0.512  | 0        | 0.00269  | 0.002822344 |
| Basidiomycota     | Entoloma                | 0      | 0.3631 | 0.6369 | 0        | 0.000167 | 0.000293707 |
| Glomeromycota     | Funneliformis           | 0      | 1      | 0      | 0        | 0.000502 | 0           |
| Ascomycota        | Minutisphaera           | 0      | 0.0428 | 0.9572 | 0        | 3.14E-05 | 0.000702144 |
| Mortierellomycota | Unclassified            | 0      | 0.8446 | 0.1554 | 0        | 0.001596 | 0.000293707 |
| Ascomycota        | Pseudochaetosphaeronema | 0      | 0      | 1      | 0        | 0        | 0.000619539 |
| Ascomycota        | Verticillium            | 0.4572 | 0.3392 | 0.2036 | 0.013543 | 0.010048 | 0.006030178 |
| Mortierellomycota | Mortierella             | 0.2209 | 0.6265 | 0.1526 | 0.031746 | 0.090027 | 0.021931676 |
| Basidiomycota     | Tomentella              | 0      | 0.5043 | 0.4957 | 0        | 0.001083 | 0.001064689 |
| Ascomycota        | Myrothecium             | 0.8366 | 0.0274 | 0.136  | 0.024585 | 0.000806 | 0.003997173 |
| Ascomycota        | Hyaloseta               | 0      | 0.6258 | 0.3742 | 0        | 0.000115 | 6.88E-05    |
| Ascomycota        | Daldinia                | 0      | 1      | 0      | 0        | 0.000173 | 0           |
| Basidiomycota     | Solicoccozyma           | 0      | 0.3251 | 0.6749 | 0        | 0.001225 | 0.002542404 |
| Basidiomycota     | Craterellus             | 0      | 0.8763 | 0.1237 | 0        | 0.000911 | 0.000128497 |
| Ascomycota        | Malbranchea             | 0      | 0.5273 | 0.4727 | 0        | 0.000235 | 0.000211102 |
| Basidiomycota     | Vishniacozyma           | 0      | 0.5604 | 0.4396 | 0        | 0.003077 | 0.002413907 |
| Ascomycota        | Taphrina                | 0      | 1      | 0      | 0        | 0.000204 | 0           |
| Ascomycota        | Savoryella              | 0      | 0.1331 | 0.8669 | 0        | 3.66E-05 | 0.000238637 |
| Basidiomycota     | Melanophyllum           | 0      | 0.994  | 0.006  | 0        | 0.034916 | 0.000211102 |
| Basidiomycota     | Auricularia             | 0      | 0      | 1      | 0        | 0        | 0.000729679 |
| Basidiomycota     | Schizophyllum           | 0      | 0.0834 | 0.9166 | 0        | 6.80E-05 | 0.000748036 |
| Ascomycota        | Robillarda              | 0      | 1      | 0      | 0        | 0.000204 | 0           |
| Ascomycota        | Trichothecium           | 0      | 0.7767 | 0.2233 | 0        | 0.001612 | 0.000463507 |
| Basidiomycota     | Leucosporidium          | 0      | 0      | 1      | 0        | 0        | 0.000211102 |
| Ascomycota        | Colletotrichum          | 0      | 0.0546 | 0.9454 | 0        | 0.001465 | 0.025359791 |
| Basidiomycota     | Sebacina                | 0      | 0.3107 | 0.6893 | 0        | 8.90E-05 | 0.000197335 |
| Ascomycota        | Lecanicillium           | 0.7433 | 0.1341 | 0.1226 | 0.002755 | 0.000497 | 0.000454329 |
| Basidiomycota     | Flammulina              | 0      | 0      | 1      | 0        | 0        | 0.000715912 |

|               |                   |        |        |        |          |          |             |
|---------------|-------------------|--------|--------|--------|----------|----------|-------------|
| Basidiomycota | Gliophorus        | 0      | 0.0119 | 0.9881 | 0        | 6.80E-05 | 0.005672223 |
| Ascomycota    | Ustilaginoidea    | 0.126  | 0.3448 | 0.5292 | 2.30E-05 | 6.28E-05 | 9.64E-05    |
| Ascomycota    | Exophiala         | 0.747  | 0.1262 | 0.1268 | 0.008516 | 0.001439 | 0.001445591 |
| Ascomycota    | Capronia          | 0      | 1      | 0      | 0        | 0.000387 | 0           |
| Ascomycota    | Beltrania         | 0      | 1      | 0      | 0        | 0.000147 | 0           |
| Basidiomycota | Grammothele       | 0      | 0      | 1      | 0        | 0        | 0.000192745 |
| Basidiomycota | Naganishia        | 0      | 0.2952 | 0.7048 | 0        | 0.000188 | 0.000449739 |
| Ascomycota    | Wallrothiella     | 0      | 0.5391 | 0.4609 | 0        | 0.000209 | 0.000178978 |
| Ascomycota    | Aporospora        | 0      | 0      | 1      | 0        | 0        | 0.000596593 |
| Ascomycota    | Rhinocladiella    | 0      | 0.2404 | 0.7596 | 0        | 0.00078  | 0.002464388 |
| Ascomycota    | Trichoglossum     | 0      | 0.2698 | 0.7302 | 0        | 0.000487 | 0.001317094 |
| Ascomycota    | Devriesia         | 0      | 0.8887 | 0.1113 | 0        | 0.00011  | 1.38E-05    |
| Ascomycota    | Cladophialophora  | 0      | 0.8871 | 0.1129 | 0        | 0.001696 | 0.000215691 |
| Basidiomycota | Guehomyces        | 0.6191 | 0.1583 | 0.2226 | 0.007759 | 0.001983 | 0.00279022  |
| Ascomycota    | Thyrostroma       | 0      | 0.1125 | 0.8875 | 0        | 3.66E-05 | 0.000289118 |
| Ascomycota    | Engyodontium      | 0      | 0.7558 | 0.2442 | 0        | 9.94E-05 | 3.21E-05    |
| Ascomycota    | Vertexicola       | 0      | 1      | 0      | 0        | 0.000136 | 0           |
| Basidiomycota | Gymnopilus        | 0      | 0      | 1      | 0        | 0        | 0.000119319 |
| Ascomycota    | Calycina          | 0      | 0.5328 | 0.4672 | 0        | 7.33E-05 | 6.42E-05    |
| Ascomycota    | Cenococcum        | 0      | 0      | 1      | 0        | 0        | 0.004690139 |
| Basidiomycota | Typhula           | 0      | 0.3689 | 0.6311 | 0        | 0.000215 | 0.000367134 |
| Ascomycota    | Ochroconis        | 0      | 0      | 1      | 0        | 0        | 0.000119319 |
| Ascomycota    | Chaetomium        | 0.6512 | 0.2116 | 0.1372 | 0.016137 | 0.005244 | 0.00340058  |
| Basidiomycota | Clavaria          | 0      | 0      | 1      | 0        | 0        | 0.0008903   |
| Ascomycota    | Strelitziana      | 0      | 1      | 0      | 0        | 0.000335 | 0           |
| Ascomycota    | Xeromyces         | 0      | 0.1659 | 0.8341 | 0        | 0.000591 | 0.002973787 |
| Ascomycota    | Chaetomidium      | 0      | 0.4353 | 0.5647 | 0        | 0.000754 | 0.000977495 |
| Basidiomycota | Cystofilobasidium | 0      | 0.9791 | 0.0209 | 0        | 0.000215 | 4.59E-06    |
| Rotifera      | Unclassified      | 0.8993 | 0.0755 | 0.0252 | 0.011156 | 0.000937 | 0.000312064 |

|                 |                   |        |        |        |          |          |             |
|-----------------|-------------------|--------|--------|--------|----------|----------|-------------|
| Ascomycota      | Purpureocillium   | 0      | 0.8846 | 0.1154 | 0        | 0.002392 | 0.000312064 |
| Unassigned      | Unassigned        | 0.5359 | 0.4378 | 0.0263 | 0.194794 | 0.15911  | 0.009559255 |
| Ascomycota      | Botrytis          | 0      | 0.5187 | 0.4813 | 0        | 0.000361 | 0.00033501  |
| Ascomycota      | Myrmecridium      | 0.0807 | 0.8242 | 0.0951 | 0.000207 | 0.002109 | 0.000243226 |
| Basidiomycota   | Filobasidium      | 0      | 0.1068 | 0.8932 | 0        | 0.000408 | 0.003414348 |
| Ascomycota      | Ruhlandiella      | 0      | 1      | 0      | 0        | 0.000173 | 0           |
| Ascomycota      | Cladorrhinum      | 0      | 0.2954 | 0.7046 | 0        | 0.000131 | 0.000312064 |
| Ascomycota      | Magnaporthe       | 0      | 0.5446 | 0.4554 | 0        | 0.000225 | 0.000188156 |
| Basidiomycota   | Micropsalliota    | 0.9273 | 0.0701 | 0.0026 | 0.004912 | 0.000372 | 1.38E-05    |
| Basidiomycota   | Gyroporus         | 0      | 1      | 0      | 0        | 0.000147 | 0           |
| Ascomycota      | Crocicreas        | 0      | 0.9641 | 0.0359 | 0        | 0.001601 | 5.97E-05    |
| Ascomycota      | Gliocladiopsis    | 0      | 0.0623 | 0.9377 | 0        | 0.000696 | 0.010467912 |
| Ascomycota      | Saccharomycopsis  | 0      | 0.1805 | 0.8195 | 0        | 8.90E-05 | 0.000403848 |
| Ascomycota      | Paraphaeosphaeria | 0      | 1      | 0      | 0        | 0.000476 | 0           |
| Ascomycota      | Acremonium        | 0      | 0.4375 | 0.5625 | 0        | 0.000775 | 0.000995851 |
| Chytridiomycota | Spizellomyces     | 0      | 0.9143 | 0.0857 | 0        | 0.004359 | 0.000408437 |
| Ascomycota      | Codinaea          | 0      | 0.0432 | 0.9568 | 0        | 3.66E-05 | 0.000812284 |
| Ascomycota      | Gibberella        | 0.543  | 0.2118 | 0.2452 | 0.014301 | 0.005579 | 0.006456972 |
| Ascomycota      | Cladosporium      | 0.5451 | 0.1247 | 0.3302 | 0.08445  | 0.019326 | 0.051160144 |
| Basidiomycota   | Saitozyma         | 0      | 0.2637 | 0.7363 | 0        | 0.000879 | 0.00245521  |
| Ascomycota      | Pyrenochaetopsis  | 0.7908 | 0.0798 | 0.1295 | 0.007988 | 0.000806 | 0.001307915 |
| Ascomycota      | Cercospora        | 0      | 0.8168 | 0.1832 | 0        | 0.001146 | 0.000256994 |
| Ascomycota      | Zopfiella         | 0      | 0.7938 | 0.2062 | 0        | 0.000141 | 3.67E-05    |
| Ascomycota      | Paraboeremia      | 0      | 0.4632 | 0.5368 | 0        | 0.000147 | 0.0001698   |
| Ascomycota      | Leptospora        | 0      | 1      | 0      | 0        | 0.000126 | 0           |
| Ascomycota      | Kazachstania      | 0.7    | 0.1111 | 0.1889 | 0.007024 | 0.001115 | 0.00189533  |
| Ascomycota      | Phialemonium      | 0      | 0      | 1      | 0        | 0        | 0.000123908 |
| Ascomycota      | Aphanoascus       | 0      | 0.9386 | 0.0614 | 0        | 0.000351 | 2.29E-05    |
| Basidiomycota   | Cuphophyllus      | 0      | 0.0531 | 0.9469 | 0        | 1.57E-05 | 0.00027994  |

|               |                 |        |        |        |          |          |             |
|---------------|-----------------|--------|--------|--------|----------|----------|-------------|
| Ascomycota    | Diaporthe       | 0      | 0.0109 | 0.9891 | 0        | 9.94E-05 | 0.009059035 |
| Basidiomycota | Ceratobasidium  | 0.8094 | 0.1097 | 0.0809 | 0.00606  | 0.000822 | 0.000605771 |
| Basidiomycota | Disciseda       | 0      | 0      | 1      | 0        | 0        | 0.000183567 |
| Ascomycota    | Circinotrichum  | 0      | 1      | 0      | 0        | 0.000194 | 0           |
| Ascomycota    | Thermomyces     | 0.9255 | 0.043  | 0.0315 | 0.007552 | 0.000351 | 0.000256994 |
| Ascomycota    | Wickerhamomyces | 0      | 0.0081 | 0.9919 | 0        | 3.66E-05 | 0.00446068  |
| Ascomycota    | Alternaria      | 0.4659 | 0.184  | 0.3501 | 0.014393 | 0.005683 | 0.01081669  |
| Ascomycota    | Neodevriesia    | 0      | 1      | 0      | 0        | 0.000147 | 0           |
| Basidiomycota | Scleroderma     | 0      | 0.6707 | 0.3293 | 0        | 0.000523 | 0.000256994 |
| Ascomycota    | Sporothrix      | 0      | 1      | 0      | 0        | 0.000141 | 0           |
| Basidiomycota | Phlebia         | 0      | 0      | 1      | 0        | 0        | 0.000247816 |
| Ascomycota    | Coniochaeta     | 0      | 0.9625 | 0.0375 | 0        | 0.003177 | 0.000123908 |
| Ascomycota    | Dictyosporium   | 0      | 1      | 0      | 0        | 0.000141 | 0           |
| Ascomycota    | Pleurotheciella | 0      | 1      | 0      | 0        | 0.000131 | 0           |
| Ascomycota    | Podospora       | 0      | 0.9978 | 0.0022 | 0        | 0.004087 | 9.18E-06    |
| Ascomycota    | Isaria          | 0      | 1      | 0      | 0        | 0.000209 | 0           |
| Basidiomycota | Hygrophorus     | 1      | 0      | 0      | 0.008264 | 0        | 0           |
| Anthophyta    | Quercus         | 0      | 1      | 0      | 0        | 0.00461  | 0           |
| Ascomycota    | Stemphylium     | 0      | 0.8272 | 0.1728 | 0        | 0.002109 | 0.000440561 |
| Ascomycota    | Auxarthron      | 0      | 0      | 1      | 0        | 0        | 0.000123908 |
| Ascomycota    | Hymenoscyphus   | 0      | 0.0237 | 0.9763 | 0        | 2.09E-05 | 0.000862765 |
| Ascomycota    | Melanocarpus    | 0      | 0.622  | 0.378  | 0        | 0.001125 | 0.000683787 |
| Ascomycota    | Ciboria         | 0      | 1      | 0      | 0        | 0.00033  | 0           |
| Ascomycota    | Sagenomella     | 0      | 0      | 1      | 0        | 0        | 0.000142264 |
| Basidiomycota | Cystobasidium   | 0      | 1      | 0      | 0        | 0.000167 | 0           |
| Basidiomycota | Mrakiella       | 0      | 0.4963 | 0.5037 | 0        | 0.000565 | 0.000573647 |
| Ascomycota    | Oidiodendron    | 0      | 0.8308 | 0.1692 | 0        | 0.003177 | 0.000647074 |
| Ascomycota    | Mycosphaerella  | 0      | 0.5854 | 0.4146 | 0        | 0.004893 | 0.003464829 |
| Basidiomycota | Leucoagaricus   | 0      | 0.5921 | 0.4079 | 0        | 7.33E-05 | 5.05E-05    |



|               |                  |        |        |        |          |          |             |
|---------------|------------------|--------|--------|--------|----------|----------|-------------|
| Ascomycota    | Pseudopithomyces | 0      | 0.0504 | 0.9496 | 0        | 3.14E-05 | 0.000592004 |
| Ascomycota    | Conlarium        | 0      | 0      | 1      | 0        | 0        | 0.000885711 |
| Ascomycota    | Saccharomyces    | 0      | 0.5507 | 0.4493 | 0        | 0.000225 | 0.000183567 |
| Ascomycota    | Penicillium      | 0.4548 | 0.2573 | 0.2879 | 0.029635 | 0.016767 | 0.018755966 |
| Basidiomycota | Wallemia         | 0      | 0.5932 | 0.4068 | 0        | 0.001392 | 0.000954549 |
| Ascomycota    | Bipolaris        | 0      | 0.5526 | 0.4474 | 0        | 6.80E-05 | 5.51E-05    |
| Basidiomycota | Mrakia           | 0      | 0.2293 | 0.7707 | 0        | 3.14E-05 | 0.000105551 |
| Ascomycota    | Neobulgaria      | 0      | 0.3631 | 0.6369 | 0        | 0.000256 | 0.000449739 |
| Ascomycota    | Lophiostoma      | 0      | 0.8119 | 0.1881 | 0        | 0.00315  | 0.000729679 |
| Ascomycota    | Meyerozyma       | 0      | 0.1607 | 0.8393 | 0        | 0.00012  | 0.000628717 |
| Basidiomycota | Psathyrella      | 0      | 0.0386 | 0.9614 | 0        | 3.66E-05 | 0.000913246 |
| Basidiomycota | Dioszegia        | 0      | 0.0129 | 0.9871 | 0        | 5.23E-06 | 0.000399258 |
| Ascomycota    | Metarhizium      | 0      | 0.8228 | 0.1772 | 0        | 0.010252 | 0.002207394 |
| Ascomycota    | Neoascochyta     | 0      | 1      | 0      | 0        | 0.000178 | 0           |
| Ascomycota    | Scopulariopsis   | 0      | 0.6454 | 0.3546 | 0        | 0.000434 | 0.000238637 |
| Ascomycota    | Hydropisphaera   | 0      | 0.638  | 0.362  | 0        | 0.000267 | 0.000151443 |
| Ascomycota    | Millerozyma      | 0      | 0.0861 | 0.9139 | 0        | 4.71E-05 | 0.00050022  |
| Basidiomycota | Porothelium      | 0      | 0.1695 | 0.8305 | 0        | 0.000152 | 0.000743447 |
| Ascomycota    | Ilyonectria      | 0      | 0.4665 | 0.5335 | 0        | 0.002873 | 0.003285851 |
| Basidiomycota | Mycenella        | 0      | 0      | 1      | 0        | 0        | 0.000256994 |
| Ascomycota    | Pseudeurotium    | 0      | 0.5744 | 0.4256 | 0        | 0.000372 | 0.000275351 |
| Ascomycota    | Phoma            | 0      | 0.1111 | 0.8889 | 0        | 4.19E-05 | 0.00033501  |
| Ascomycota    | Microdochium     | 0      | 0.1578 | 0.8422 | 0        | 0.000183 | 0.000977495 |
| Basidiomycota | Golubevia        | 0      | 0.5144 | 0.4856 | 0        | 0.00089  | 0.000839819 |
| Basidiomycota | Lycoperdon       | 0      | 0.0952 | 0.9048 | 0        | 3.14E-05 | 0.000298296 |
| Basidiomycota | Conocybe         | 0      | 0.7385 | 0.2615 | 0        | 0.003564 | 0.001262024 |
| Ascomycota    | Podosphaera      | 0      | 0.192  | 0.808  | 0        | 2.62E-05 | 0.00011014  |
| Basidiomycota | Lindtneria       | 0      | 0.9939 | 0.0061 | 0        | 0.018714 | 0.000114729 |
| Ascomycota    | Sphaerosporella  | 0      | 0.3956 | 0.6044 | 0        | 0.000874 | 0.00133545  |

|                 |                    |        |        |        |          |          |             |
|-----------------|--------------------|--------|--------|--------|----------|----------|-------------|
| Ascomycota      | Toxicocladosporium | 0      | 0.0252 | 0.9748 | 0        | 8.37E-05 | 0.00323537  |
| Cercozoa        | Unclassified       | 0.3603 | 0.2206 | 0.4191 | 0.008608 | 0.00527  | 0.010013584 |
| Ascomycota      | Marssonina         | 0.9137 | 0      | 0.0863 | 0.000826 | 0        | 7.80E-05    |
| Ascomycota      | Mycocentrospora    | 0      | 0.3932 | 0.6068 | 0        | 0.000262 | 0.000403848 |
| Basidiomycota   | Unclassified       | 0.2338 | 0.5727 | 0.1935 | 0.016987 | 0.041604 | 0.014056649 |
| Ascomycota      | Cordyceps          | 0      | 0.8859 | 0.1141 | 0        | 0.002957 | 0.000380902 |
| Ascomycota      | Hirsutella         | 0      | 0.2648 | 0.7352 | 0        | 3.14E-05 | 8.72E-05    |
| Ascomycota      | Chaetosphaeria     | 0      | 0.6017 | 0.3983 | 0        | 0.000277 | 0.000183567 |
| Ascomycota      | Ophiocordyceps     | 0      | 0.0301 | 0.9699 | 0        | 2.62E-05 | 0.000844409 |
| Ascomycota      | Talaromyces        | 0      | 0.2857 | 0.7143 | 0        | 0.001512 | 0.003781482 |
| Ascomycota      | Pyrenochaeta       | 0      | 0      | 1      | 0        | 0        | 0.000133086 |
| Ascomycota      | Ascobolus          | 0      | 0.4029 | 0.5971 | 0        | 0.000152 | 0.00022487  |
| Chytridiomycota | Rhizophlyctis      | 0      | 0.3334 | 0.6666 | 0        | 0.000131 | 0.000261583 |
| Glomeromycota   | Glomus             | 0.9927 | 0.0047 | 0.0026 | 0.008792 | 4.19E-05 | 2.29E-05    |
| Glomeromycota   | Unclassified       | 0      | 0.2521 | 0.7479 | 0        | 0.000382 | 0.001133527 |
| Ascomycota      | Phaeoisaria        | 0      | 0.5515 | 0.4485 | 0        | 0.000288 | 0.000234048 |
| Ascomycota      | Chloridium         | 0      | 0.866  | 0.134  | 0        | 0.001068 | 0.00016521  |
| Ascomycota      | Geoglossum         | 0      | 0      | 1      | 0        | 0        | 0.000440561 |
| Ascomycota      | Helicoma           | 0      | 1      | 0      | 0        | 0.000136 | 0           |
| Ascomycota      | Coniosporium       | 0      | 0.0972 | 0.9028 | 0        | 0.000115 | 0.001069278 |
| Ascomycota      | Phaeobotryon       | 0      | 0      | 1      | 0        | 0        | 0.000137675 |
| Basidiomycota   | Tubaria            | 0      | 0.1445 | 0.8555 | 0        | 2.09E-05 | 0.000123908 |
| Basidiomycota   | Thelephora         | 0      | 0      | 1      | 0        | 0        | 0.000302886 |
| Ascomycota      | Pseudocoleophoma   | 0      | 0      | 1      | 0        | 0        | 0.00122531  |
| Ascomycota      | Exserohilum        | 0      | 0.3507 | 0.6493 | 0        | 4.71E-05 | 8.72E-05    |
| Ascomycota      | Stachybotrys       | 0      | 0.7996 | 0.2004 | 0        | 0.00011  | 2.75E-05    |
| Ascomycota      | Subramaniula       | 0      | 0      | 1      | 0        | 0        | 0.000137675 |
| Basidiomycota   | Malassezia         | 0.2487 | 0.2084 | 0.543  | 0.007644 | 0.006405 | 0.016690836 |
| Ascomycota      | Chaetosphaeronema  | 0      | 0.3423 | 0.6577 | 0        | 0.000246 | 0.000472685 |

|                 |                    |        |        |        |          |          |             |
|-----------------|--------------------|--------|--------|--------|----------|----------|-------------|
| Ascomycota      | Kernia             | 0      | 0.8281 | 0.1719 | 0        | 0.001371 | 0.000284529 |
| Ascomycota      | Harposporium       | 0      | 1      | 0      | 0        | 0.000194 | 0           |
| Ascomycota      | Zasmidium          | 0      | 0.0196 | 0.9804 | 0        | 5.23E-06 | 0.000261583 |
| Ascomycota      | Candida            | 0.7998 | 0.0454 | 0.1548 | 0.042329 | 0.002402 | 0.008191681 |
| Ascomycota      | Phyllosticta       | 0      | 0.0232 | 0.9768 | 0        | 4.71E-05 | 0.001982524 |
| Ascomycota      | Fusidium           | 0      | 1      | 0      | 0        | 0.000147 | 0           |
| Glomeromycota   | Rhizophagus        | 0      | 0.6211 | 0.3789 | 0        | 0.004731 | 0.002886592 |
| Basidiomycota   | Panaeolus          | 0      | 0      | 1      | 0        | 0        | 0.000692966 |
| Ascomycota      | Minimelanolocus    | 0.1906 | 0.8094 | 0      | 0.001813 | 0.007703 | 0           |
| Basidiomycota   | Coprinus           | 0      | 0.4776 | 0.5224 | 0        | 0.000529 | 0.000578236 |
| Ascomycota      | Hawksworthiomyces  | 0      | 0.0614 | 0.9386 | 0        | 4.71E-05 | 0.000720501 |
| Ascomycota      | Tolypocladium      | 0      | 0.4689 | 0.5311 | 0        | 0.000126 | 0.000142264 |
| Aphelidiomycota | Unclassified       | 0      | 0.5635 | 0.4365 | 0        | 0.000539 | 0.000417615 |
| Ascomycota      | Periconia          | 0      | 0.1125 | 0.8875 | 0        | 1.57E-05 | 0.000123908 |
| Ascomycota      | Trichaleurina      | 0      | 0      | 1      | 0        | 0        | 0.000481864 |
| Ascomycota      | Latorua            | 0      | 0.4246 | 0.5754 | 0        | 0.000115 | 0.000156032 |
| Ascomycota      | Humicola           | 0.0028 | 0.6393 | 0.3579 | 2.30E-05 | 0.005238 | 0.002932484 |
| Ascomycota      | Mycoleptodiscus    | 0      | 0      | 1      | 0        | 0        | 0.000174389 |
| Basidiomycota   | Pleurotus          | 0      | 0      | 1      | 0        | 0        | 0.000174389 |
| Ascomycota      | Remersonia         | 0      | 0      | 1      | 0        | 0        | 0.000321242 |
| Basidiomycota   | Cortinarius        | 0.9928 | 0      | 0.0072 | 0.018433 | 0        | 0.000133086 |
| Basidiomycota   | Rhodosporidiobolus | 0      | 1      | 0      | 0        | 0.000178 | 0           |
| Basidiomycota   | Coprinopsis        | 0      | 0.2662 | 0.7338 | 0        | 0.00011  | 0.000302886 |
| Ascomycota      | Unclassified       | 0.22   | 0.3448 | 0.4352 | 0.119158 | 0.186757 | 0.235723071 |
| Basidiomycota   | Sporobolomyces     | 0      | 0.7001 | 0.2999 | 0        | 0.000225 | 9.64E-05    |
| Basidiomycota   | Piloderma          | 0      | 1      | 0      | 0        | 0.000183 | 0           |
| Ascomycota      | Trichoderma        | 0.3029 | 0.2677 | 0.4294 | 0.004293 | 0.003794 | 0.006085249 |
| Ascomycota      | Cadophora          | 0.9796 | 0.0171 | 0.0033 | 0.005394 | 9.42E-05 | 1.84E-05    |
| Ascomycota      | Thielavia          | 0.0045 | 0.4253 | 0.5702 | 2.30E-05 | 0.002167 | 0.002904949 |

|               |                     |        |        |        |          |          |             |
|---------------|---------------------|--------|--------|--------|----------|----------|-------------|
| Basidiomycota | Mycena              | 0      | 1      | 0      | 0        | 0.000131 | 0           |
| Olpidiomycota | Olpidium            | 0      | 0.9253 | 0.0747 | 0        | 0.001648 | 0.000133086 |
| Ascomycota    | Acrostalagmus       | 0      | 0.6876 | 0.3124 | 0        | 0.000434 | 0.000197335 |
| Ascomycota    | Pichia              | 0      | 0.3913 | 0.6087 | 0        | 0.000162 | 0.000252405 |
| Unclassified  | Unclassified        | 0.2623 | 0.422  | 0.3157 | 0.086975 | 0.139946 | 0.104702071 |
| Basidiomycota | Fomitopsis          | 0      | 0      | 1      | 0        | 0        | 0.000573647 |
| Rozellomycota | Unclassified        | 0      | 0.1183 | 0.8817 | 0        | 0.000136 | 0.001014208 |
| Ascomycota    | Beauveria           | 0      | 0.3195 | 0.6805 | 0        | 7.33E-05 | 0.000156032 |
| Ascomycota    | Stagonosporopsis    | 0      | 0.1066 | 0.8934 | 0        | 9.42E-05 | 0.000789338 |
| Basidiomycota | Cutaneotrichosporon | 0      | 0.6038 | 0.3962 | 0        | 0.003637 | 0.002386372 |
| Basidiomycota | Lepiota             | 0      | 0.1703 | 0.8297 | 0        | 4.71E-05 | 0.000229459 |
| Basidiomycota | Trichosporon        | 0      | 0.2715 | 0.7285 | 0        | 0.000523 | 0.001404288 |
| Mucoromycota  | Rhizomucor          | 0      | 0      | 1      | 0        | 0        | 0.000862765 |
| Basidiomycota | Phallus             | 0      | 0.9985 | 0.0015 | 0        | 0.003077 | 4.59E-06    |
| Ascomycota    | Acaulium            | 0      | 1      | 0      | 0        | 0.000351 | 0           |
| Ascomycota    | Simplicillium       | 0      | 1      | 0      | 0        | 0.00707  | 0           |
| Ascomycota    | Gliomastix          | 0      | 0.4029 | 0.5971 | 0        | 0.000152 | 0.00022487  |
| Mucoromycota  | Umbelopsis          | 0      | 1      | 0      | 0        | 0.000194 | 0           |
| Basidiomycota | Peniophorella       | 0      | 0      | 1      | 0        | 0        | 0.000229459 |
| Basidiomycota | Symmetrospora       | 0      | 0      | 1      | 0        | 0        | 0.000146854 |
| Ascomycota    | Myceliophthora      | 0      | 0.2587 | 0.7413 | 0        | 0.000607 | 0.001739298 |
| Ascomycota    | Archaeorhizomyces   | 0      | 0.4483 | 0.5517 | 0        | 0.001272 | 0.001564909 |
| Ascomycota    | Curvularia          | 0.8985 | 0.0422 | 0.0593 | 0.007024 | 0.00033  | 0.000463507 |
| Ascomycota    | Pseudocercospora    | 0      | 0.0158 | 0.9842 | 0        | 0.000298 | 0.018531096 |
| Ascomycota    | Uwebraunia          | 0      | 0      | 1      | 0        | 0        | 0.00011014  |
| Ascomycota    | Knufia              | 0      | 0.7156 | 0.2844 | 0        | 0.00201  | 0.000798517 |
| Ascomycota    | Fusicolla           | 0      | 0.6072 | 0.3928 | 0        | 0.000319 | 0.000206513 |
| Basidiomycota | Gymnopus            | 0      | 0      | 1      | 0        | 0        | 0.000137675 |
| Basidiomycota | Hygrocybe           | 0      | 0.0469 | 0.9531 | 0        | 0.000377 | 0.007650158 |

|                 |                  |        |        |        |          |          |             |
|-----------------|------------------|--------|--------|--------|----------|----------|-------------|
| Ascomycota      | Leptosphaeria    | 0      | 0.7222 | 0.2778 | 0        | 0.000298 | 0.000114729 |
| Basidiomycota   | Apiotrichum      | 0      | 0.9155 | 0.0845 | 0        | 0.000199 | 1.84E-05    |
| Ascomycota      | Leohumicola      | 0      | 0.192  | 0.808  | 0        | 2.62E-05 | 0.00011014  |
| Basidiomycota   | Papiliotrema     | 0      | 0.5533 | 0.4467 | 0        | 0.00033  | 0.000266172 |
| Ascomycota      | Cephalotrichum   | 0      | 0.8009 | 0.1991 | 0        | 0.000665 | 0.00016521  |
| Basidiomycota   | Sterigmatomyces  | 0.7757 | 0.0262 | 0.1981 | 0.004798 | 0.000162 | 0.00122531  |
| Basidiomycota   | Subulicystidium  | 0      | 0.849  | 0.151  | 0        | 0.004956 | 0.000881122 |
| Ascomycota      | Acephala         | 0      | 0.0678 | 0.9322 | 0        | 4.71E-05 | 0.000647074 |
| Chytridiomycota | Rhizophydium     | 0      | 0.8022 | 0.1978 | 0        | 0.000167 | 4.13E-05    |
| Ascomycota      | Fusarium         | 0.3102 | 0.0564 | 0.6334 | 0.033652 | 0.006123 | 0.068722924 |
| Ascomycota      | Monascus         | 0      | 0      | 1      | 0        | 0        | 0.000573647 |
| Ascomycota      | Preussia         | 0      | 0.8793 | 0.1207 | 0        | 0.002407 | 0.000330421 |
| Chytridiomycota | Powellomyces     | 0      | 0.0646 | 0.9354 | 0        | 1.05E-05 | 0.000151443 |
| Ascomycota      | Lasiodiplodia    | 0      | 0.0181 | 0.9819 | 0        | 0.000251 | 0.013597731 |
| Ascomycota      | Nigrospora       | 0.8885 | 0.0343 | 0.0772 | 0.008401 | 0.000324 | 0.000729679 |
| Mucoromycota    | Rhizopus         | 0      | 1      | 0      | 0        | 0.000136 | 0           |
| Ascomycota      | Schwanniomyces   | 0.9754 | 0      | 0.0246 | 0.004912 | 0        | 0.000123908 |
| Ascomycota      | Geomyces         | 0.7911 | 0.1256 | 0.0832 | 0.007414 | 0.001177 | 0.00078016  |
| Ascomycota      | Scytalidium      | 0.9437 | 0.0563 | 0      | 0.008424 | 0.000502 | 0           |
| Ascomycota      | Pseudallescheria | 0      | 1      | 0      | 0        | 0.000283 | 0           |
| Ascomycota      | Sphaerulina      | 0      | 0      | 1      | 0        | 0        | 0.002716793 |
| Ascomycota      | Zymoseptoria     | 1      | 0      | 0      | 0.008769 | 0        | 0           |
| Ascomycota      | Dimorphospora    | 0.9772 | 0      | 0.0228 | 0.007093 | 0        | 0.00016521  |
| Ascomycota      | Peziza           | 0      | 0      | 1      | 0        | 0        | 0.000458918 |
| Ascomycota      | Neocamarosporium | 0      | 1      | 0      | 0        | 0.000199 | 0           |
| Ascomycota      | Nadsonia         | 0      | 0.0138 | 0.9862 | 0        | 1.57E-05 | 0.001119759 |
| Ascomycota      | Schizothecium    | 0      | 0.0429 | 0.9571 | 0        | 6.28E-05 | 0.001399699 |
| Ascomycota      | Pithoascus       | 0      | 0      | 1      | 0        | 0        | 0.000706733 |
| Ascomycota      | Tetracladium     | 0      | 0.3172 | 0.6828 | 0        | 0.001094 | 0.002354248 |

|               |                   |        |        |        |          |          |             |
|---------------|-------------------|--------|--------|--------|----------|----------|-------------|
| Ascomycota    | Dendrosporium     | 0      | 0.3195 | 0.6805 | 0        | 0.00011  | 0.000234048 |
| Basidiomycota | Camarophylloopsis | 0      | 0.1597 | 0.8403 | 0        | 3.14E-05 | 0.00016521  |
| Basidiomycota | Hannaella         | 0      | 0.0614 | 0.9386 | 0        | 0.000141 | 0.002161502 |
| Glomeromycota | Diversispora      | 1      | 0      | 0      | 0.007093 | 0        | 0           |
| Ascomycota    | Dichotomopilus    | 0      | 1      | 0      | 0        | 0.000612 | 0           |
| Ascomycota    | Microascus        | 0      | 0.0061 | 0.9939 | 0        | 5.23E-06 | 0.000858176 |
| Ascomycota    | Gamsia            | 0      | 0      | 1      | 0        | 0        | 0.000114729 |
| Ascomycota    | Poaceascoma       | 0      | 1      | 0      | 0        | 0.000733 | 0           |
| Ascomycota    | Gaeumannomyces    | 0.256  | 0.744  | 0      | 9.18E-05 | 0.000267 | 0           |
| Basidiomycota | Tulostoma         | 0      | 0      | 1      | 0        | 0        | 0.000417615 |
| Ascomycota    | Plectosphaerella  | 0.3299 | 0.2959 | 0.3742 | 0.008287 | 0.007431 | 0.009398634 |
| Ascomycota    | Teichospora       | 0      | 0      | 1      | 0        | 0        | 0.000380902 |
| Ascomycota    | Zygosaccharomyces | 0      | 0.1283 | 0.8717 | 0        | 2.09E-05 | 0.000142264 |
| Ascomycota    | Wardomyces        | 0      | 0      | 1      | 0        | 0        | 0.00033501  |
| Ascomycota    | Darksidea         | 0      | 0.5804 | 0.4196 | 0        | 0.000298 | 0.000215691 |
| Ascomycota    | Aureobasidium     | 0      | 0.443  | 0.557  | 0        | 0.002413 | 0.003033446 |
| Ascomycota    | Apodus            | 0      | 0.2572 | 0.7428 | 0        | 8.90E-05 | 0.000256994 |

**Supplemental Table S10** Ternary diagram, F1, F2 and F3 groups in the fungal phylum level.

| Phylum          | Genus           | J1 ratio | J2 ratio | J3 ratio | J1 reabundance | J2 reabundance | J3 reabundance |
|-----------------|-----------------|----------|----------|----------|----------------|----------------|----------------|
| Basidiomycota   | Clavulina       | 0        | 0        | 1        | 0              | 0              | 0.000722192    |
| Ascomycota      | Lulwoana        | 0.2711   | 0.1716   | 0.5572   | 0.000375       | 0.000238       | 0.000771432    |
| Ascomycota      | Dekkera         | 0        | 0.9902   | 0.0098   | 0              | 0.003307       | 3.28E-05       |
| Ascomycota      | Stilbella       | 0.4057   | 0.5823   | 0.012    | 0.001669       | 0.002396       | 4.92E-05       |
| Ascomycota      | Aspergillus     | 0.4554   | 0.0604   | 0.4842   | 0.043184       | 0.005722       | 0.045913873    |
| Ascomycota      | Debaryomyces    | 0.2217   | 0        | 0.7783   | 6.39E-05       | 0              | 0.000224317    |
| Ascomycota      | Arthrographis   | 1        | 0        | 0        | 0.000335       | 0              | 0              |
| Chytridiomycota | Unclassified    | 0.5066   | 0.3186   | 0.1748   | 0.004409       | 0.002772       | 0.001520979    |
| Ascomycota      | Graphium        | 0        | 0        | 1        | 0              | 0              | 0.000164134    |
| Basidiomycota   | Rhodotorula     | 0.0174   | 0.0006   | 0.982    | 0.001869       | 5.94E-05       | 0.105467318    |
| Ascomycota      | Pochonia        | 0.7896   | 0        | 0.2104   | 0.000288       | 0              | 7.66E-05       |
| Ascomycota      | Didymella       | 0.1642   | 0.6228   | 0.2131   | 0.002268       | 0.008603       | 0.002943478    |
| Ascomycota      | Cyphellophora   | 0.7785   | 0.2105   | 0.011    | 0.001941       | 0.000525       | 2.74E-05       |
| Ascomycota      | Clonostachys    | 0.2043   | 0.562    | 0.2337   | 0.000727       | 0.002          | 0.000831614    |
| Ascomycota      | Epicoccum       | 0.2501   | 0.2525   | 0.4974   | 0.00099        | 0.001          | 0.001969613    |
| Ascomycota      | Paraphoma       | 0.6327   | 0.2783   | 0.089    | 0.00385        | 0.001693       | 0.000541644    |
| Ascomycota      | Trichocladium   | 0.1676   | 0        | 0.8324   | 3.19E-05       | 0              | 0.000158663    |
| Ascomycota      | Articulospora   | 0.2821   | 0        | 0.7179   | 5.59E-05       | 0              | 0.00014225     |
| Ascomycota      | Mycothermus     | 0.0324   | 0        | 0.9676   | 7.99E-05       | 0              | 0.00238542     |
| Ascomycota      | Volutella       | 0.2263   | 0.6897   | 0.084    | 0.000192       | 0.000584       | 7.11E-05       |
| Basidiomycota   | Cyathus         | 0        | 1        | 0        | 0              | 0.001812       | 0              |
| Basidiomycota   | Coprinellus     | 0.7707   | 0        | 0.2293   | 0.000791       | 0              | 0.000235259    |
| Basidiomycota   | Russula         | 0.0011   | 0.0959   | 0.903    | 7.99E-06       | 0.000693       | 0.006527079    |
| Ascomycota      | Lectera         | 0.0643   | 0.0744   | 0.8613   | 0.000359       | 0.000416       | 0.00481461     |
| Ascomycota      | Staphylotrichum | 0.1756   | 0.7995   | 0.025    | 0.00254        | 0.011564       | 0.000361096    |
| Ascomycota      | Sarocladium     | 0.3757   | 0.3123   | 0.3119   | 0.002037       | 0.001693       | 0.001690585    |
| Ascomycota      | Chrysosporium   | 0        | 0        | 1        | 0              | 0              | 0.000196961    |

|                   |                         |        |        |        |          |          |             |
|-------------------|-------------------------|--------|--------|--------|----------|----------|-------------|
| Basidiomycota     | Aporpium                | 0      | 0      | 1      | 0        | 0        | 0.000131308 |
| Basidiomycota     | Erythrobasidium         | 0.5574 | 0.0845 | 0.3581 | 0.004377 | 0.000663 | 0.00281217  |
| Basidiomycota     | Entoloma                | 0.7449 | 0      | 0.2551 | 0.000511 | 0        | 0.000175077 |
| Glomeromycota     | Funneliformis           | 0.5211 | 0      | 0.4789 | 0.000327 | 0        | 0.000300913 |
| Ascomycota        | Minutisphaera           | 0.198  | 0      | 0.802  | 0.000184 | 0        | 0.000744076 |
| Mortierellomycota | Unclassified            | 0.1614 | 0.697  | 0.1416 | 0.000511 | 0.002208 | 0.000448634 |
| Ascomycota        | Pseudochaetosphaeronema | 0      | 0      | 1      | 0        | 0        | 0.000738605 |
| Ascomycota        | Verticillium            | 0.4681 | 0.2924 | 0.2395 | 0.011477 | 0.007168 | 0.005870542 |
| Mortierellomycota | Mortierella             | 0.7808 | 0.1082 | 0.111  | 0.133066 | 0.018444 | 0.018919229 |
| Basidiomycota     | Tomentella              | 0.1818 | 0      | 0.8182 | 0.000463 | 0        | 0.002084507 |
| Ascomycota        | Myrothecium             | 0.2481 | 0      | 0.7519 | 0.001509 | 0        | 0.00457388  |
| Ascomycota        | Hyaloseta               | 0.4988 | 0      | 0.5012 | 0.00012  | 0        | 0.000120365 |
| Ascomycota        | Daldinia                | 1      | 0      | 0      | 0.000264 | 0        | 0           |
| Basidiomycota     | Solicoccozyma           | 0.214  | 0.0021 | 0.7839 | 0.00099  | 9.90E-06 | 0.003627371 |
| Basidiomycota     | Craterellus             | 0.1831 | 0.0084 | 0.8085 | 0.000216 | 9.90E-06 | 0.00095198  |
| Ascomycota        | Malbranchea             | 0.5988 | 0      | 0.4012 | 0.000367 | 0        | 0.000246202 |
| Basidiomycota     | Vishniacozyma           | 0.0882 | 0.4245 | 0.4874 | 0.000687 | 0.003307 | 0.003796977 |
| Ascomycota        | Taphrina                | 1      | 0      | 0      | 0.000311 | 0        | 0           |
| Ascomycota        | Savoryella              | 0.9156 | 0      | 0.0844 | 0.000415 | 0        | 3.83E-05    |
| Basidiomycota     | Melanophyllum           | 0.9915 | 0.0085 | 0      | 0.053287 | 0.000455 | 0           |
| Basidiomycota     | Auricularia             | 0.0805 | 0      | 0.9195 | 7.19E-05 | 0        | 0.000820672 |
| Basidiomycota     | Schizophyllum           | 0.4752 | 0.4778 | 0.047  | 0.000719 | 0.000723 | 7.11E-05    |
| Ascomycota        | Robillarda              | 0      | 0      | 1      | 0        | 0        | 0.000213375 |
| Ascomycota        | Trichothecium           | 0.1152 | 0.8175 | 0.0673 | 0.000431 | 0.003059 | 0.000251673 |
| Basidiomycota     | Leucosporidium          | 0      | 1      | 0      | 0        | 0.000455 | 0           |
| Ascomycota        | Colletotrichum          | 0.0643 | 0.0712 | 0.8645 | 0.002156 | 0.002386 | 0.028969728 |
| Basidiomycota     | Sebacina                | 0.7869 | 0      | 0.2131 | 0.000343 | 0        | 9.30E-05    |
| Ascomycota        | Lecanicillium           | 0.9714 | 0      | 0.0286 | 0.001486 | 0        | 4.38E-05    |
| Basidiomycota     | Flammulina              | 0.242  | 0      | 0.758  | 0.000224 | 0        | 0.000700307 |



|               |                   |        |        |        |          |          |             |
|---------------|-------------------|--------|--------|--------|----------|----------|-------------|
| Basidiomycota | Gliophorus        | 0.395  | 0      | 0.605  | 0.003083 | 0        | 0.004721601 |
| Ascomycota    | Ustilaginoidea    | 0.7187 | 0      | 0.2813 | 0.000168 | 0        | 6.57E-05    |
| Ascomycota    | Exophiala         | 0.5783 | 0.2206 | 0.2011 | 0.002596 | 0.00099  | 0.000902739 |
| Ascomycota    | Capronia          | 1      | 0      | 0      | 0.000591 | 0        | 0           |
| Ascomycota    | Beltrania         | 1      | 0      | 0      | 0.000224 | 0        | 0           |
| Basidiomycota | Grammothele       | 1      | 0      | 0      | 0.000335 | 0        | 0           |
| Basidiomycota | Naganishia        | 0.4807 | 0.3311 | 0.1882 | 0.000503 | 0.000347 | 0.000196961 |
| Ascomycota    | Wallrothiella     | 0.5873 | 0      | 0.4127 | 0.000311 | 0        | 0.000218846 |
| Ascomycota    | Aporospora        | 0      | 0      | 1      | 0        | 0        | 0.000711249 |
| Ascomycota    | Rhinocladiella    | 0.2784 | 0.063  | 0.6586 | 0.001182 | 0.000267 | 0.002795757 |
| Ascomycota    | Trichoglossum     | 0.8599 | 0      | 0.1401 | 0.002452 | 0        | 0.000399394 |
| Ascomycota    | Devriesia         | 1      | 0      | 0      | 0.000192 | 0        | 0           |
| Ascomycota    | Cladophialophora  | 0.7904 | 0.1409 | 0.0686 | 0.002332 | 0.000416 | 0.000202432 |
| Basidiomycota | Guehomyces        | 0.3603 | 0.3214 | 0.3183 | 0.00262  | 0.002336 | 0.002314296 |
| Ascomycota    | Thyrostroma       | 0.9293 | 0      | 0.0707 | 0.000503 | 0        | 3.83E-05    |
| Ascomycota    | Engyodontium      | 0.3497 | 0      | 0.6503 | 5.59E-05 | 0        | 0.000103952 |
| Ascomycota    | Vertexicola       | 0      | 0      | 1      | 0        | 0        | 0.00014225  |
| Basidiomycota | Gymnopilus        | 1      | 0      | 0      | 0.000208 | 0        | 0           |
| Ascomycota    | Calycina          | 0.5935 | 0      | 0.4065 | 0.000112 | 0        | 7.66E-05    |
| Ascomycota    | Cenococcum        | 0.01   | 0      | 0.99   | 5.59E-05 | 0        | 0.005553215 |
| Basidiomycota | Typhula           | 0.7401 | 0      | 0.2599 | 0.000639 | 0        | 0.000224317 |
| Ascomycota    | Ochroconis        | 0      | 1      | 0      | 0        | 0.000257 | 0           |
| Ascomycota    | Chaetomium        | 0.7283 | 0.0008 | 0.2709 | 0.009017 | 9.90E-06 | 0.003353814 |
| Basidiomycota | Clavaria          | 0.1505 | 0      | 0.8495 | 0.000168 | 0        | 0.000946509 |
| Ascomycota    | Strelitziana      | 1      | 0      | 0      | 0.000511 | 0        | 0           |
| Ascomycota    | Xeromyces         | 0.4166 | 0      | 0.5834 | 0.001997 | 0        | 0.002795757 |
| Ascomycota    | Chaetomidium      | 0.6823 | 0.004  | 0.3138 | 0.001701 | 9.90E-06 | 0.000782374 |
| Basidiomycota | Cystofilobasidium | 0.0344 | 0      | 0.9656 | 7.99E-06 | 0        | 0.000224317 |
| Rotifera      | Unclassified      | 0.1237 | 0.6383 | 0.2379 | 0.000248 | 0.001277 | 0.00047599  |

|                 |                   |        |        |        |          |          |             |
|-----------------|-------------------|--------|--------|--------|----------|----------|-------------|
| Ascomycota      | Purpureocillium   | 0.407  | 0.5199 | 0.0731 | 0.001829 | 0.002336 | 0.000328269 |
| Unassigned      | Unassigned        | 0.0253 | 0.9482 | 0.0265 | 0.007915 | 0.296804 | 0.008299731 |
| Ascomycota      | Botrytis          | 0.4961 | 0.2516 | 0.2523 | 0.000527 | 0.000267 | 0.000268086 |
| Ascomycota      | Myrmecridium      | 0.1053 | 0.7999 | 0.0948 | 0.000431 | 0.003277 | 0.000388452 |
| Basidiomycota   | Filobasidium      | 0.1233 | 0.1838 | 0.6929 | 0.000631 | 0.000941 | 0.003545304 |
| Ascomycota      | Ruhlandiella      | 1      | 0      | 0      | 0.000264 | 0        | 0           |
| Ascomycota      | Cladorrhinum      | 0.7988 | 0      | 0.2012 | 0.000543 | 0        | 0.000136779 |
| Ascomycota      | Magnaporthe       | 0.5819 | 0      | 0.4181 | 0.000327 | 0        | 0.000235259 |
| Basidiomycota   | Micropsalliota    | 0.0581 | 0      | 0.9419 | 2.40E-05 | 0        | 0.000388452 |
| Basidiomycota   | Gyroporus         | 0      | 0      | 1      | 0        | 0        | 0.000153192 |
| Ascomycota      | Crocicreas        | 0.0331 | 0.9669 | 0      | 0.000104 | 0.00303  | 0           |
| Ascomycota      | Gliocladiopsis    | 0.1218 | 0.065  | 0.8132 | 0.001725 | 0.000921 | 0.011516766 |
| Ascomycota      | Saccharomycopsis  | 0.8831 | 0      | 0.1169 | 0.000703 | 0        | 9.30E-05    |
| Ascomycota      | Paraphaeosphaeria | 1      | 0      | 0      | 0.000727 | 0        | 0           |
| Ascomycota      | Acremonium        | 0.808  | 0      | 0.192  | 0.002164 | 0        | 0.000514288 |
| Chytridiomycota | Spizellomyces     | 0.1364 | 0.8636 | 0      | 0.001206 | 0.007633 | 0           |
| Ascomycota      | Codinaea          | 0.1294 | 0      | 0.8706 | 0.000136 | 0        | 0.000913682 |
| Ascomycota      | Gibberella        | 0.5168 | 0.0355 | 0.4477 | 0.008514 | 0.000584 | 0.007375107 |
| Ascomycota      | Cladosporium      | 0.314  | 0.3975 | 0.2885 | 0.035253 | 0.044621 | 0.032389196 |
| Basidiomycota   | Saitozyma         | 0.2275 | 0      | 0.7725 | 0.000942 | 0        | 0.003200622 |
| Ascomycota      | Pyrenochaetopsis  | 0.3385 | 0.3239 | 0.3376 | 0.001086 | 0.00104  | 0.001083287 |
| Ascomycota      | Cercospora        | 0.9127 | 0.0047 | 0.0827 | 0.001933 | 9.90E-06 | 0.000175077 |
| Ascomycota      | Zopfiella         | 0.2618 | 0.0464 | 0.6918 | 5.59E-05 | 9.90E-06 | 0.000147721 |
| Ascomycota      | Paraboeremia      | 0.9123 | 0      | 0.0877 | 0.000455 | 0        | 4.38E-05    |
| Ascomycota      | Leptospora        | 0      | 0      | 1      | 0        | 0        | 0.000131308 |
| Ascomycota      | Kazachstania      | 0.341  | 0.3852 | 0.2738 | 0.001621 | 0.001832 | 0.001302133 |
| Ascomycota      | Phialemonium      | 1      | 0      | 0      | 0.000216 | 0        | 0           |
| Ascomycota      | Aphanoascus       | 0.5387 | 0      | 0.4613 | 0.000256 | 0        | 0.000218846 |
| Basidiomycota   | Cuphophyllus      | 0.5629 | 0      | 0.4371 | 0.00024  | 0        | 0.000186019 |

|               |                  |        |        |        |          |          |             |
|---------------|------------------|--------|--------|--------|----------|----------|-------------|
| Ascomycota    | Diaporthe        | 0.0189 | 0      | 0.9811 | 0.000208 | 0        | 0.010761748 |
| Basidiomycota | Ceratobasidium   | 0.4134 | 0.1507 | 0.4359 | 0.000815 | 0.000297 | 0.00085897  |
| Basidiomycota | Disciseda        | 1      | 0      | 0      | 0.000319 | 0        | 0           |
| Ascomycota    | Circinotrichum   | 1      | 0      | 0      | 0.000296 | 0        | 0           |
| Ascomycota    | Thermomyces      | 0.9545 | 0      | 0.0455 | 0.000918 | 0        | 4.38E-05    |
| Ascomycota    | Wickerhamomyces  | 0.1824 | 0.0964 | 0.7212 | 0.001086 | 0.000574 | 0.004294851 |
| Ascomycota    | Alternaria       | 0.1909 | 0.4959 | 0.3132 | 0.005008 | 0.013009 | 0.008217664 |
| Ascomycota    | Neodevriesia     | 1      | 0      | 0      | 0.000224 | 0        | 0           |
| Basidiomycota | Scleroderma      | 0.0052 | 0.9948 | 0      | 7.99E-06 | 0.001535 | 0           |
| Ascomycota    | Sporothrix       | 1      | 0      | 0      | 0.000216 | 0        | 0           |
| Basidiomycota | Phlebia          | 0      | 1      | 0      | 0        | 0.000535 | 0           |
| Ascomycota    | Coniochaeta      | 0.0698 | 0.8581 | 0.0722 | 0.000407 | 0.00501  | 0.000421278 |
| Ascomycota    | Dictyosporium    | 1      | 0      | 0      | 0.000216 | 0        | 0           |
| Ascomycota    | Pleurotheciella  | 1      | 0      | 0      | 0.0002   | 0        | 0           |
| Ascomycota    | Podospora        | 0.86   | 0.0034 | 0.1366 | 0.005064 | 1.98E-05 | 0.000804259 |
| Ascomycota    | Isaria           | 1      | 0      | 0      | 0.000319 | 0        | 0           |
| Anthophyta    | Quercus          | 0      | 0      | 1      | 0        | 0        | 0.004820081 |
| Ascomycota    | Stemphylium      | 0.258  | 0      | 0.742  | 0.000767 | 0        | 0.002204873 |
| Ascomycota    | Auxarthron       | 1      | 0      | 0      | 0.000216 | 0        | 0           |
| Ascomycota    | Hymenoscyphus    | 0.1172 | 0      | 0.8828 | 0.000128 | 0        | 0.000962922 |
| Ascomycota    | Melanocarpus     | 0.0966 | 0.6294 | 0.2741 | 0.00028  | 0.001822 | 0.000793316 |
| Ascomycota    | Ciboria          | 0      | 0      | 1      | 0        | 0        | 0.000344682 |
| Ascomycota    | Sagenomella      | 0      | 1      | 0      | 0        | 0.000307 | 0           |
| Basidiomycota | Cystobasidium    | 0      | 0      | 1      | 0        | 0        | 0.000175077 |
| Basidiomycota | Mrakiella        | 0.6282 | 0      | 0.3718 | 0.000998 | 0        | 0.000590884 |
| Ascomycota    | Oidiodendron     | 0.1812 | 0.7333 | 0.0855 | 0.001206 | 0.004881 | 0.000568999 |
| Ascomycota    | Mycosphaerella   | 0.1625 | 0.5343 | 0.3032 | 0.002116 | 0.00696  | 0.003950169 |
| Basidiomycota | Leucoagaricus    | 0.5342 | 0      | 0.4658 | 8.79E-05 | 0        | 7.66E-05    |
| Ascomycota    | Pseudopithomyces | 0.5058 | 0.4661 | 0.0281 | 0.000591 | 0.000545 | 3.28E-05    |

|               |                    |        |        |        |          |          |             |
|---------------|--------------------|--------|--------|--------|----------|----------|-------------|
| Ascomycota    | Conlarium          | 0.1025 | 0      | 0.8975 | 0.000112 | 0        | 0.000979335 |
| Ascomycota    | Saccharomyces      | 0.2112 | 0.4091 | 0.3798 | 0.000128 | 0.000248 | 0.000229788 |
| Ascomycota    | Penicillium        | 0.4381 | 0.2608 | 0.3011 | 0.023449 | 0.01396  | 0.016112531 |
| Basidiomycota | Wallemia           | 0.6096 | 0      | 0.3904 | 0.001957 | 0        | 0.001252893 |
| Ascomycota    | Bipolaris          | 0.574  | 0      | 0.426  | 9.58E-05 | 0        | 7.11E-05    |
| Basidiomycota | Mrakia             | 0.8484 | 0      | 0.1516 | 0.000184 | 0        | 3.28E-05    |
| Ascomycota    | Neobulgaria        | 0.4901 | 0.268  | 0.2419 | 0.000543 | 0.000297 | 0.000268086 |
| Ascomycota    | Lophiostoma        | 0.0172 | 0.9718 | 0.011  | 0.000128 | 0.007227 | 8.21E-05    |
| Ascomycota    | Meyerozyma         | 0.4801 | 0      | 0.5199 | 0.000495 | 0        | 0.000536172 |
| Basidiomycota | Psathyrella        | 0.1883 | 0.8117 | 0      | 0.000367 | 0.001584 | 0           |
| Basidiomycota | Dioszegia          | 0.0165 | 0      | 0.9835 | 7.99E-06 | 0        | 0.00047599  |
| Ascomycota    | Metarhizium        | 0.809  | 0.0467 | 0.1443 | 0.014911 | 0.000861 | 0.002658978 |
| Ascomycota    | Neosascochyta      | 0      | 0      | 1      | 0        | 0        | 0.000186019 |
| Ascomycota    | Scopulariopsis     | 0.8126 | 0      | 0.1874 | 0.000807 | 0        | 0.000186019 |
| Ascomycota    | Hydropisphaera     | 0.4857 | 0      | 0.5143 | 0.000264 | 0        | 0.000279029 |
| Ascomycota    | Millerozyma        | 0.9942 | 0      | 0.0058 | 0.000934 | 0        | 5.47E-06    |
| Basidiomycota | Porothelium        | 0.8841 | 0.0068 | 0.1091 | 0.001286 | 9.90E-06 | 0.000158663 |
| Ascomycota    | Ilyonectria        | 0.4642 | 0.4073 | 0.1285 | 0.004784 | 0.004198 | 0.001324018 |
| Basidiomycota | Mycenella          | 1      | 0      | 0      | 0.000447 | 0        | 0           |
| Ascomycota    | Pseudeurotium      | 0.0577 | 0.5415 | 0.4008 | 5.59E-05 | 0.000525 | 0.000388452 |
| Ascomycota    | Phoma              | 0      | 0.9429 | 0.0571 | 0        | 0.000723 | 4.38E-05    |
| Ascomycota    | Microdochium       | 0.2594 | 0      | 0.7406 | 0.000383 | 0        | 0.00109423  |
| Basidiomycota | Golubevia          | 0.4367 | 0.5633 | 0      | 0.001382 | 0.001782 | 0           |
| Basidiomycota | Lycoperdon         | 0.0406 | 0      | 0.9594 | 1.60E-05 | 0        | 0.000377509 |
| Basidiomycota | Conocybe           | 0.7378 | 0.2622 | 0      | 0.005934 | 0.002109 | 0           |
| Ascomycota    | Podospaera         | 0.8751 | 0      | 0.1249 | 0.000192 | 0        | 2.74E-05    |
| Basidiomycota | Lindtneria         | 0.9914 | 0.0086 | 0      | 0.02856  | 0.000248 | 0           |
| Ascomycota    | Sphaerospora       | 0.7178 | 0      | 0.2822 | 0.002324 | 0        | 0.000913682 |
| Ascomycota    | Toxicocladosporium | 0      | 0.1927 | 0.8073 | 0        | 0.000832 | 0.003485121 |

|                 |                   |        |        |        |          |          |             |
|-----------------|-------------------|--------|--------|--------|----------|----------|-------------|
| Cercozoa        | Unclassified      | 0.1421 | 0.8432 | 0.0147 | 0.004289 | 0.025454 | 0.000443163 |
| Ascomycota      | Marssonina        | 1      | 0      | 0      | 0.000136 | 0        | 0           |
| Ascomycota      | Mycocentrospora   | 0.236  | 0.6023 | 0.1617 | 0.000272 | 0.000693 | 0.000186019 |
| Basidiomycota   | Unclassified      | 0.6619 | 0.2415 | 0.0966 | 0.05835  | 0.021286 | 0.008518577 |
| Ascomycota      | Cordyceps         | 0.8526 | 0.1051 | 0.0422 | 0.004417 | 0.000545 | 0.000218846 |
| Ascomycota      | Hirsutella        | 0.8221 | 0      | 0.1779 | 0.000152 | 0        | 3.28E-05    |
| Ascomycota      | Chaetosphaeria    | 0.5242 | 0      | 0.4758 | 0.000319 | 0        | 0.000289971 |
| Ascomycota      | Ophiocordyceps    | 0.4392 | 0      | 0.5608 | 0.000527 | 0        | 0.000672951 |
| Ascomycota      | Talaromyces       | 0.3179 | 0.0485 | 0.6336 | 0.002204 | 0.000337 | 0.004393332 |
| Ascomycota      | Pyrenochaeta      | 1      | 0      | 0      | 0.000232 | 0        | 0           |
| Ascomycota      | Ascobolus         | 0.6946 | 0.0179 | 0.2875 | 0.000383 | 9.90E-06 | 0.000158663 |
| Chytridiomycota | Rhizophlyctis     | 0.769  | 0      | 0.231  | 0.000455 | 0        | 0.000136779 |
| Glomeromycota   | Glomus            | 0.4771 | 0      | 0.5229 | 3.99E-05 | 0        | 4.38E-05    |
| Glomeromycota   | Unclassified      | 0.1371 | 0.3712 | 0.4918 | 0.000303 | 0.000822 | 0.001088758 |
| Ascomycota      | Phaeoisaria       | 0.3602 | 0.5555 | 0.0843 | 0.000327 | 0.000505 | 7.66E-05    |
| Ascomycota      | Chloridium        | 0.1304 | 0.8126 | 0.0571 | 0.000288 | 0.001792 | 0.000125836 |
| Ascomycota      | Geoglossum        | 0      | 0      | 1      | 0        | 0        | 0.00052523  |
| Ascomycota      | Helicoma          | 0      | 0      | 1      | 0        | 0        | 0.00014225  |
| Ascomycota      | Coniosporium      | 0.3051 | 0.2427 | 0.4523 | 0.000535 | 0.000426 | 0.000793316 |
| Ascomycota      | Phaeobotryon      | 1      | 0      | 0      | 0.00024  | 0        | 0           |
| Basidiomycota   | Tubaria           | 0.9079 | 0      | 0.0921 | 0.000216 | 0        | 2.19E-05    |
| Basidiomycota   | Thelephora        | 0.3883 | 0      | 0.6117 | 0.00016  | 0        | 0.000251673 |
| Ascomycota      | Pseudocoleophoma  | 0      | 1      | 0      | 0        | 0.002643 | 0           |
| Ascomycota      | Exserohilum       | 0.7231 | 0.0944 | 0.1825 | 0.000152 | 1.98E-05 | 3.83E-05    |
| Ascomycota      | Stachybotrys      | 0.2943 | 0      | 0.7057 | 4.79E-05 | 0        | 0.000114894 |
| Ascomycota      | Subramaniula      | 1      | 0      | 0      | 0.00024  | 0        | 0           |
| Basidiomycota   | Malassezia        | 0.2106 | 0.2647 | 0.5248 | 0.006869 | 0.008633 | 0.017119222 |
| Ascomycota      | Chaetosphaeronema | 0.7619 | 0      | 0.2381 | 0.000823 | 0        | 0.000257144 |
| Ascomycota      | Kernia            | 0.0632 | 0.9368 | 0      | 0.0002   | 0.00296  | 0           |

|                 |                    |        |        |        |          |          |             |
|-----------------|--------------------|--------|--------|--------|----------|----------|-------------|
| Ascomycota      | Harposporium       | 0      | 0      | 1      | 0        | 0        | 0.000202432 |
| Ascomycota      | Zasmidium          | 0      | 0.9904 | 0.0096 | 0        | 0.000564 | 5.47E-06    |
| Ascomycota      | Candida            | 0.1606 | 0.0852 | 0.7541 | 0.002164 | 0.001148 | 0.010159922 |
| Ascomycota      | Phyllosticta       | 0.5387 | 0      | 0.4613 | 0.001565 | 0        | 0.001340431 |
| Ascomycota      | Fusidium           | 0      | 0      | 1      | 0        | 0        | 0.000153192 |
| Glomeromycota   | Rhizophagus        | 0.0364 | 0.953  | 0.0106 | 0.000543 | 0.014217 | 0.000158663 |
| Basidiomycota   | Panaeolus          | 0      | 0.1561 | 0.8439 | 0        | 0.000139 | 0.000749547 |
| Ascomycota      | Minimelanolocus    | 1      | 0      | 0      | 0.011756 | 0        | 0           |
| Basidiomycota   | Coprinus           | 0.6455 | 0      | 0.3545 | 0.001006 | 0        | 0.000552586 |
| Ascomycota      | Hawksworthiomyces  | 0.0772 | 0      | 0.9228 | 7.19E-05 | 0        | 0.00085897  |
| Ascomycota      | Tolypocladium      | 1      | 0      | 0      | 0.000439 | 0        | 0           |
| Aphelidiomycota | Unclassified       | 0.5633 | 0      | 0.4367 | 0.000727 | 0        | 0.000563528 |
| Ascomycota      | Periconia          | 0.9293 | 0      | 0.0707 | 0.000216 | 0        | 1.64E-05    |
| Ascomycota      | Trichaleurina      | 0      | 0      | 1      | 0        | 0        | 0.000574471 |
| Ascomycota      | Latorua            | 0.6929 | 0      | 0.3071 | 0.000272 | 0        | 0.000120365 |
| Ascomycota      | Humicola           | 0.1612 | 0.5027 | 0.3361 | 0.001997 | 0.006227 | 0.004163544 |
| Ascomycota      | Mycoleptodiscus    | 1      | 0      | 0      | 0.000303 | 0        | 0           |
| Basidiomycota   | Pleurotus          | 1      | 0      | 0      | 0.000303 | 0        | 0           |
| Ascomycota      | Remersonia         | 1      | 0      | 0      | 0.000559 | 0        | 0           |
| Basidiomycota   | Cortinarius        | 0.9761 | 0      | 0.0239 | 0.000224 | 0        | 5.47E-06    |
| Basidiomycota   | Rhodosporidiobolus | 0      | 0      | 1      | 0        | 0        | 0.000186019 |
| Basidiomycota   | Coprinopsis        | 0.821  | 0      | 0.179  | 0.000527 | 0        | 0.000114894 |
| Ascomycota      | Unclassified       | 0.3011 | 0.2797 | 0.4192 | 0.183869 | 0.170762 | 0.255951241 |
| Basidiomycota   | Sporobolomyces     | 0.4162 | 0      | 0.5838 | 0.000168 | 0        | 0.000235259 |
| Basidiomycota   | Piloderma          | 0      | 0      | 1      | 0        | 0        | 0.00019149  |
| Ascomycota      | Trichoderma        | 0.4004 | 0.185  | 0.4147 | 0.005679 | 0.002624 | 0.005881484 |
| Ascomycota      | Cadophora          | 0.2449 | 0      | 0.7551 | 3.19E-05 | 0        | 9.85E-05    |
| Ascomycota      | Thielavia          | 0.3681 | 0.0848 | 0.5471 | 0.002492 | 0.000574 | 0.003703967 |
| Basidiomycota   | Mycena             | 0      | 0      | 1      | 0        | 0        | 0.000136779 |

|               |                     |        |        |        |          |          |             |
|---------------|---------------------|--------|--------|--------|----------|----------|-------------|
| Olpidiomycota | Olpidium            | 0.996  | 0      | 0.004  | 0.002731 | 0        | 1.09E-05    |
| Ascomycota    | Acrostalagmus       | 0.6533 | 0      | 0.3467 | 0.000567 | 0        | 0.000300913 |
| Ascomycota    | Pichia              | 0.7214 | 0      | 0.2786 | 0.000439 | 0        | 0.000169606 |
| Unclassified  | Unclassified        | 0.3367 | 0.4718 | 0.1915 | 0.133672 | 0.187326 | 0.076043485 |
| Basidiomycota | Fomitopsis          | 0.1126 | 0      | 0.8874 | 7.99E-05 | 0        | 0.000629182 |
| Rozellomycota | Unclassified        | 0.9254 | 0      | 0.0746 | 0.001765 | 0        | 0.00014225  |
| Ascomycota    | Beauveria           | 0.78   | 0      | 0.22   | 0.000272 | 0        | 7.66E-05    |
| Ascomycota    | Stagonosporopsis    | 0.1466 | 0      | 0.8534 | 0.00016  | 0        | 0.000930095 |
| Basidiomycota | Cutaneotrichosporon | 0.1141 | 0.0532 | 0.8327 | 0.000807 | 0.000376 | 0.005886955 |
| Basidiomycota | Lepiota             | 0.8902 | 0      | 0.1098 | 0.000399 | 0        | 4.92E-05    |
| Basidiomycota | Trichosporon        | 0.455  | 0.0038 | 0.5412 | 0.001182 | 9.90E-06 | 0.001406085 |
| Mucoromycota  | Rhizomucor          | 0      | 0      | 1      | 0        | 0        | 0.001028576 |
| Basidiomycota | Phallus             | 0      | 1      | 0      | 0        | 0.005831 | 0           |
| Ascomycota    | Acaulium            | 0      | 0      | 1      | 0        | 0        | 0.000366567 |
| Ascomycota    | Simplicillium       | 0.9119 | 0      | 0.0881 | 0.009456 | 0        | 0.000913682 |
| Ascomycota    | Gliomastix          | 0.7115 | 0      | 0.2885 | 0.000391 | 0        | 0.000158663 |
| Mucoromycota  | Umbelopsis          | 0      | 0      | 1      | 0        | 0        | 0.000202432 |
| Basidiomycota | Peniophorella       | 1      | 0      | 0      | 0.000399 | 0        | 0           |
| Basidiomycota | Symmetrospora       | 0      | 1      | 0      | 0        | 0.000317 | 0           |
| Ascomycota    | Myceliophthora      | 0.3746 | 0      | 0.6254 | 0.00115  | 0        | 0.001920373 |
| Ascomycota    | Archaeorhizomyces   | 0.6199 | 0.0556 | 0.3245 | 0.00254  | 0.000228 | 0.001329489 |
| Ascomycota    | Curvularia          | 0.0787 | 0.6602 | 0.2612 | 0.000104 | 0.000871 | 0.000344682 |
| Ascomycota    | Pseudocercospora    | 0.0121 | 0      | 0.9879 | 0.000272 | 0        | 0.022218332 |
| Ascomycota    | Uwebraunia          | 1      | 0      | 0      | 0.000192 | 0        | 0           |
| Ascomycota    | Knufia              | 0.7995 | 0.1339 | 0.0666 | 0.003546 | 0.000594 | 0.000295442 |
| Ascomycota    | Fusicolla           | 0.5185 | 0      | 0.4815 | 0.000359 | 0        | 0.00033374  |
| Basidiomycota | Gymnopus            | 0      | 1      | 0      | 0        | 0.000297 | 0           |
| Basidiomycota | Hygrocybe           | 0.2622 | 0.0329 | 0.7049 | 0.002763 | 0.000347 | 0.007429819 |
| Ascomycota    | Leptosphaeria       | 0.3903 | 0      | 0.6097 | 0.0002   | 0        | 0.000311855 |

|                 |                   |        |        |        |          |          |             |
|-----------------|-------------------|--------|--------|--------|----------|----------|-------------|
| Basidiomycota   | Apiotrichum       | 0.1332 | 0      | 0.8668 | 3.19E-05 | 0        | 0.000207904 |
| Ascomycota      | Leohumicola       | 0.8751 | 0      | 0.1249 | 0.000192 | 0        | 2.74E-05    |
| Basidiomycota   | Papiliotrema      | 0.2389 | 0.3645 | 0.3966 | 0.000208 | 0.000317 | 0.000344682 |
| Ascomycota      | Cephalotrichum    | 0.3    | 0      | 0.7    | 0.000296 | 0        | 0.000689365 |
| Basidiomycota   | Sterigmatomyces   | 0.4678 | 0      | 0.5322 | 0.000895 | 0        | 0.001017634 |
| Basidiomycota   | Subulicystidium   | 0.8145 | 0.0852 | 0.1003 | 0.007196 | 0.000752 | 0.000886326 |
| Ascomycota      | Acephala          | 0.2176 | 0      | 0.7824 | 0.000192 | 0        | 0.000689365 |
| Chytridiomycota | Rhizophydium      | 0.7415 | 0.2585 | 0      | 0.000256 | 8.91E-05 | 0           |
| Ascomycota      | Fusarium          | 0.0752 | 0.0302 | 0.8946 | 0.0069   | 0.002772 | 0.08207269  |
| Ascomycota      | Monascus          | 0      | 0      | 1      | 0        | 0        | 0.000683893 |
| Ascomycota      | Preussia          | 0.8762 | 0      | 0.1238 | 0.003522 | 0        | 0.000497874 |
| Chytridiomycota | Powellomyces      | 0.9601 | 0      | 0.0399 | 0.000264 | 0        | 1.09E-05    |
| Ascomycota      | Lasiodiplodia     | 0.0524 | 0.0222 | 0.9254 | 0.000887 | 0.000376 | 0.015658425 |
| Ascomycota      | Nigrospora        | 0.8639 | 0.0118 | 0.1242 | 0.001446 | 1.98E-05 | 0.000207904 |
| Mucoromycota    | Rhizopus          | 0      | 0      | 1      | 0        | 0        | 0.00014225  |
| Ascomycota      | Schwanniomyces    | 1      | 0      | 0      | 0.000216 | 0        | 0           |
| Ascomycota      | Geomyces          | 0.521  | 0.0038 | 0.4752 | 0.00135  | 9.90E-06 | 0.001231008 |
| Ascomycota      | Scytalidium       | 0      | 0      | 1      | 0        | 0        | 0.00052523  |
| Ascomycota      | Pseudallescheria  | 0.6964 | 0      | 0.3036 | 0.000264 | 0        | 0.000114894 |
| Ascomycota      | Sphaerulina       | 0      | 0      | 1      | 0        | 0        | 0.00323892  |
| Ascomycota      | Dimorphospora     | 1      | 0      | 0      | 0.000288 | 0        | 0           |
| Ascomycota      | Peziza            | 0      | 1      | 0      | 0        | 0.00099  | 0           |
| Ascomycota      | Neocamarosporium  | 0      | 0      | 1      | 0        | 0        | 0.000207904 |
| Ascomycota      | Nadsonia          | 0.0293 | 0      | 0.9707 | 3.99E-05 | 0        | 0.001324018 |
| Ascomycota      | Schizothecium     | 0.306  | 0.3319 | 0.3621 | 0.000703 | 0.000762 | 0.000831614 |
| Ascomycota      | Pithoascus        | 0      | 0      | 1      | 0        | 0        | 0.000842557 |
| Ascomycota      | Tetracladium      | 0.194  | 0.6293 | 0.1766 | 0.001166 | 0.003782 | 0.001061403 |
| Ascomycota      | Dendrosporium     | 0.0259 | 0.7875 | 0.1865 | 1.60E-05 | 0.000485 | 0.000114894 |
| Basidiomycota   | Camarophylloopsis | 0.8975 | 0      | 0.1025 | 0.000288 | 0        | 3.28E-05    |



|               |                   |        |        |        |          |          |             |
|---------------|-------------------|--------|--------|--------|----------|----------|-------------|
| Basidiomycota | Hannaella         | 0.0366 | 0.217  | 0.7464 | 0.000112 | 0.000663 | 0.002281469 |
| Ascomycota    | Dichotomopilus    | 0.9643 | 0      | 0.0357 | 0.000887 | 0        | 3.28E-05    |
| Ascomycota    | Microascus        | 0.2818 | 0.0087 | 0.7095 | 0.000319 | 9.90E-06 | 0.000804259 |
| Ascomycota    | Gamsia            | 1      | 0      | 0      | 0.0002   | 0        | 0           |
| Ascomycota    | Poaceascoma       | 1      | 0      | 0      | 0.001118 | 0        | 0           |
| Ascomycota    | Gaeumannomyces    | 0      | 0.1016 | 0.8984 | 0        | 2.97E-05 | 0.000262615 |
| Basidiomycota | Tulostoma         | 0      | 0      | 1      | 0        | 0        | 0.000497874 |
| Ascomycota    | Plectosphaerella  | 0.4722 | 0.1603 | 0.3675 | 0.011493 | 0.003901 | 0.008945327 |
| Ascomycota    | Teichospora       | 0      | 0      | 1      | 0        | 0        | 0.000454105 |
| Ascomycota    | Zygosaccharomyces | 0.9188 | 0      | 0.0812 | 0.000248 | 0        | 2.19E-05    |
| Ascomycota    | Wardomyces        | 1      | 0      | 0      | 0.000583 | 0        | 0           |
| Ascomycota    | Darksidea         | 0.4183 | 0.1402 | 0.4415 | 0.000296 | 9.90E-05 | 0.000311855 |
| Ascomycota    | Aureobasidium     | 0.1878 | 0.3864 | 0.4257 | 0.001501 | 0.003089 | 0.003403054 |
| Ascomycota    | Apodus            | 0.8278 | 0      | 0.1722 | 0.000447 | 0        | 9.30E-05    |
